# Supplementary material for: Metagenomic analysis with strain-level resolution reveals fine-scale variation in the human pregnancy microbiome
Source: HighWire-hosted journal article supplement (doi:10.1101/gr.236000.118), 2018-09-19
Supplement: Supplemental_Table_S1.xlsx [file Supplemental_Table_S1.xlsx]

## Sheet: Sheet1
Supplemental Table S1. Demographics of female subjects who donated samples for this work. Estimated gestational age in days at the time of sample collection
is presented under the gestational week. * = Did not provide a stool or rectal swab sample. Red boxes indicate gestational week at delivery
Subject	Patient	Age	Race/Ethnicity	BMI	Pregnancy	Previous Pregnancy History			Estimated Gestational Age (number in days, shown by week)
	ID	at consent			Complication	Term (Live)	Preterm (Live)	Loss	1	2	3	4	5	6	7	8	9	10	11	12	13	14	15	16	17	18	19	20	21	22	23	24	25	26	27	28	29	30	31	32	33	34	35	36	37	38	39	40	40
term1	10039	33	White	20.2														66			89			108			130			151			171			192			213		227				255			276
term2	10044	20	White	26.2	oligohydramnios	1		3										66			85		105			126				148		168				190			211		231				254		269
term3	10034	36	Asian	18.2			1											64			85			106			127			148		168			189			210			231				255	266
term4	10032	34	White	21.1	mild preeclampsia	1		1												82			103				131			152		166			187			207			230			250			271
term5	10047	27	White	27.9	mild preeclampsia; breech	1														84			105				133		147				175			191		210			231			252			273
term6	10046	38	White/Hispanic	36.8	Type 2 Diabetes, obesity	2		1							44			64			85			106*				134		148						190			211			232		253				274
pre1	10101	34	White	22			1	3	7	13					43			65			85		104				129			146			169		189			210			231			254
pre2	10031	23	White	23.7	preeclampsia												57	64		83			104			125				153		167			188		202
pre3	10036	29	White	21.8															71*	78*				106*			128*			151*			170*			190*			211*			232*		246*
pre4	10029	32	Pacific Islander	32.2			1	2												78	85			106			127			148
