# Supplementary material for: Metagenomic analysis with strain-level resolution reveals fine-scale variation in the human pregnancy microbiome
Source: HighWire-hosted journal article supplement (doi:10.1101/gr.236000.118), 2018-09-19
Supplement: Supplemental_Table_S2.xlsx [file Supplemental_Table_S2.xlsx]

## Sheet: Table_S3
Supplementary Table S3. Extracted spacer sequences and their associated repeat sequences. This table contains all the repeat and spacers used in this study.
Spacers and repeats that were extracted by site are labeled with “Vaginal”, “Gut”, and “Saliva”. Spacers and repeats that were extracted per site and per individual have
the subject ID (“Term1”, “Term2”, etc) and site information (“Vaginal”, “Gut”, “Saliva”).
Spacer ID	Spacer sequence	Repeat ID	Repeat sequence
Gut_R1_SP1	ACGGTGATGTTTTGCTTGATAACGGGCGGT	Gut_R1	GTTTGAGAATAGTGTAAATCTATAAGGTAGTAAAAC
Gut_R1_SP10	GGTCACGATAAAAGTTAATGTTTTCCCTCA	Gut_R1	GTTTGAGAATAGTGTAAATCTATAAGGTAGTAAAAC
Gut_R1_SP100	AAGCTCTGCTTGATAATAAAACTGACCTGT	Gut_R1	GTTTGAGAATAGTGTAAATCTATAAGGTAGTAAAAC
Gut_R1_SP101	TGAATGAAGAATTATTATTCGGATCAATTT	Gut_R1	GTTTGAGAATAGTGTAAATCTATAAGGTAGTAAAAC
Gut_R1_SP102	TATAAATCGGATGTGTGCCGTCACGGAGC	Gut_R1	GTTTGAGAATAGTGTAAATCTATAAGGTAGTAAAAC
Gut_R1_SP103	CGGATATCTTTCACCGAAAGAAATTGAAG	Gut_R1	GTTTGAGAATAGTGTAAATCTATAAGGTAGTAAAAC
Gut_R1_SP104	AAACGAGGTAAGGTTACTTCCAGAATCGGA	Gut_R1	GTTTGAGAATAGTGTAAATCTATAAGGTAGTAAAAC
Gut_R1_SP105	CAAGCGTTGAATTTCTTATTCTCTTTTCTTT	Gut_R1	GTTTGAGAATAGTGTAAATCTATAAGGTAGTAAAAC
Gut_R1_SP106	TAACCCAACCGCATATACTTTTTGACGGCTA	Gut_R1	GTTTGAGAATAGTGTAAATCTATAAGGTAGTAAAAC
Gut_R1_SP107	CTAATTCTACGGCAGAAGATATCGTTTTGT	Gut_R1	GTTTGAGAATAGTGTAAATCTATAAGGTAGTAAAAC
Gut_R1_SP108	CAGCGCACTGCAACATCATCAGCTCGCACA	Gut_R1	GTTTGAGAATAGTGTAAATCTATAAGGTAGTAAAAC
Gut_R1_SP109	CATTCCGCCGGCGTTTGTGATTGCCCAGTA	Gut_R1	GTTTGAGAATAGTGTAAATCTATAAGGTAGTAAAAC
Gut_R1_SP11	TTTAAAAACATACACACCGCACGCCACTAT	Gut_R1	GTTTGAGAATAGTGTAAATCTATAAGGTAGTAAAAC
Gut_R1_SP110	TTTGGTGTTTTCAAGGTCTTCCGAGCACTG	Gut_R1	GTTTGAGAATAGTGTAAATCTATAAGGTAGTAAAAC
Gut_R1_SP111	TTTAACAATGTTTATAGCCGCCTTAACGAG	Gut_R1	GTTTGAGAATAGTGTAAATCTATAAGGTAGTAAAAC
Gut_R1_SP112	GAGGAATTCGACTTATACCATAAACATAGT	Gut_R1	GTTTGAGAATAGTGTAAATCTATAAGGTAGTAAAAC
Gut_R1_SP113	TATTACAAAGTCCCATAGAACGGACTTTGCA	Gut_R1	GTTTGAGAATAGTGTAAATCTATAAGGTAGTAAAAC
Gut_R1_SP114	TGCCATAGTAGTATCTTGAATAAGCATTCT	Gut_R1	GTTTGAGAATAGTGTAAATCTATAAGGTAGTAAAAC
Gut_R1_SP115	TAGTATGGTGTATAGTGTAGTATGATATAG	Gut_R1	GTTTGAGAATAGTGTAAATCTATAAGGTAGTAAAAC
Gut_R1_SP116	TTATTTCATAAACTTGCGGAATTGCTTGC	Gut_R1	GTTTGAGAATAGTGTAAATCTATAAGGTAGTAAAAC
Gut_R1_SP117	CGATGCCAAAGCAAAACTTGCCGTGCTTGC	Gut_R1	GTTTGAGAATAGTGTAAATCTATAAGGTAGTAAAAC
Gut_R1_SP118	CGTTGAACCCTCACGGTACGGAGCAGACGG	Gut_R1	GTTTGAGAATAGTGTAAATCTATAAGGTAGTAAAAC
Gut_R1_SP119	CTAATATGTTATACTATATTTAACAAAAGA	Gut_R1	GTTTGAGAATAGTGTAAATCTATAAGGTAGTAAAAC
Gut_R1_SP12	TTGCACATAAAAAAAAAACACCTACTACAA	Gut_R1	GTTTGAGAATAGTGTAAATCTATAAGGTAGTAAAAC
Gut_R1_SP120	TGAATGCTTAAAGGCTCAAAGCGTGATAGT	Gut_R1	GTTTGAGAATAGTGTAAATCTATAAGGTAGTAAAAC
Gut_R1_SP121	TAAATTCGTTGTAAATGGCGACCACCTCG	Gut_R1	GTTTGAGAATAGTGTAAATCTATAAGGTAGTAAAAC
Gut_R1_SP122	AATGGGCAAAAGCAACCGCTGTCAGAGCA	Gut_R1	GTTTGAGAATAGTGTAAATCTATAAGGTAGTAAAAC
Gut_R1_SP123	CGATATTGCTTTGCATTTCATAACCGAGGT	Gut_R1	GTTTGAGAATAGTGTAAATCTATAAGGTAGTAAAAC
Gut_R1_SP124	ATTAATAGTTTTCAAAAATAAATATGATTT	Gut_R1	GTTTGAGAATAGTGTAAATCTATAAGGTAGTAAAAC
Gut_R1_SP125	TATTCGGCTAAAATTGATAGTCGTTGACA	Gut_R1	GTTTGAGAATAGTGTAAATCTATAAGGTAGTAAAAC
Gut_R1_SP126	CTATGACGCCGTTAAAAAGCTTGCGTAAAAC	Gut_R1	GTTTGAGAATAGTGTAAATCTATAAGGTAGTAAAAC
Gut_R1_SP127	ATTTCATCGGTTGCAGAGTGTTCACGTTC	Gut_R1	GTTTGAGAATAGTGTAAATCTATAAGGTAGTAAAAC
Gut_R1_SP128	CTGCATAATTGCACATATTCCGCACCGGG	Gut_R1	GTTTGAGAATAGTGTAAATCTATAAGGTAGTAAAAC
Gut_R1_SP129	CCAAACGGCTCTATCACATTTGTGTATCGAC	Gut_R1	GTTTGAGAATAGTGTAAATCTATAAGGTAGTAAAAC
Gut_R1_SP13	ACAGTCAGCGAATGTTGCCATTGCCCAAAA	Gut_R1	GTTTGAGAATAGTGTAAATCTATAAGGTAGTAAAAC
Gut_R1_SP130	ACAGGCTGTAAAGTGCCGACAATCGTGTTA	Gut_R1	GTTTGAGAATAGTGTAAATCTATAAGGTAGTAAAAC
Gut_R1_SP131	TTTGCTCTCTCAGATGAGGCAGAGAGGTA	Gut_R1	GTTTGAGAATAGTGTAAATCTATAAGGTAGTAAAAC
Gut_R1_SP132	TTGTCGTAATAAATGTAAATGCCCCTATTT	Gut_R1	GTTTGAGAATAGTGTAAATCTATAAGGTAGTAAAAC
Gut_R1_SP133	TCTGCTCTGCGACATTAGGTTCTTCAAGTT	Gut_R1	GTTTGAGAATAGTGTAAATCTATAAGGTAGTAAAAC
Gut_R1_SP134	GATTTTCGCTGTTGTTGCTGTAACAGATGG	Gut_R1	GTTTGAGAATAGTGTAAATCTATAAGGTAGTAAAAC
Gut_R1_SP135	TCTCTGCCGTTGGACTACTGTGTCATATCC	Gut_R1	GTTTGAGAATAGTGTAAATCTATAAGGTAGTAAAAC
Gut_R1_SP136	AACGGGCAAGTTACAGACATTGCAAAACAA	Gut_R1	GTTTGAGAATAGTGTAAATCTATAAGGTAGTAAAAC
Gut_R1_SP137	TGTTGGGCAGTTTGTGATGTATGAACCGTC	Gut_R1	GTTTGAGAATAGTGTAAATCTATAAGGTAGTAAAAC
Gut_R1_SP138	TTTTTCCATCTTCTGAGGTAACTGATGTTA	Gut_R1	GTTTGAGAATAGTGTAAATCTATAAGGTAGTAAAAC
Gut_R1_SP139	TCTACGCAACTTCTTTATAAACTGCTTAT	Gut_R1	GTTTGAGAATAGTGTAAATCTATAAGGTAGTAAAAC
Gut_R1_SP14	TGTTAAAGTTTCGCCCTCAAGATATAGCTT	Gut_R1	GTTTGAGAATAGTGTAAATCTATAAGGTAGTAAAAC
Gut_R1_SP140	GAAAAATATCTTGAATACAAATCAAAGTGC	Gut_R1	GTTTGAGAATAGTGTAAATCTATAAGGTAGTAAAAC
Gut_R1_SP141	TTTTGAAACGAAAACATCCGTTGTCAAAAT	Gut_R1	GTTTGAGAATAGTGTAAATCTATAAGGTAGTAAAAC
Gut_R1_SP142	TCATAAAAGTCACTCATATATGCAAAAGC	Gut_R1	GTTTGAGAATAGTGTAAATCTATAAGGTAGTAAAAC
Gut_R1_SP143	TGACTGCCGTGTTGCCTACTCTCACACCGA	Gut_R1	GTTTGAGAATAGTGTAAATCTATAAGGTAGTAAAAC
Gut_R1_SP144	CTGAATTTCTGCGAGTATTTCAGCCGATAG	Gut_R1	GTTTGAGAATAGTGTAAATCTATAAGGTAGTAAAAC
Gut_R1_SP145	TATTGTCTGTGCAGATAATGATGAAGCAG	Gut_R1	GTTTGAGAATAGTGTAAATCTATAAGGTAGTAAAAC
Gut_R1_SP146	CACAGGGGGTGAGATAATGAACATCACAAGA	Gut_R1	GTTTGAGAATAGTGTAAATCTATAAGGTAGTAAAAC
Gut_R1_SP147	TAGTTCTTTTTTTAAGCGGAAAAGACTCA	Gut_R1	GTTTGAGAATAGTGTAAATCTATAAGGTAGTAAAAC
Gut_R1_SP148	ATTATCTTAATATATCACTCTCGGATGATGA	Gut_R1	GTTTGAGAATAGTGTAAATCTATAAGGTAGTAAAAC
Gut_R1_SP149	TATTGTATGTGCAGATAATGATGAAGCGG	Gut_R1	GTTTGAGAATAGTGTAAATCTATAAGGTAGTAAAAC
Gut_R1_SP15	CGGGTGTGTTGTCTTTATCCTCTCGCCAGC	Gut_R1	GTTTGAGAATAGTGTAAATCTATAAGGTAGTAAAAC
Gut_R1_SP150	CGACCGTGTTCTCGTTAAGAACCTTAATAA	Gut_R1	GTTTGAGAATAGTGTAAATCTATAAGGTAGTAAAAC
Gut_R1_SP151	TTTCACAATCCACCTATTCCGCCTCCTTA	Gut_R1	GTTTGAGAATAGTGTAAATCTATAAGGTAGTAAAAC
Gut_R1_SP152	CCCACTGTTTTGTAGGGTCATACTCTATCG	Gut_R1	GTTTGAGAATAGTGTAAATCTATAAGGTAGTAAAAC
Gut_R1_SP153	AGCATTTCGTCACCTCCTTACAGCTCTAAT	Gut_R1	GTTTGAGAATAGTGTAAATCTATAAGGTAGTAAAAC
Gut_R1_SP154	TGTTCCTACTTTTCTTGCGACAGTGAAGCT	Gut_R1	GTTTGAGAATAGTGTAAATCTATAAGGTAGTAAAAC
Gut_R1_SP155	TGTCTTAAAGACAGAAAGGAAAATTATTAT	Gut_R1	GTTTGAGAATAGTGTAAATCTATAAGGTAGTAAAAC
Gut_R1_SP156	AAAACTAATAAAAGAGCTACATCACAGGAA	Gut_R1	GTTTGAGAATAGTGTAAATCTATAAGGTAGTAAAAC
Gut_R1_SP157	CAAATGTTGATGAGGAATACAGTGAATATT	Gut_R1	GTTTGAGAATAGTGTAAATCTATAAGGTAGTAAAAC
Gut_R1_SP158	ATATAATTCACTCGTTGCCACCTAAATGCA	Gut_R1	GTTTGAGAATAGTGTAAATCTATAAGGTAGTAAAAC
Gut_R1_SP159	TCTAAGACCCCGAGCCGTGCCGCCATTGCG	Gut_R1	GTTTGAGAATAGTGTAAATCTATAAGGTAGTAAAAC
Gut_R1_SP16	GATTACAAGCTGCCACATATCAAGTTTGAG	Gut_R1	GTTTGAGAATAGTGTAAATCTATAAGGTAGTAAAAC
Gut_R1_SP160	TTAACGATGACGGAACGCCTAAATGGGTA	Gut_R1	GTTTGAGAATAGTGTAAATCTATAAGGTAGTAAAAC
Gut_R1_SP161	CGATAGCTGTGTGCTTGTTCTGTACAAAAG	Gut_R1	GTTTGAGAATAGTGTAAATCTATAAGGTAGTAAAAC
Gut_R1_SP162	AATTTACATCGCCGTTGAAAAAACGGTGCA	Gut_R1	GTTTGAGAATAGTGTAAATCTATAAGGTAGTAAAAC
Gut_R1_SP17	ATATCCGTTTTCACCTATAGATATTATATA	Gut_R1	GTTTGAGAATAGTGTAAATCTATAAGGTAGTAAAAC
Gut_R1_SP18	AGTTCTTAAATTTTCCCATTCTCTCACCT	Gut_R1	GTTTGAGAATAGTGTAAATCTATAAGGTAGTAAAAC
Gut_R1_SP19	TTTGAAAAATTTCAAAATAACCACCCTAA	Gut_R1	GTTTGAGAATAGTGTAAATCTATAAGGTAGTAAAAC
Gut_R1_SP2	TTGTGCCTCTCCCGCAAATCTATAAGTCAC	Gut_R1	GTTTGAGAATAGTGTAAATCTATAAGGTAGTAAAAC
Gut_R1_SP20	CGTATTTATTTTTGTAACTAAAATATCCTTT	Gut_R1	GTTTGAGAATAGTGTAAATCTATAAGGTAGTAAAAC
Gut_R1_SP21	CTTGTGATTTTGAAACATCAGTTTATAAAG	Gut_R1	GTTTGAGAATAGTGTAAATCTATAAGGTAGTAAAAC
Gut_R1_SP22	AGATTTAACCTTGTTAGGGTCATCCATACC	Gut_R1	GTTTGAGAATAGTGTAAATCTATAAGGTAGTAAAAC
Gut_R1_SP23	AGAGCCGTGGATTACTCTTTTTGATAGTGT	Gut_R1	GTTTGAGAATAGTGTAAATCTATAAGGTAGTAAAAC
Gut_R1_SP24	TACAAGGTTTTAGGTTGGCAGAATCTGACA	Gut_R1	GTTTGAGAATAGTGTAAATCTATAAGGTAGTAAAAC
Gut_R1_SP25	CCTTATTAGCACAACATTACACGACGGGA	Gut_R1	GTTTGAGAATAGTGTAAATCTATAAGGTAGTAAAAC
Gut_R1_SP26	GTTGACCGTCATTTGATAGATAGAACCGTT	Gut_R1	GTTTGAGAATAGTGTAAATCTATAAGGTAGTAAAAC
Gut_R1_SP27	ATCACACTATACGGCACATGGTACAAGGCT	Gut_R1	GTTTGAGAATAGTGTAAATCTATAAGGTAGTAAAAC
Gut_R1_SP28	GGCTCTTCAAGTCCCGTGTGTAATAGGTC	Gut_R1	GTTTGAGAATAGTGTAAATCTATAAGGTAGTAAAAC
Gut_R1_SP29	CCATCTTGACAACACATCCTCGTCATTGCC	Gut_R1	GTTTGAGAATAGTGTAAATCTATAAGGTAGTAAAAC
Gut_R1_SP3	GGTATAGTATATACATGGGTTATCCCATAA	Gut_R1	GTTTGAGAATAGTGTAAATCTATAAGGTAGTAAAAC
Gut_R1_SP30	AGATACGGCACTTTTGAGCAATATACAGCA	Gut_R1	GTTTGAGAATAGTGTAAATCTATAAGGTAGTAAAAC
Gut_R1_SP31	AATATGATTTAAAGCTACTTGGCTTACTGA	Gut_R1	GTTTGAGAATAGTGTAAATCTATAAGGTAGTAAAAC
Gut_R1_SP32	TCTGTAATTTTAACAGTACAAAGTATAATA	Gut_R1	GTTTGAGAATAGTGTAAATCTATAAGGTAGTAAAAC
Gut_R1_SP33	TGTTCCCTCTCAATGAAACACTCCCCCACGG	Gut_R1	GTTTGAGAATAGTGTAAATCTATAAGGTAGTAAAAC
Gut_R1_SP34	TAACTTCTGTATTACCAACACTTACGCCCA	Gut_R1	GTTTGAGAATAGTGTAAATCTATAAGGTAGTAAAAC
Gut_R1_SP35	TGACAATCACTTGAAAATGTGATACAATA	Gut_R1	GTTTGAGAATAGTGTAAATCTATAAGGTAGTAAAAC
Gut_R1_SP36	ACACAAAATATGTAACACCTTGTACCAATC	Gut_R1	GTTTGAGAATAGTGTAAATCTATAAGGTAGTAAAAC
Gut_R1_SP37	CGATAATGTAAATAACGCCAATCGTTTTC	Gut_R1	GTTTGAGAATAGTGTAAATCTATAAGGTAGTAAAAC
Gut_R1_SP38	ATATGCCTTTCCGTCAACATTCACTATATA	Gut_R1	GTTTGAGAATAGTGTAAATCTATAAGGTAGTAAAAC
Gut_R1_SP39	CCTTATCCTCGGGAATCTGAACATTGAAC	Gut_R1	GTTTGAGAATAGTGTAAATCTATAAGGTAGTAAAAC
Gut_R1_SP4	AACGACATGCGACCCGAACACTTAGGAAGA	Gut_R1	GTTTGAGAATAGTGTAAATCTATAAGGTAGTAAAAC
Gut_R1_SP40	AATCAACTGTTTCTTGAATGCAAGTGTTGC	Gut_R1	GTTTGAGAATAGTGTAAATCTATAAGGTAGTAAAAC
Gut_R1_SP41	CAGCGAAATTTGTGCAGGCAACGGCTCTA	Gut_R1	GTTTGAGAATAGTGTAAATCTATAAGGTAGTAAAAC
Gut_R1_SP42	TTATACAAAATAATGTATAATTTTCACTT	Gut_R1	GTTTGAGAATAGTGTAAATCTATAAGGTAGTAAAAC
Gut_R1_SP43	AAACGAACGATAAATACATTTGTGAGCGCA	Gut_R1	GTTTGAGAATAGTGTAAATCTATAAGGTAGTAAAAC
Gut_R1_SP44	TGGTGACGGTACGGAAGAAATCCGCAAAGT	Gut_R1	GTTTGAGAATAGTGTAAATCTATAAGGTAGTAAAAC
Gut_R1_SP45	TGGTGGCGGTACGGAAGAAATCCGCAAAGT	Gut_R1	GTTTGAGAATAGTGTAAATCTATAAGGTAGTAAAAC
Gut_R1_SP46	AACAACATGCGACCCGAACACTTATGAAGA	Gut_R1	GTTTGAGAATAGTGTAAATCTATAAGGTAGTAAAAC
Gut_R1_SP47	ATTTTCGAGTAATATCAGCCCATGATGTTC	Gut_R1	GTTTGAGAATAGTGTAAATCTATAAGGTAGTAAAAC
Gut_R1_SP48	TACATTTGACCGTTAAATATTGACAATAAA	Gut_R1	GTTTGAGAATAGTGTAAATCTATAAGGTAGTAAAAC
Gut_R1_SP49	TACATTTGACCGTTAAAGATTGACAATGAA	Gut_R1	GTTTGAGAATAGTGTAAATCTATAAGGTAGTAAAAC
Gut_R1_SP5	TGGGAGTCAGGTGTCACAGATATACAGGAT	Gut_R1	GTTTGAGAATAGTGTAAATCTATAAGGTAGTAAAAC
Gut_R1_SP50	AGATGTTTCACCCTCAAGTTTTGCAGTTAC	Gut_R1	GTTTGAGAATAGTGTAAATCTATAAGGTAGTAAAAC
Gut_R1_SP51	AAAGGGGCTGTAATTGTGGATTATGAAACA	Gut_R1	GTTTGAGAATAGTGTAAATCTATAAGGTAGTAAAAC
Gut_R1_SP52	TCCCTCGTTATTTTCTTGAAAATACAGGTG	Gut_R1	GTTTGAGAATAGTGTAAATCTATAAGGTAGTAAAAC
Gut_R1_SP53	TACATCTGACCGTTAAATATTAACAATAAA	Gut_R1	GTTTGAGAATAGTGTAAATCTATAAGGTAGTAAAAC
Gut_R1_SP54	TTCGCATCTTGTCACTGAAATAGTTCTGCT	Gut_R1	GTTTGAGAATAGTGTAAATCTATAAGGTAGTAAAAC
Gut_R1_SP55	CGAAAAACTCCCTGAAAATGAACAGGATTA	Gut_R1	GTTTGAGAATAGTGTAAATCTATAAGGTAGTAAAAC
Gut_R1_SP56	GGTTAGAACGCTTGTACACCGTACAATTC	Gut_R1	GTTTGAGAATAGTGTAAATCTATAAGGTAGTAAAAC
Gut_R1_SP57	TACGAAATGCAGGGCAATATTTCACAGCTT	Gut_R1	GTTTGAGAATAGTGTAAATCTATAAGGTAGTAAAAC
Gut_R1_SP58	AGTCAGCAGCGACTTTGTCAACCTACTTG	Gut_R1	GTTTGAGAATAGTGTAAATCTATAAGGTAGTAAAAC
Gut_R1_SP59	TGCAACAAAATCAATCAGCGGTTACGATTG	Gut_R1	GTTTGAGAATAGTGTAAATCTATAAGGTAGTAAAAC
Gut_R1_SP6	TGGGAGTCAGGTGTCACAGATATACAGTAT	Gut_R1	GTTTGAGAATAGTGTAAATCTATAAGGTAGTAAAAC
Gut_R1_SP60	CGGCGGAGCAAATACAGATGTAAGTGCTAT	Gut_R1	GTTTGAGAATAGTGTAAATCTATAAGGTAGTAAAAC
Gut_R1_SP61	CGTTTCTGTTATTGTGTCGCCTCCTCCGAT	Gut_R1	GTTTGAGAATAGTGTAAATCTATAAGGTAGTAAAAC
Gut_R1_SP62	CGTTTCTTTTAAAATTGCGAAAACATCACA	Gut_R1	GTTTGAGAATAGTGTAAATCTATAAGGTAGTAAAAC
Gut_R1_SP63	TATAACGGCGCCGGCGCAAGTGCAACAGGC	Gut_R1	GTTTGAGAATAGTGTAAATCTATAAGGTAGTAAAAC
Gut_R1_SP64	ATAAAACTAATTTTCGCACTGTAACGACTT	Gut_R1	GTTTGAGAATAGTGTAAATCTATAAGGTAGTAAAAC
Gut_R1_SP65	TATCGTGACTTACAGATTTGCGGGAGAGG	Gut_R1	GTTTGAGAATAGTGTAAATCTATAAGGTAGTAAAAC
Gut_R1_SP66	CTGTAACAGTTTCACCGACTGCAATCACA	Gut_R1	GTTTGAGAATAGTGTAAATCTATAAGGTAGTAAAAC
Gut_R1_SP67	AAAAGTAACACTTTTGATGTTGCTCTGTTT	Gut_R1	GTTTGAGAATAGTGTAAATCTATAAGGTAGTAAAAC
Gut_R1_SP68	CAATCCGCCGTCAACAAGCATTCGCTCTGC	Gut_R1	GTTTGAGAATAGTGTAAATCTATAAGGTAGTAAAAC
Gut_R1_SP69	TACGGTCTGCGTGAGAAAAGACAAAAAATGA	Gut_R1	GTTTGAGAATAGTGTAAATCTATAAGGTAGTAAAAC
Gut_R1_SP7	ATCGCGGATAAGATGCAGTATGTTCTTTCT	Gut_R1	GTTTGAGAATAGTGTAAATCTATAAGGTAGTAAAAC
Gut_R1_SP70	GTATGTATAACAATCTGTACACACTAACCT	Gut_R1	GTTTGAGAATAGTGTAAATCTATAAGGTAGTAAAAC
Gut_R1_SP71	TGGTAAACATCAGGACGGCGAATATCGTAT	Gut_R1	GTTTGAGAATAGTGTAAATCTATAAGGTAGTAAAAC
Gut_R1_SP72	GATCTTGTACTTATCGTCGGAAGAGGTACA	Gut_R1	GTTTGAGAATAGTGTAAATCTATAAGGTAGTAAAAC
Gut_R1_SP73	CATCTGCACCCATAAGTCCTAATCTATAAG	Gut_R1	GTTTGAGAATAGTGTAAATCTATAAGGTAGTAAAAC
Gut_R1_SP74	TTGTCGCAGATTATAACTGCACCTACGGTA	Gut_R1	GTTTGAGAATAGTGTAAATCTATAAGGTAGTAAAAC
Gut_R1_SP75	AACTGCACCAAGAACGATTGCCCTCATCTA	Gut_R1	GTTTGAGAATAGTGTAAATCTATAAGGTAGTAAAAC
Gut_R1_SP76	TAAAAATGTGATAATCAATAAGATAGAGTT	Gut_R1	GTTTGAGAATAGTGTAAATCTATAAGGTAGTAAAAC
Gut_R1_SP77	TATTATATGACTATAGGGCAACCTATGTAC	Gut_R1	GTTTGAGAATAGTGTAAATCTATAAGGTAGTAAAAC
Gut_R1_SP78	GTGTATTGTAAGCATACGCTGGACAAGGAT	Gut_R1	GTTTGAGAATAGTGTAAATCTATAAGGTAGTAAAAC
Gut_R1_SP79	AGTGCAAAAAATTAAAGAATTATACCCCTA	Gut_R1	GTTTGAGAATAGTGTAAATCTATAAGGTAGTAAAAC
Gut_R1_SP8	TTGACTGATTGACACGATACAACCTTAAA	Gut_R1	GTTTGAGAATAGTGTAAATCTATAAGGTAGTAAAAC
Gut_R1_SP80	CATATAGGTTATTTGTTGACTTACAATCCT	Gut_R1	GTTTGAGAATAGTGTAAATCTATAAGGTAGTAAAAC
Gut_R1_SP81	CTTGCATTTAAGAAACAGTTAATTACTTTG	Gut_R1	GTTTGAGAATAGTGTAAATCTATAAGGTAGTAAAAC
Gut_R1_SP82	AGAATTCATTTGGAATGTCCATTGTGAAGA	Gut_R1	GTTTGAGAATAGTGTAAATCTATAAGGTAGTAAAAC
Gut_R1_SP83	GGGGCAAATTGTAAATTTCAGTTTCGCCGT	Gut_R1	GTTTGAGAATAGTGTAAATCTATAAGGTAGTAAAAC
Gut_R1_SP84	CGTGCTCCATTCTGGAAAGTAAGATTCCGT	Gut_R1	GTTTGAGAATAGTGTAAATCTATAAGGTAGTAAAAC
Gut_R1_SP85	TGTTTTACTTTTTTAAATAAACAAAACATA	Gut_R1	GTTTGAGAATAGTGTAAATCTATAAGGTAGTAAAAC
Gut_R1_SP86	GGCGGTCTTGCCATAGAGTGTGGCGATGCA	Gut_R1	GTTTGAGAATAGTGTAAATCTATAAGGTAGTAAAAC
Gut_R1_SP87	GGTTCTTCTTTAGGATAACGGAATTCTTTG	Gut_R1	GTTTGAGAATAGTGTAAATCTATAAGGTAGTAAAAC
Gut_R1_SP88	AAAGTATGAACTTCAAGGCTCTCAACCTTT	Gut_R1	GTTTGAGAATAGTGTAAATCTATAAGGTAGTAAAAC
Gut_R1_SP89	TGCTCCCTTGCTCGGAGGCTTGGGCACACA	Gut_R1	GTTTGAGAATAGTGTAAATCTATAAGGTAGTAAAAC
Gut_R1_SP9	CGTCGCAGTTCTCAGCGTGGCGGATATAT	Gut_R1	GTTTGAGAATAGTGTAAATCTATAAGGTAGTAAAAC
Gut_R1_SP90	CCGGATTTTGCGTACCGTAGTCGATAGAGA	Gut_R1	GTTTGAGAATAGTGTAAATCTATAAGGTAGTAAAAC
Gut_R1_SP91	AATGACTTTTACAATACTTATAAAGATAGT	Gut_R1	GTTTGAGAATAGTGTAAATCTATAAGGTAGTAAAAC
Gut_R1_SP92	CGTCAACAGATTTTACATTTAATTCTACGC	Gut_R1	GTTTGAGAATAGTGTAAATCTATAAGGTAGTAAAAC
Gut_R1_SP93	ATTATAGTCAGCAAGAAATAAAAATGACTT	Gut_R1	GTTTGAGAATAGTGTAAATCTATAAGGTAGTAAAAC
Gut_R1_SP94	TTTAAAAAGTTGTGGATTTTCGTAAGGAAT	Gut_R1	GTTTGAGAATAGTGTAAATCTATAAGGTAGTAAAAC
Gut_R1_SP95	GAACTTCAAGGCTCTCAACCTTTTCTATTA	Gut_R1	GTTTGAGAATAGTGTAAATCTATAAGGTAGTAAAAC
Gut_R1_SP96	TAAAGTGCCTGTGTCAAGTGTCACCCTTG	Gut_R1	GTTTGAGAATAGTGTAAATCTATAAGGTAGTAAAAC
Gut_R1_SP97	ATAACCCTGATTGTCCTGTCCCTGTGAATA	Gut_R1	GTTTGAGAATAGTGTAAATCTATAAGGTAGTAAAAC
Gut_R1_SP98	CCCGACCTGCGAGCTGTGGCTGTGTGTGTT	Gut_R1	GTTTGAGAATAGTGTAAATCTATAAGGTAGTAAAAC
Gut_R1_SP99	AAAGGTATTGACAATCAGATAAATCTGTGG	Gut_R1	GTTTGAGAATAGTGTAAATCTATAAGGTAGTAAAAC
Gut_R10_SP1	CTGCTGGGTGATGTCGATCTGCCCGAGTACGA	Gut_R10	ATGTGCCCCGCGCCAGCGGGGATGAGCCG
Gut_R10_SP10	GCCGGGAAGCTCACACAATCGCCGTGCCGCGT	Gut_R10	ATGTGCCCCGCGCCAGCGGGGATGAGCCG
Gut_R10_SP100	GTGATGAGGAAAAGCTAATAGAATGGCGACGC	Gut_R10	ATGTGCCCCGCGCCAGCGGGGATGAGCCG
Gut_R10_SP101	CGCGAGAGCCAGCAAAACGCCAGGGCACAAAA	Gut_R10	ATGTGCCCCGCGCCAGCGGGGATGAGCCG
Gut_R10_SP102	TGTTGTTTTTCTGCCGGATTAACGCGGTGCGA	Gut_R10	ATGTGCCCCGCGCCAGCGGGGATGAGCCG
Gut_R10_SP103	TTCCGCGACCCGGCGATAAGGGAAGATGGGTG	Gut_R10	ATGTGCCCCGCGCCAGCGGGGATGAGCCG
Gut_R10_SP104	CGTCCGCAACGATAATTTCTTTGCGGAATTTT	Gut_R10	ATGTGCCCCGCGCCAGCGGGGATGAGCCG
Gut_R10_SP105	GCCCGTCTATCGCTAACCCCACTGTCGGTGTT	Gut_R10	ATGTGCCCCGCGCCAGCGGGGATGAGCCG
Gut_R10_SP106	ATCGTCCACCGGGAGACTTCGAACAATAGAGC	Gut_R10	ATGTGCCCCGCGCCAGCGGGGATGAGCCG
Gut_R10_SP107	ATACGTCCCAGCCCATTGTTTTCTCCTTTATC	Gut_R10	ATGTGCCCCGCGCCAGCGGGGATGAGCCG
Gut_R10_SP108	CAATTATTTTCATGAGTTAGACGATCAGCGCC	Gut_R10	ATGTGCCCCGCGCCAGCGGGGATGAGCCG
Gut_R10_SP109	ACTTCGTCAACGAAATTGTCTGCTACCGCTAC	Gut_R10	ATGTGCCCCGCGCCAGCGGGGATGAGCCG
Gut_R10_SP11	ATCGCTGGTCTGCGAAAACGCGCGCCCGAAGA	Gut_R10	ATGTGCCCCGCGCCAGCGGGGATGAGCCG
Gut_R10_SP110	AGTGTTTCTTCTGTTGGGTGGATGCAGTTTGG	Gut_R10	ATGTGCCCCGCGCCAGCGGGGATGAGCCG
Gut_R10_SP111	GTCTAACCGCTGGTTTTGTTCTCTGGTCGCCC	Gut_R10	ATGTGCCCCGCGCCAGCGGGGATGAGCCG
Gut_R10_SP112	GCGTCCGTCAAAGAGGAAGCCAAAGCCATGCA	Gut_R10	ATGTGCCCCGCGCCAGCGGGGATGAGCCG
Gut_R10_SP113	GGTATGTCGTTCCGTGTCGATGGTGAGCCGGT	Gut_R10	ATGTGCCCCGCGCCAGCGGGGATGAGCCG
Gut_R10_SP114	CTGACCAGTACGGTCATGAGTGCTGCGGCGAC	Gut_R10	ATGTGCCCCGCGCCAGCGGGGATGAGCCG
Gut_R10_SP115	AGCAGATACACGGCTTTGTATTCCGTGCGCCC	Gut_R10	ATGTGCCCCGCGCCAGCGGGGATGAGCCG
Gut_R10_SP116	TTGCAAACCGTGGCAAACGCAATTAACAAAAA	Gut_R10	ATGTGCCCCGCGCCAGCGGGGATGAGCCG
Gut_R10_SP117	TTTTACTGTTCTCGTCGGGGGGATGAGGAAGC	Gut_R10	ATGTGCCCCGCGCCAGCGGGGATGAGCCG
Gut_R10_SP118	GCAAATTAAGCTGGCTGGCAATCTCTTTCGGG	Gut_R10	ATGTGCCCCGCGCCAGCGGGGATGAGCCG
Gut_R10_SP119	GCGTCGCTGGAAGAACAAAACCGCCTGATCGA	Gut_R10	ATGTGCCCCGCGCCAGCGGGGATGAGCCG
Gut_R10_SP12	CGGATGATCGCACCAATATTTGCTGTTTGCGC	Gut_R10	ATGTGCCCCGCGCCAGCGGGGATGAGCCG
Gut_R10_SP120	CGTGCCTTCGACTTTGCGGATCACGTCGTCTT	Gut_R10	ATGTGCCCCGCGCCAGCGGGGATGAGCCG
Gut_R10_SP121	AGATCGCGCCACGAGGAAACGAATATGAACGG	Gut_R10	ATGTGCCCCGCGCCAGCGGGGATGAGCCG
Gut_R10_SP122	AGATTTGTAGAAAAATAGTCATTCTCTGCCTG	Gut_R10	ATGTGCCCCGCGCCAGCGGGGATGAGCCG
Gut_R10_SP123	GTGGATAAGGCCATCGCTGATCTTGGCGACGG	Gut_R10	ATGTGCCCCGCGCCAGCGGGGATGAGCCG
Gut_R10_SP124	CTGCGACAAATACTTTCACCCTCTAGGAATCA	Gut_R10	ATGTGCCCCGCGCCAGCGGGGATGAGCCG
Gut_R10_SP125	AATCTATTGTGAATTTGAAATGGTCCAGCACT	Gut_R10	ATGTGCCCCGCGCCAGCGGGGATGAGCCG
Gut_R10_SP126	GTGACGGGCGTGTCGTACGTGTTGACCGGTGA	Gut_R10	ATGTGCCCCGCGCCAGCGGGGATGAGCCG
Gut_R10_SP127	GTTTACCGCCCCGCAGAGGCGCTGGCAGATCC	Gut_R10	ATGTGCCCCGCGCCAGCGGGGATGAGCCG
Gut_R10_SP128	TTGTGCGAACCTCAGTTATTGTGCCCTGACGA	Gut_R10	ATGTGCCCCGCGCCAGCGGGGATGAGCCG
Gut_R10_SP129	GCTAAATGCAATAGGTATTGAGTGGGAAATTA	Gut_R10	ATGTGCCCCGCGCCAGCGGGGATGAGCCG
Gut_R10_SP13	CCACTCGCCCACAGTTGGTGTTGTTGTGGGCA	Gut_R10	ATGTGCCCCGCGCCAGCGGGGATGAGCCG
Gut_R10_SP130	CGCCCCTGCGGATCGACACCCTGTTTATCAAA	Gut_R10	ATGTGCCCCGCGCCAGCGGGGATGAGCCG
Gut_R10_SP131	GCTCCCTGTCAGTTGTAATCGATAACGTTGAT	Gut_R10	ATGTGCCCCGCGCCAGCGGGGATGAGCCG
Gut_R10_SP132	CACCCAGGCCAGTCAGGTGGAGCAGGAGCCGC	Gut_R10	ATGTGCCCCGCGCCAGCGGGGATGAGCCG
Gut_R10_SP133	ATGTAGGGGCAATCGAACGATTCTCTGCCGAC	Gut_R10	ATGTGCCCCGCGCCAGCGGGGATGAGCCG
Gut_R10_SP134	GCGCGAGCCCACTCCGGCGTCAAGGAGTGGAA	Gut_R10	ATGTGCCCCGCGCCAGCGGGGATGAGCCG
Gut_R10_SP135	GGCGGGCCGTTGGCTAAACGCTGCGATCTGCC	Gut_R10	ATGTGCCCCGCGCCAGCGGGGATGAGCCG
Gut_R10_SP136	CCGTGCGGGATTTGTTCAAGGGCAGCTTAAA	Gut_R10	ATGTGCCCCGCGCCAGCGGGGATGAGCCG
Gut_R10_SP137	GGACGCCCAGGAAAAGGACATTGCAGCGTCAT	Gut_R10	ATGTGCCCCGCGCCAGCGGGGATGAGCCG
Gut_R10_SP138	GGATCAAATCTTTTGAGAGCAATTAAGGGGGA	Gut_R10	ATGTGCCCCGCGCCAGCGGGGATGAGCCG
Gut_R10_SP139	CCGCGCAAATCCAGCGAGCCGCCGACGCTCA	Gut_R10	ATGTGCCCCGCGCCAGCGGGGATGAGCCG
Gut_R10_SP14	GTAATCCCGGCGGGGATACCTGGTACTGGCGA	Gut_R10	ATGTGCCCCGCGCCAGCGGGGATGAGCCG
Gut_R10_SP140	CCACCCCGGCCCCCTCGGAGGGCGAAAACGACG	Gut_R10	ATGTGCCCCGCGCCAGCGGGGATGAGCCG
Gut_R10_SP141	CAGGATTGAAATACAGCCTCGGCCTGGGACAG	Gut_R10	ATGTGCCCCGCGCCAGCGGGGATGAGCCG
Gut_R10_SP142	CCATTCTTGTTGTCGTTCATCAAGCGCAGGGG	Gut_R10	ATGTGCCCCGCGCCAGCGGGGATGAGCCG
Gut_R10_SP143	GACGATGAGACGCCCTGGTGTGCCGCGTTCGT	Gut_R10	ATGTGCCCCGCGCCAGCGGGGATGAGCCG
Gut_R10_SP144	TTGCTCATTAATCGCGGCCAACGCACCAACCA	Gut_R10	ATGTGCCCCGCGCCAGCGGGGATGAGCCG
Gut_R10_SP145	ACGCCGAAAACGGTTGGTGCGTATAGCGATAT	Gut_R10	ATGTGCCCCGCGCCAGCGGGGATGAGCCG
Gut_R10_SP146	ATGAGGTGAGCGCGATGAGGCGGAAGTGTGCC	Gut_R10	ATGTGCCCCGCGCCAGCGGGGATGAGCCG
Gut_R10_SP147	CGGCTGTCCGCGTTGTTGTAGATGACCAGCAC	Gut_R10	ATGTGCCCCGCGCCAGCGGGGATGAGCCG
Gut_R10_SP148	ATTGTTATAATTATTTATTGAAATATCATTCC	Gut_R10	ATGTGCCCCGCGCCAGCGGGGATGAGCCG
Gut_R10_SP149	CTAACCGCATCTCCCAGGAAGCAGGCCTCGCA	Gut_R10	ATGTGCCCCGCGCCAGCGGGGATGAGCCG
Gut_R10_SP15	GGCGTCATCATCAAACAGGGCGTCTAACAGCG	Gut_R10	ATGTGCCCCGCGCCAGCGGGGATGAGCCG
Gut_R10_SP150	CAGGTATCCGGTGAGTTTGGCGATATTGATCT	Gut_R10	ATGTGCCCCGCGCCAGCGGGGATGAGCCG
Gut_R10_SP151	CCGAGCCCGATTATCGGCATGAGCGATGCGGA	Gut_R10	ATGTGCCCCGCGCCAGCGGGGATGAGCCG
Gut_R10_SP152	CGGCCAGAACAAGCTGTTTCGCGAGCTGCGGA	Gut_R10	ATGTGCCCCGCGCCAGCGGGGATGAGCCG
Gut_R10_SP153	GATCCCAGGATAAAAGGGCTTTCGTACCGTCA	Gut_R10	ATGTGCCCCGCGCCAGCGGGGATGAGCCG
Gut_R10_SP154	TCGAAGAAGAAAGGGAAATAATGCGAGGAACG	Gut_R10	ATGTGCCCCGCGCCAGCGGGGATGAGCCG
Gut_R10_SP155	TACAATGCCATTGAGGTTCCTGCCGTCTCGGG	Gut_R10	ATGTGCCCCGCGCCAGCGGGGATGAGCCG
Gut_R10_SP156	CACTGACAGTGAAGCTGAATTACAGGCAGAGG	Gut_R10	ATGTGCCCCGCGCCAGCGGGGATGAGCCG
Gut_R10_SP157	TGGCGCATTGTCTGAGGGCGTAGTCGCTCCTC	Gut_R10	ATGTGCCCCGCGCCAGCGGGGATGAGCCG
Gut_R10_SP158	TCCAGCAGGGTTGCTGAGCACCATCTCAGTAG	Gut_R10	ATGTGCCCCGCGCCAGCGGGGATGAGCCG
Gut_R10_SP159	GCCTCGAACGTCCAGCATGGTATCGCCGATGA	Gut_R10	ATGTGCCCCGCGCCAGCGGGGATGAGCCG
Gut_R10_SP16	GTGTGGGACGGGCTGAAAGGCATCGTCGAAGG	Gut_R10	ATGTGCCCCGCGCCAGCGGGGATGAGCCG
Gut_R10_SP160	TTCAGGGTGTGATTCCGCATACCAAGCATTAA	Gut_R10	ATGTGCCCCGCGCCAGCGGGGATGAGCCG
Gut_R10_SP161	CGCGTCGGAGTCGTCCTCCAAGAGGGTGAACA	Gut_R10	ATGTGCCCCGCGCCAGCGGGGATGAGCCG
Gut_R10_SP162	TGTCGGGAAACGCCGATAGCCTTAGCGATACC	Gut_R10	ATGTGCCCCGCGCCAGCGGGGATGAGCCG
Gut_R10_SP163	CGGCTTGTTTAATTGCGTGGAACGTCTCAATT	Gut_R10	ATGTGCCCCGCGCCAGCGGGGATGAGCCG
Gut_R10_SP164	GATACTCCGTTGGGGATTGTGAAGGATTTCAA	Gut_R10	ATGTGCCCCGCGCCAGCGGGGATGAGCCG
Gut_R10_SP165	ACGGCGTGGATTGAGGGACGGGTATTTGGTCC	Gut_R10	ATGTGCCCCGCGCCAGCGGGGATGAGCCG
Gut_R10_SP166	CCGTCGCCGCGTGCACGTCTTTTGATTAAGGA	Gut_R10	ATGTGCCCCGCGCCAGCGGGGATGAGCCG
Gut_R10_SP167	AAATGAATCTGTGGACGATCCCAGATGATCCG	Gut_R10	ATGTGCCCCGCGCCAGCGGGGATGAGCCG
Gut_R10_SP168	CACCAGATATAGGGCCAAGCAGGCCAGAAAGA	Gut_R10	ATGTGCCCCGCGCCAGCGGGGATGAGCCG
Gut_R10_SP169	ACCCACGCTTCATCAACGAAGTTGAGATCGGA	Gut_R10	ATGTGCCCCGCGCCAGCGGGGATGAGCCG
Gut_R10_SP17	ACAGGCCGATCTTGATAGCTGTTCTGTGTGCT	Gut_R10	ATGTGCCCCGCGCCAGCGGGGATGAGCCG
Gut_R10_SP170	TCACAGAAGTAACCCGCTGCACAATGCTATGA	Gut_R10	ATGTGCCCCGCGCCAGCGGGGATGAGCCG
Gut_R10_SP171	AAGCAGCGCGCCTCCGTCGCCGTTGAGCCAGG	Gut_R10	ATGTGCCCCGCGCCAGCGGGGATGAGCCG
Gut_R10_SP172	GAACTCGGCCGCGTAGCCGATGTAATCCACAA	Gut_R10	ATGTGCCCCGCGCCAGCGGGGATGAGCCG
Gut_R10_SP173	CCTGCGTCGCAGAGGCGCAGGAGAAATAAGCC	Gut_R10	ATGTGCCCCGCGCCAGCGGGGATGAGCCG
Gut_R10_SP174	AATTCGCGGAGCACATCCTAGACGCTGTGGAG	Gut_R10	ATGTGCCCCGCGCCAGCGGGGATGAGCCG
Gut_R10_SP175	GCGAGGAAGACGTCGGAGTAGATGTCTTTGAG	Gut_R10	ATGTGCCCCGCGCCAGCGGGGATGAGCCG
Gut_R10_SP176	TACAGTACAGCTAAGGGCGTCCGATGGCGTGT	Gut_R10	ATGTGCCCCGCGCCAGCGGGGATGAGCCG
Gut_R10_SP177	TAGGTAAATCACAGCTATTTGATAAGGGCGTGT	Gut_R10	ATGTGCCCCGCGCCAGCGGGGATGAGCCG
Gut_R10_SP178	ACTTTCCGCCCCTCCACAGCGTCTAGGATGTGC	Gut_R10	ATGTGCCCCGCGCCAGCGGGGATGAGCCG
Gut_R10_SP179	GACTAGCGGCACGAATTGGGGTCTCAGGGCTG	Gut_R10	ATGTGCCCCGCGCCAGCGGGGATGAGCCG
Gut_R10_SP18	TTTTGATTTCATTAACGGCGCTCCCCATATTT	Gut_R10	ATGTGCCCCGCGCCAGCGGGGATGAGCCG
Gut_R10_SP180	ATAGTCACCCGCCAAATCCGGGTGATCCTTTT	Gut_R10	ATGTGCCCCGCGCCAGCGGGGATGAGCCG
Gut_R10_SP181	GAAAAACCATGGCTAAACAAGAATCTCCCGAC	Gut_R10	ATGTGCCCCGCGCCAGCGGGGATGAGCCG
Gut_R10_SP182	CACCGGCATGCCACGCCGTATCCCGGTCGTAG	Gut_R10	ATGTGCCCCGCGCCAGCGGGGATGAGCCG
Gut_R10_SP183	ACCAAAAACAGCAAGCCCGTTAGGCGACGACA	Gut_R10	ATGTGCCCCGCGCCAGCGGGGATGAGCCG
Gut_R10_SP184	CTGACGGCCCAGGCGGCCCGGCGCAGCTCAGG	Gut_R10	ATGTGCCCCGCGCCAGCGGGGATGAGCCG
Gut_R10_SP185	CCCCCAACCTGTGGGGGCCACTTATGCGAGAA	Gut_R10	ATGTGCCCCGCGCCAGCGGGGATGAGCCG
Gut_R10_SP186	GGCGAGCTTCCACTCGTCTCGACGGGCGCCAG	Gut_R10	ATGTGCCCCGCGCCAGCGGGGATGAGCCG
Gut_R10_SP19	TGCGCCGTAGCGTGTCCACCTATTGTAGTAAA	Gut_R10	ATGTGCCCCGCGCCAGCGGGGATGAGCCG
Gut_R10_SP2	CGGGCATAGGCTCAGCCGCGGACATCCTCTCC	Gut_R10	ATGTGCCCCGCGCCAGCGGGGATGAGCCG
Gut_R10_SP20	GACAGCCAAATGATCGGTGACCAGGAACGACA	Gut_R10	ATGTGCCCCGCGCCAGCGGGGATGAGCCG
Gut_R10_SP21	GCGCTGATGGACATGCTCACCGAATTGGACGA	Gut_R10	ATGTGCCCCGCGCCAGCGGGGATGAGCCG
Gut_R10_SP22	ACTCGTGTGCGATGTCTGCGCCGATCGGCATT	Gut_R10	ATGTGCCCCGCGCCAGCGGGGATGAGCCG
Gut_R10_SP23	TCCCTAAAAAATCGTTTACACTCCGCCATAAA	Gut_R10	ATGTGCCCCGCGCCAGCGGGGATGAGCCG
Gut_R10_SP24	GCCACGGCGATCCGGCAGAGATTGTTGATGCT	Gut_R10	ATGTGCCCCGCGCCAGCGGGGATGAGCCG
Gut_R10_SP25	TTCGCGCGCTCCTTCTCGAACTCGGCGCGCTC	Gut_R10	ATGTGCCCCGCGCCAGCGGGGATGAGCCG
Gut_R10_SP26	GCGGCAAAGCCATCTACAGCTACCACAGTGGG	Gut_R10	ATGTGCCCCGCGCCAGCGGGGATGAGCCG
Gut_R10_SP27	TCACTCCCAGCGTCAAAAAAACCAGGCAAAGG	Gut_R10	ATGTGCCCCGCGCCAGCGGGGATGAGCCG
Gut_R10_SP28	AGCGCCTTGACTTACCTGCTGTGCCTGCTGTG	Gut_R10	ATGTGCCCCGCGCCAGCGGGGATGAGCCG
Gut_R10_SP29	TGTTTTTCGTCGTAATTTTGTCGTAGTATAGC	Gut_R10	ATGTGCCCCGCGCCAGCGGGGATGAGCCG
Gut_R10_SP3	ATGGTCTGCGCTGCCGATGACGGTGACGGGAA	Gut_R10	ATGTGCCCCGCGCCAGCGGGGATGAGCCG
Gut_R10_SP30	GAGTCTAAAGTAGCGAAAAAGAGCATGAAGGA	Gut_R10	ATGTGCCCCGCGCCAGCGGGGATGAGCCG
Gut_R10_SP31	TCTTTGTTTTGGATAATTTCAGCGTAAATGCT	Gut_R10	ATGTGCCCCGCGCCAGCGGGGATGAGCCG
Gut_R10_SP32	AACGGTAGAAGTACTCGACAAAGCACTCGCCA	Gut_R10	ATGTGCCCCGCGCCAGCGGGGATGAGCCG
Gut_R10_SP33	TGGGTGCTCCCTGTACGGTTTGCCACGATCAG	Gut_R10	ATGTGCCCCGCGCCAGCGGGGATGAGCCG
Gut_R10_SP34	GGAAAATAAACGCGTTATTCCTTGATGGGTGC	Gut_R10	ATGTGCCCCGCGCCAGCGGGGATGAGCCG
Gut_R10_SP35	GGCGAGTTCGTTCTGAATAAAGAGACGGTGGA	Gut_R10	ATGTGCCCCGCGCCAGCGGGGATGAGCCG
Gut_R10_SP36	CGTAGTTTCGGCAGTCCAGTGCCTCGTTACGT	Gut_R10	ATGTGCCCCGCGCCAGCGGGGATGAGCCG
Gut_R10_SP37	ACCCCGGCAGTGTCTGTTTGACTAATTTATGC	Gut_R10	ATGTGCCCCGCGCCAGCGGGGATGAGCCG
Gut_R10_SP38	GCTATGCGGCTTATCGCCCCCCAGGCGAAGGT	Gut_R10	ATGTGCCCCGCGCCAGCGGGGATGAGCCG
Gut_R10_SP39	GCTGATGGTCTGGGAGTGTCCATCGGGCAACTGA	Gut_R10	ATGTGCCCCGCGCCAGCGGGGATGAGCCG
Gut_R10_SP4	AGCGGCTTGCAACTTCGTAAAAGCATCCTCAG	Gut_R10	ATGTGCCCCGCGCCAGCGGGGATGAGCCG
Gut_R10_SP40	ATACGATTTGAATACCCACTCTTGGAACTTTC	Gut_R10	ATGTGCCCCGCGCCAGCGGGGATGAGCCG
Gut_R10_SP41	AGTGTTGCGGAGGTTGAGTTGAGCACCTATCC	Gut_R10	ATGTGCCCCGCGCCAGCGGGGATGAGCCG
Gut_R10_SP42	GTGATGCCGAACACGCCAAATATCTCGCAAGCGA	Gut_R10	ATGTGCCCCGCGCCAGCGGGGATGAGCCG
Gut_R10_SP43	ATCCTGCAGAAGGTGGACCGGCAGAGCCAGCT	Gut_R10	ATGTGCCCCGCGCCAGCGGGGATGAGCCG
Gut_R10_SP44	AGGAGGCCGGTGTGGATCGCGCCGCACACCGC	Gut_R10	ATGTGCCCCGCGCCAGCGGGGATGAGCCG
Gut_R10_SP45	GGATGACCTGTCGCTAAAACTCGCCGCGTACA	Gut_R10	ATGTGCCCCGCGCCAGCGGGGATGAGCCG
Gut_R10_SP46	TCCGTTTGGTCCACCAAATGTTTGATGCTTCA	Gut_R10	ATGTGCCCCGCGCCAGCGGGGATGAGCCG
Gut_R10_SP47	TATTGTTGACTGCTACGAATACGCAGACGAGC	Gut_R10	ATGTGCCCCGCGCCAGCGGGGATGAGCCG
Gut_R10_SP48	CGAAAAAAGGCGCGCTCAAAAACGGTGCGATC	Gut_R10	ATGTGCCCCGCGCCAGCGGGGATGAGCCG
Gut_R10_SP49	GCGACGATACCTGTGCGAGCTGAATAAAATAA	Gut_R10	ATGTGCCCCGCGCCAGCGGGGATGAGCCG
Gut_R10_SP5	ACATCCGTGTGCCCGGGTTGGGGTAACGTCAC	Gut_R10	ATGTGCCCCGCGCCAGCGGGGATGAGCCG
Gut_R10_SP50	AGCAACAGGTATTTCATATGGCCTGCCGTGCT	Gut_R10	ATGTGCCCCGCGCCAGCGGGGATGAGCCG
Gut_R10_SP51	TGGTGGGATAGCTGCTCTGCCAGCGTGTCGCG	Gut_R10	ATGTGCCCCGCGCCAGCGGGGATGAGCCG
Gut_R10_SP52	TGGGCGCAGCTCATGTATTCCAATGAGGATAT	Gut_R10	ATGTGCCCCGCGCCAGCGGGGATGAGCCG
Gut_R10_SP53	CTGCGCGACCAACGGGAACAGGGCAAATGTGA	Gut_R10	ATGTGCCCCGCGCCAGCGGGGATGAGCCG
Gut_R10_SP54	GGATTCTGCACTCTTTGATGTAATGGTACTGC	Gut_R10	ATGTGCCCCGCGCCAGCGGGGATGAGCCG
Gut_R10_SP55	TAAACGCACCTGGCGCGCCACTTTATCAACAA	Gut_R10	ATGTGCCCCGCGCCAGCGGGGATGAGCCG
Gut_R10_SP56	GGTGGGATGTTATCGGCGGCTACGTGGATAAA	Gut_R10	ATGTGCCCCGCGCCAGCGGGGATGAGCCG
Gut_R10_SP57	TTGTCGGGCTTGTTCGGCGCGGGTTGTTAACT	Gut_R10	ATGTGCCCCGCGCCAGCGGGGATGAGCCG
Gut_R10_SP58	CAGGTCGACCGACTGGAGGCGGAGATTGTCGG	Gut_R10	ATGTGCCCCGCGCCAGCGGGGATGAGCCG
Gut_R10_SP59	GACACGGATAACAGCTACCTGCAAAATTTAAT	Gut_R10	ATGTGCCCCGCGCCAGCGGGGATGAGCCG
Gut_R10_SP6	TAGTTATCCACTTTCAGAGCTTGGGAGTAGAC	Gut_R10	ATGTGCCCCGCGCCAGCGGGGATGAGCCG
Gut_R10_SP60	TTCTCCAATCAGCAGTGCCCATCTGATATGCA	Gut_R10	ATGTGCCCCGCGCCAGCGGGGATGAGCCG
Gut_R10_SP61	AATATGTATCTGAGCAGACCAGTACCCAGATT	Gut_R10	ATGTGCCCCGCGCCAGCGGGGATGAGCCG
Gut_R10_SP62	TTACCGAGCGTCACGAAACAGACAACACCAGG	Gut_R10	ATGTGCCCCGCGCCAGCGGGGATGAGCCG
Gut_R10_SP63	TCAGGGGAATTGCGATATTCAGGCAGCGTAAC	Gut_R10	ATGTGCCCCGCGCCAGCGGGGATGAGCCG
Gut_R10_SP64	GTTTCTCATATTTCGCGTCAATCTCCACCAGG	Gut_R10	ATGTGCCCCGCGCCAGCGGGGATGAGCCG
Gut_R10_SP65	AGGTTGACGTTGATTTTGTTCGTTATGTTGCC	Gut_R10	ATGTGCCCCGCGCCAGCGGGGATGAGCCG
Gut_R10_SP66	GTAACCTCTGGGTGTCCATAATTCGCGTATAA	Gut_R10	ATGTGCCCCGCGCCAGCGGGGATGAGCCG
Gut_R10_SP67	CAGTTATAACCCCGCGCCGTGCTGCTGAAACA	Gut_R10	ATGTGCCCCGCGCCAGCGGGGATGAGCCG
Gut_R10_SP68	TGGTTTGAGCCGTTTAAAGTTGAACAGGCGAC	Gut_R10	ATGTGCCCCGCGCCAGCGGGGATGAGCCG
Gut_R10_SP69	TACCGAAATTCGAGGTCAAATACCCCGAATTA	Gut_R10	ATGTGCCCCGCGCCAGCGGGGATGAGCCG
Gut_R10_SP7	ACCTAAAGCCGGCCATTGGGTTGGCTTACTCG	Gut_R10	ATGTGCCCCGCGCCAGCGGGGATGAGCCG
Gut_R10_SP70	GCTTTCAGTCGAGTGGCAGCTACGAGGAATCG	Gut_R10	ATGTGCCCCGCGCCAGCGGGGATGAGCCG
Gut_R10_SP71	GCAATTTGTTGTCCGCGATCCGGTACGCGCGT	Gut_R10	ATGTGCCCCGCGCCAGCGGGGATGAGCCG
Gut_R10_SP72	CGTATTCGACGCTATCGTTGCGGGCGGTTTGA	Gut_R10	ATGTGCCCCGCGCCAGCGGGGATGAGCCG
Gut_R10_SP73	TATGCCTCTTTTAAACGCGCCGCCTTTTTGCC	Gut_R10	ATGTGCCCCGCGCCAGCGGGGATGAGCCG
Gut_R10_SP74	CGGCTATGGAATTTATGGAGAAGTTTGGTTTT	Gut_R10	ATGTGCCCCGCGCCAGCGGGGATGAGCCG
Gut_R10_SP75	ACGAAAATCGCCGCCGGAGTCCTCGCTGATCA	Gut_R10	ATGTGCCCCGCGCCAGCGGGGATGAGCCG
Gut_R10_SP76	GCAGCAGATTTACAAACAGATCGGAGATTACTGA	Gut_R10	ATGTGCCCCGCGCCAGCGGGGATGAGCCG
Gut_R10_SP77	CTATAGCAGCACTCCACCAGCTCGAGCAGCAG	Gut_R10	ATGTGCCCCGCGCCAGCGGGGATGAGCCG
Gut_R10_SP78	CAAAAAAATAATATCCGGCAGTCTGTACGGTA	Gut_R10	ATGTGCCCCGCGCCAGCGGGGATGAGCCG
Gut_R10_SP79	CAAAAAAATAGATTGGAAAACATTTAGATTCA	Gut_R10	ATGTGCCCCGCGCCAGCGGGGATGAGCCG
Gut_R10_SP8	GCGTGACTCTGTCTGCTCTTTAATGGCCTCGC	Gut_R10	ATGTGCCCCGCGCCAGCGGGGATGAGCCG
Gut_R10_SP80	TCGGTTTGCGCGTATTGTTGTTCGGGGTCTAT	Gut_R10	ATGTGCCCCGCGCCAGCGGGGATGAGCCG
Gut_R10_SP81	TTGCCCGGCGCACAGGTGCACATCCCGGAAAA	Gut_R10	ATGTGCCCCGCGCCAGCGGGGATGAGCCG
Gut_R10_SP82	GTCCACGGTTCGACGCCTACCGCCGCAGCTAT	Gut_R10	ATGTGCCCCGCGCCAGCGGGGATGAGCCG
Gut_R10_SP83	TGGGGCTGAGCATGGCTAAACAACCGAGGCGC	Gut_R10	ATGTGCCCCGCGCCAGCGGGGATGAGCCG
Gut_R10_SP84	ATACCCATCGATAGCCTCGACGGCCTCCATGA	Gut_R10	ATGTGCCCCGCGCCAGCGGGGATGAGCCG
Gut_R10_SP85	GACTCACCCCGAAAGAGATTGCCAGCCAGCTT	Gut_R10	ATGTGCCCCGCGCCAGCGGGGATGAGCCG
Gut_R10_SP86	ATTATGGTTGATCTGTCTGTACAGAATGAGGC	Gut_R10	ATGTGCCCCGCGCCAGCGGGGATGAGCCG
Gut_R10_SP87	AATGCAGTACGCGCCGGATCCGGTGTTACGTC	Gut_R10	ATGTGCCCCGCGCCAGCGGGGATGAGCCG
Gut_R10_SP88	CTGGAGCTGGAAAAACCGGAGGGGTTAGATCC	Gut_R10	ATGTGCCCCGCGCCAGCGGGGATGAGCCG
Gut_R10_SP89	ACGGACAAAATATATATTGATTTGCGAATTAT	Gut_R10	ATGTGCCCCGCGCCAGCGGGGATGAGCCG
Gut_R10_SP9	CCCACCTGCTGGATATGCGGACAACCCATAGA	Gut_R10	ATGTGCCCCGCGCCAGCGGGGATGAGCCG
Gut_R10_SP90	TCGGGGCCGTACCTACAGCGCGGAAGGTGAAC	Gut_R10	ATGTGCCCCGCGCCAGCGGGGATGAGCCG
Gut_R10_SP91	CTTGCTGCGACTGCCTGGTACAGCATCTATGA	Gut_R10	ATGTGCCCCGCGCCAGCGGGGATGAGCCG
Gut_R10_SP92	AAACCGGACGAGGGCGCGCTAAAACGTGATTAGA	Gut_R10	ATGTGCCCCGCGCCAGCGGGGATGAGCCG
Gut_R10_SP93	CTGGCAGCACTGCGGGAAATATTGTTGCTGCT	Gut_R10	ATGTGCCCCGCGCCAGCGGGGATGAGCCG
Gut_R10_SP94	GATGCAAACGTAAAGCACACATTTTCTGGCAG	Gut_R10	ATGTGCCCCGCGCCAGCGGGGATGAGCCG
Gut_R10_SP95	GGGGGCGCATGACCGTAAACATTATCCCCCGG	Gut_R10	ATGTGCCCCGCGCCAGCGGGGATGAGCCG
Gut_R10_SP96	GGCTGGTGGGTTCGGGTAACTGGTTTGCTGTC	Gut_R10	ATGTGCCCCGCGCCAGCGGGGATGAGCCG
Gut_R10_SP97	ACACGGGGCAGATTGAGCAGGACTGCGACCTC	Gut_R10	ATGTGCCCCGCGCCAGCGGGGATGAGCCG
Gut_R10_SP98	ATTTGGGGGTATGAGAGCGCCGAGCCGTTCGG	Gut_R10	ATGTGCCCCGCGCCAGCGGGGATGAGCCG
Gut_R10_SP99	AACTGCGGGCGGTTGAGTCTGTGCAGGCTCGC	Gut_R10	ATGTGCCCCGCGCCAGCGGGGATGAGCCG
Gut_R100_SP1	GTCCTCATTAGATTTTCTTGTCCTCATAACCAAA	Gut_R100	ATTACAATTTATCCCCGCAAGGGGACGGAAAC
Gut_R100_SP2	AGGTCTACCTTTAAGGTGATAATCTGTTCCATGC	Gut_R100	ATTACAATTTATCCCCGCAAGGGGACGGAAAC
Gut_R100_SP3	AGCCGGTCAATCCGCCCAGAAGCCTGCTCCATGAC	Gut_R100	ATTACAATTTATCCCCGCAAGGGGACGGAAAC
Gut_R100_SP4	TCGTGCGTATCCACTGCCACATCCAGCTTGTTCCC	Gut_R100	ATTACAATTTATCCCCGCAAGGGGACGGAAAC
Gut_R1000_SP1	GAATCCATTGATGCAGTACCATTTTTACCAGTACCA	Gut_R1000	ATTTCAATACATCTAATGTTATTAATCAAC
Gut_R1000_SP2	CTGTAAGTTTAGAGTTTTACGAAAGGTATTTATA	Gut_R1000	ATTTCAATACATCTAATGTTATTAATCAAC
Gut_R1000_SP3	ATCTTCTTGGTGAGTCATCTCCCTTAGTCCCCAAGC	Gut_R1000	ATTTCAATACATCTAATGTTATTAATCAAC
Gut_R1000_SP4	CCAAGATGATAAAGCTTGACGAAGAAGCTCTCATTTG	Gut_R1000	ATTTCAATACATCTAATGTTATTAATCAAC
Gut_R1000_SP5	GTAGAATCTAAATCGTTATAAACAACGTCAAGTCCGT	Gut_R1000	ATTTCAATACATCTAATGTTATTAATCAAC
Gut_R1000_SP6	ACCGATAAGGATAATGGGATAGTAGCTACTTACAA	Gut_R1000	ATTTCAATACATCTAATGTTATTAATCAAC
Gut_R1000_SP7	AGAGAGATTATTAAAAATAATAAGAATTTAGAAGAA	Gut_R1000	ATTTCAATACATCTAATGTTATTAATCAAC
Gut_R1000_SP8	ATGTAATAGAGCTTGGACAACATCAAGTTCCTGGTG	Gut_R1000	ATTTCAATACATCTAATGTTATTAATCAAC
Gut_R1001_SP1	CAACGCCTAAACCTCTAAGCCATTCTATACA	Gut_R1001	GTTGATTACTAACATTAGATGTATTGAAATTAAA
Gut_R1001_SP10	GAACAATATCAATAGATAAAACAACAATAAAAG	Gut_R1001	GTTGATTACTAACATTAGATGTATTGAAATTAAA
Gut_R1001_SP11	TCGGTTTATTAATATTCTTGCCAAACTTATCC	Gut_R1001	GTTGATTACTAACATTAGATGTATTGAAATTAAA
Gut_R1001_SP12	CTCCTCAATACAATTATTATTATATTTTTCAA	Gut_R1001	GTTGATTACTAACATTAGATGTATTGAAATTAAA
Gut_R1001_SP13	TAGATTATTTGCTTAAGAATTATAAAAAATT	Gut_R1001	GTTGATTACTAACATTAGATGTATTGAAATTAAA
Gut_R1001_SP14	AATAATAAGTATTAATATGGCAACCTAAAA	Gut_R1001	GTTGATTACTAACATTAGATGTATTGAAATTAAA
Gut_R1001_SP2	CAAAAGGAAAAAGGAAATGAAAAAATTACCAC	Gut_R1001	GTTGATTACTAACATTAGATGTATTGAAATTAAA
Gut_R1001_SP3	GACCCAGACAAAAATGATAGCACAAATTCATA	Gut_R1001	GTTGATTACTAACATTAGATGTATTGAAATTAAA
Gut_R1001_SP4	AAGGTTTTCTAACATATTTGTAATTTTAGAACC	Gut_R1001	GTTGATTACTAACATTAGATGTATTGAAATTAAA
Gut_R1001_SP5	TAAATTATACATAAGACACCCCTAACTTAATA	Gut_R1001	GTTGATTACTAACATTAGATGTATTGAAATTAAA
Gut_R1001_SP6	AGCTGATAGGTCGTCCACCTTTAAATTTGCCCT	Gut_R1001	GTTGATTACTAACATTAGATGTATTGAAATTAAA
Gut_R1001_SP7	CTGCTTTTGGATTGAAAGCAAAAGACACAGG	Gut_R1001	GTTGATTACTAACATTAGATGTATTGAAATTAAA
Gut_R1001_SP8	AAGTTATATAATATCCCATACTTTAATACC	Gut_R1001	GTTGATTACTAACATTAGATGTATTGAAATTAAA
Gut_R1001_SP9	TTTCGCTTGCTGACCTTGCTCCTGCAAGTT	Gut_R1001	GTTGATTACTAACATTAGATGTATTGAAATTAAA
Gut_R1002_SP1	AATGGAATTGGAGTGTAAATAGAACATATC	Gut_R1002	GTTGAATAGTAACATTAGATGTATTGAAATGCAA
Gut_R1002_SP2	ACTTATTAATAGCTTCTCTATGATCTACACT	Gut_R1002	GTTGAATAGTAACATTAGATGTATTGAAATGCAA
Gut_R1002_SP3	CAAGCAAATCCTCTTCATTTGCCCAGTCCCTA	Gut_R1002	GTTGAATAGTAACATTAGATGTATTGAAATGCAA
Gut_R1003_SP1	GCATTGTAATTCGTAAATATTTTGCCGTA	Gut_R1003	TATTGTTGAATAGTAACATTAGATGTATTGAAATA
Gut_R1003_SP2	TGAGTATGAGTGTAGTTCCTACTCCTA	Gut_R1003	TATTGTTGAATAGTAACATTAGATGTATTGAAATA
Gut_R1003_SP3	CAACAATATATCCTGCATTATCGCTCGAAT	Gut_R1003	TATTGTTGAATAGTAACATTAGATGTATTGAAATA
Gut_R1003_SP4	TTAATAAGAGGCTTGATAATGACTTATGGG	Gut_R1003	TATTGTTGAATAGTAACATTAGATGTATTGAAATA
Gut_R1003_SP5	TGTGACAAAACAGTGTTATGAAGCATACAG	Gut_R1003	TATTGTTGAATAGTAACATTAGATGTATTGAAATA
Gut_R1003_SP6	GATAATGTACCTATATTCTGGTTTGGAGGT	Gut_R1003	TATTGTTGAATAGTAACATTAGATGTATTGAAATA
Gut_R1003_SP7	ATATTTTTCTTTTGTTGGTAAATGGCGGAT	Gut_R1003	TATTGTTGAATAGTAACATTAGATGTATTGAAATA
Gut_R1003_SP8	TGCTTTGGCTATAGCTTCCAACTCCGCTA	Gut_R1003	TATTGTTGAATAGTAACATTAGATGTATTGAAATA
Gut_R1003_SP9	GTACAATGACGGCATTATATTTGAATATAA	Gut_R1003	TATTGTTGAATAGTAACATTAGATGTATTGAAATA
Gut_R1004_SP1	GGATTAGTACAAATGCTCTTTCTCCTCTTCTT	Gut_R1004	AGTGTTGATTAATAACATTAGATGTATTGAAATA
Gut_R1004_SP2	ATACTGGATACCAGCTAGGCTTTATTTCATAA	Gut_R1004	AGTGTTGATTAATAACATTAGATGTATTGAAATA
Gut_R1004_SP3	GATTTATAGAACAATTTGGACTAATGAACACAGG	Gut_R1004	AGTGTTGATTAATAACATTAGATGTATTGAAATA
Gut_R1004_SP4	ACATAGAACGCTTTTTGCTTTCACTTACACTT	Gut_R1004	AGTGTTGATTAATAACATTAGATGTATTGAAATA
Gut_R1004_SP5	TATAAGATTTATTTGCTGCTAATTCGTTAAGA	Gut_R1004	AGTGTTGATTAATAACATTAGATGTATTGAAATA
Gut_R1004_SP6	ATGGTAGTAGATTCTTTTGTAGGTTTATGGAA	Gut_R1004	AGTGTTGATTAATAACATTAGATGTATTGAAATA
Gut_R1005_SP1	AACAGACGTTGCAAGACAGTGGTGTTAT	Gut_R1005	AAGGTTCTCGTCCCCTCCACGGGGTTCTCTTATCTCAATAT
Gut_R1005_SP2	GCAACTTAAAAAACAATAAAACAACTTATTGAC	Gut_R1005	AAGGTTCTCGTCCCCTCCACGGGGTTCTCTTATCTCAATAT
Gut_R1005_SP3	GCTTCGACGTGAGAATCTCCGATCATTCCCCGAC	Gut_R1005	AAGGTTCTCGTCCCCTCCACGGGGTTCTCTTATCTCAATAT
Gut_R1005_SP4	CACCAAGCGAAATTGAAAAAGCGAAAAAGTAC	Gut_R1005	AAGGTTCTCGTCCCCTCCACGGGGTTCTCTTATCTCAATAT
Gut_R1005_SP5	CAAATGAAAAAATTCAACATAATTTTAATGT	Gut_R1005	AAGGTTCTCGTCCCCTCCACGGGGTTCTCTTATCTCAATAT
Gut_R1005_SP6	TATGAAAGGAGATGAATGACATTGGAGGCAT	Gut_R1005	AAGGTTCTCGTCCCCTCCACGGGGTTCTCTTATCTCAATAT
Gut_R1005_SP7	GACTGGAAAAGTCAATCAGAAAACAAGACATGAAA	Gut_R1005	AAGGTTCTCGTCCCCTCCACGGGGTTCTCTTATCTCAATAT
Gut_R1006_SP1	TTGTACAGGATAAGGCACAGCCTATGAAAATGAATGAC	Gut_R1006	AGGTTCTCGTCCCCTCCACGGGGTTCTTATATCTCAAT
Gut_R1006_SP2	GAAAACTTCTACAAAGCTTACAAACTCGATGTAAC	Gut_R1006	AGGTTCTCGTCCCCTCCACGGGGTTCTTATATCTCAAT
Gut_R1006_SP3	CAGCTTCGACGTGAGAATCTCCGATCATTCCCCGACG	Gut_R1006	AGGTTCTCGTCCCCTCCACGGGGTTCTTATATCTCAAT
Gut_R1007_SP1	ACGCACATTGATAAATAAATAGCGTTGGCTACTCAC	Gut_R1007	AGTTCTCGTCCCCTTCTCGGGGTTCTTATATCTCTACTA
Gut_R1007_SP2	GAAATGTGGAACCGTCAACCAGAGCGTTGGAAAT	Gut_R1007	AGTTCTCGTCCCCTTCTCGGGGTTCTTATATCTCTACTA
Gut_R1007_SP3	GATTTTTGGGAACTGACAAACTACTTGAACG	Gut_R1007	AGTTCTCGTCCCCTTCTCGGGGTTCTTATATCTCTACTA
Gut_R1007_SP4	CAGTCTGCCATTCGTGACAAAATACACGGATA	Gut_R1007	AGTTCTCGTCCCCTTCTCGGGGTTCTTATATCTCTACTA
Gut_R1007_SP5	AATAAAACCGTGATAAGCCGTAGAGGTGCGTC	Gut_R1007	AGTTCTCGTCCCCTTCTCGGGGTTCTTATATCTCTACTA
Gut_R1008_SP1	TGTAAATAAGAAATACATAAAAAGAAAGGTA	Gut_R1008	AAAGGTTCTCGTCCCCTTCCCGGGGTTCTTATATCTCTAC
Gut_R1008_SP10	GAAAGGTAGATCTATTATAGCATAGATCA	Gut_R1008	AAAGGTTCTCGTCCCCTTCCCGGGGTTCTTATATCTCTAC
Gut_R1008_SP11	AACGCACAGAAAGAGCAGAAGCAAGCAGAAT	Gut_R1008	AAAGGTTCTCGTCCCCTTCCCGGGGTTCTTATATCTCTAC
Gut_R1008_SP12	CATTCGCCAGCAGTTAATAGACATGAAGAA	Gut_R1008	AAAGGTTCTCGTCCCCTTCCCGGGGTTCTTATATCTCTAC
Gut_R1008_SP13	ATGATATGGTAGGTGATTCGTTCGGGTGCT	Gut_R1008	AAAGGTTCTCGTCCCCTTCCCGGGGTTCTTATATCTCTAC
Gut_R1008_SP14	TATGGTATCAAGTGTTTCTTATTTCGATTTTAT	Gut_R1008	AAAGGTTCTCGTCCCCTTCCCGGGGTTCTTATATCTCTAC
Gut_R1008_SP15	CAGATTTTTGGGAACTGACAAACTACTTGA	Gut_R1008	AAAGGTTCTCGTCCCCTTCCCGGGGTTCTTATATCTCTAC
Gut_R1008_SP16	GAACATATTAGAACGATGCGAGTTGATAGA	Gut_R1008	AAAGGTTCTCGTCCCCTTCCCGGGGTTCTTATATCTCTAC
Gut_R1008_SP17	AGGTAGTTGATATGATGAATGCAACGGTAAAAG	Gut_R1008	AAAGGTTCTCGTCCCCTTCCCGGGGTTCTTATATCTCTAC
Gut_R1008_SP18	ATTGCTAACGCTAAACAAAACAATTCATGGA	Gut_R1008	AAAGGTTCTCGTCCCCTTCCCGGGGTTCTTATATCTCTAC
Gut_R1008_SP2	GGGGAAAATTAGTAGGTATCCGCTTAAGTCCT	Gut_R1008	AAAGGTTCTCGTCCCCTTCCCGGGGTTCTTATATCTCTAC
Gut_R1008_SP3	GATTGATATGATAAAGATGAAAAACGGAAAGG	Gut_R1008	AAAGGTTCTCGTCCCCTTCCCGGGGTTCTTATATCTCTAC
Gut_R1008_SP4	TTAATATGGAGAAGTTAAAAAACGGAAAGGAAT	Gut_R1008	AAAGGTTCTCGTCCCCTTCCCGGGGTTCTTATATCTCTAC
Gut_R1008_SP5	GAAAACGATATTACGAAAAAGGTCAACTGTA	Gut_R1008	AAAGGTTCTCGTCCCCTTCCCGGGGTTCTTATATCTCTAC
Gut_R1008_SP6	ATGTTAGTCGAATTGTTACGGATTGCGGTAT	Gut_R1008	AAAGGTTCTCGTCCCCTTCCCGGGGTTCTTATATCTCTAC
Gut_R1008_SP7	TCGCATGGGAACGGTGCGATATGCAATGCCAGC	Gut_R1008	AAAGGTTCTCGTCCCCTTCCCGGGGTTCTTATATCTCTAC
Gut_R1008_SP8	GCCGTTATTGCAGCTAGTGGGGATAGTAGACT	Gut_R1008	AAAGGTTCTCGTCCCCTTCCCGGGGTTCTTATATCTCTAC
Gut_R1008_SP9	ATTATCATGTTAAAATTTAGAAAAAGCGACA	Gut_R1008	AAAGGTTCTCGTCCCCTTCCCGGGGTTCTTATATCTCTAC
Gut_R1009_SP1	GCCGGGAGTGCCAGAAAGCGGCTTCTGATATTCAG	Gut_R1009	ATTTCAATCCACGCCCTCCTCACGGAGGGCGAC
Gut_R1009_SP10	TCATAGCGGTATCGTCGGCGCACCCGTCGAAATC	Gut_R1009	ATTTCAATCCACGCCCTCCTCACGGAGGGCGAC
Gut_R1009_SP11	AGGAGGAAATAAAATGAACGAATTAAGTGTACA	Gut_R1009	ATTTCAATCCACGCCCTCCTCACGGAGGGCGAC
Gut_R1009_SP12	ATCGGATACCGTGTTGATCGACGATGCTCTTGTC	Gut_R1009	ATTTCAATCCACGCCCTCCTCACGGAGGGCGAC
Gut_R1009_SP13	TTTTAAAACGCAGATTGCTTGTAAAAATTATTTT	Gut_R1009	ATTTCAATCCACGCCCTCCTCACGGAGGGCGAC
Gut_R1009_SP14	TTTGTGGCCGGTCTCATTGACTGGCCTGGCGAG	Gut_R1009	ATTTCAATCCACGCCCTCCTCACGGAGGGCGAC
Gut_R1009_SP15	CGCAAACGTCACCATTCCCAGCAAACCGTCTGT	Gut_R1009	ATTTCAATCCACGCCCTCCTCACGGAGGGCGAC
Gut_R1009_SP16	CAGGCCCCCAAAAAAGCCAAAAAAATAAAAGCG	Gut_R1009	ATTTCAATCCACGCCCTCCTCACGGAGGGCGAC
Gut_R1009_SP17	TGATCCCCAAAGCCCTAGAAGCCGGCCTCTCCAT	Gut_R1009	ATTTCAATCCACGCCCTCCTCACGGAGGGCGAC
Gut_R1009_SP18	CCCCGCAGAGGATTTGACCCGTGGAAAATTTGAT	Gut_R1009	ATTTCAATCCACGCCCTCCTCACGGAGGGCGAC
Gut_R1009_SP19	CTGTTGGAGGCGACCGCTACTATGGCATCTGTTGCA	Gut_R1009	ATTTCAATCCACGCCCTCCTCACGGAGGGCGAC
Gut_R1009_SP2	AGCGTGCAGTCGGAATCGACGCTGCGGACGTAA	Gut_R1009	ATTTCAATCCACGCCCTCCTCACGGAGGGCGAC
Gut_R1009_SP20	GGCTATTTTCATCGGTAAAATGACGATCATAAGTA	Gut_R1009	ATTTCAATCCACGCCCTCCTCACGGAGGGCGAC
Gut_R1009_SP21	GTATACATGATGTGCTTTAGTACTTTACTGTGAT	Gut_R1009	ATTTCAATCCACGCCCTCCTCACGGAGGGCGAC
Gut_R1009_SP22	TAATCAGGACAAACTGTATAATCTAATCAATCCG	Gut_R1009	ATTTCAATCCACGCCCTCCTCACGGAGGGCGAC
Gut_R1009_SP23	GTGGACCCTGTGGGCCGACAGGCCCAACTTCCCCCT	Gut_R1009	ATTTCAATCCACGCCCTCCTCACGGAGGGCGAC
Gut_R1009_SP24	AGCTTTGGATCGGGCGAAAGCACAGTATGGTTCC	Gut_R1009	ATTTCAATCCACGCCCTCCTCACGGAGGGCGAC
Gut_R1009_SP25	TAAGATCGCGGTTAATTCCTTGTTCCCAATCAA	Gut_R1009	ATTTCAATCCACGCCCTCCTCACGGAGGGCGAC
Gut_R1009_SP26	GTATCTGGCAGAATGTAATACCGGGACATTGGAT	Gut_R1009	ATTTCAATCCACGCCCTCCTCACGGAGGGCGAC
Gut_R1009_SP27	AAGTGACCGACTCGTTGATGGCCAAGTCATTGAGA	Gut_R1009	ATTTCAATCCACGCCCTCCTCACGGAGGGCGAC
Gut_R1009_SP28	GATGGTGCATTTTATCCCTTTTAACTCCAATTCCC	Gut_R1009	ATTTCAATCCACGCCCTCCTCACGGAGGGCGAC
Gut_R1009_SP29	GCTTCCGATTTTCAAATCTGAAAGATTCGCATTT	Gut_R1009	ATTTCAATCCACGCCCTCCTCACGGAGGGCGAC
Gut_R1009_SP3	AGATGTGGGGTAAATGATTGAGAGGTAAGCAAGAT	Gut_R1009	ATTTCAATCCACGCCCTCCTCACGGAGGGCGAC
Gut_R1009_SP30	GCCGGAGCTCAAAAGTACATATCCAGCCCGGACTTT	Gut_R1009	ATTTCAATCCACGCCCTCCTCACGGAGGGCGAC
Gut_R1009_SP31	GCCTTAATGCGCCGGCAGAAAAACCTGCGGGGGGAT	Gut_R1009	ATTTCAATCCACGCCCTCCTCACGGAGGGCGAC
Gut_R1009_SP32	TGGTTATGATATTATCAACCGGGAATACCAGGT	Gut_R1009	ATTTCAATCCACGCCCTCCTCACGGAGGGCGAC
Gut_R1009_SP33	AAATTGTAGCGGATTCGGTCCCGGTAGGCATCCCG	Gut_R1009	ATTTCAATCCACGCCCTCCTCACGGAGGGCGAC
Gut_R1009_SP34	GGTCGTCGTACCACTCCCAGGCCAAAATGCTGCGGA	Gut_R1009	ATTTCAATCCACGCCCTCCTCACGGAGGGCGAC
Gut_R1009_SP35	GGGGGCTGGATTGAGAGCGAGAAAAACCTTTCGCAG	Gut_R1009	ATTTCAATCCACGCCCTCCTCACGGAGGGCGAC
Gut_R1009_SP36	AACCGGCGTCCTCCACTACTACTGGGACAGCGGG	Gut_R1009	ATTTCAATCCACGCCCTCCTCACGGAGGGCGAC
Gut_R1009_SP37	CTTAGGCGCCGGCAGGGGTCAGCACGGCGAACGG	Gut_R1009	ATTTCAATCCACGCCCTCCTCACGGAGGGCGAC
Gut_R1009_SP38	TTGGTGCGTATGAGCAGCTTGGCACGGCCGAGAA	Gut_R1009	ATTTCAATCCACGCCCTCCTCACGGAGGGCGAC
Gut_R1009_SP39	GCTCTGCCGGACGGACGGCCAGCGCCACTATTTT	Gut_R1009	ATTTCAATCCACGCCCTCCTCACGGAGGGCGAC
Gut_R1009_SP4	GGTTCTGCACCATCTGGGGGATGGAGACCGACT	Gut_R1009	ATTTCAATCCACGCCCTCCTCACGGAGGGCGAC
Gut_R1009_SP40	GGAGTATGTGCCGGACGGCGAGACGGAGGAGTAAA	Gut_R1009	ATTTCAATCCACGCCCTCCTCACGGAGGGCGAC
Gut_R1009_SP41	CAGTAAACACCAAATCGTCCCACTGTCCTTATT	Gut_R1009	ATTTCAATCCACGCCCTCCTCACGGAGGGCGAC
Gut_R1009_SP42	TCAGTTTGATGACCTTCTTCATTTCAACAAACCA	Gut_R1009	ATTTCAATCCACGCCCTCCTCACGGAGGGCGAC
Gut_R1009_SP43	CAGTGTGAGTTTATCGGTGTATATTTAAATTCAAG	Gut_R1009	ATTTCAATCCACGCCCTCCTCACGGAGGGCGAC
Gut_R1009_SP44	CGCGATCCAGACCCCAAGGTTTGCCGACCTTCTC	Gut_R1009	ATTTCAATCCACGCCCTCCTCACGGAGGGCGAC
Gut_R1009_SP45	ATTGCTCCAGCTCTTCAACGCCGCGCGCGGAAA	Gut_R1009	ATTTCAATCCACGCCCTCCTCACGGAGGGCGAC
Gut_R1009_SP46	TTTTTCTGCCGGCGCATTAAGGCGATGGCCTCGGT	Gut_R1009	ATTTCAATCCACGCCCTCCTCACGGAGGGCGAC
Gut_R1009_SP47	CCGTTGCACCCTGCTGGTCATCTGAGTAGGTGGAA	Gut_R1009	ATTTCAATCCACGCCCTCCTCACGGAGGGCGAC
Gut_R1009_SP48	GGCCCTGCACCACGCCGATATGCAGGCGACACAG	Gut_R1009	ATTTCAATCCACGCCCTCCTCACGGAGGGCGAC
Gut_R1009_SP49	TTTGCGAATGGAGGGAAAGCCCGTGGGTTTTGTGA	Gut_R1009	ATTTCAATCCACGCCCTCCTCACGGAGGGCGAC
Gut_R1009_SP5	CGCCGTCCGGATCGGTTACGGTGTACTTGTAAGA	Gut_R1009	ATTTCAATCCACGCCCTCCTCACGGAGGGCGAC
Gut_R1009_SP50	GATGTTCACCTTCTTATCTATCCCATCCTGCCAGC	Gut_R1009	ATTTCAATCCACGCCCTCCTCACGGAGGGCGAC
Gut_R1009_SP51	GACATGTGGATGTGGAGGATAAGAATACCGTCGT	Gut_R1009	ATTTCAATCCACGCCCTCCTCACGGAGGGCGAC
Gut_R1009_SP52	GGCGGCGGGCAGGGCTTCCCGCCGGGGTGGAACGA	Gut_R1009	ATTTCAATCCACGCCCTCCTCACGGAGGGCGAC
Gut_R1009_SP53	TTTCGCCATCTGCACGCGGTCTTTACACCTTTCA	Gut_R1009	ATTTCAATCCACGCCCTCCTCACGGAGGGCGAC
Gut_R1009_SP54	CCGGGTGACCCTGTACCCCCAAAAAATCATCCAA	Gut_R1009	ATTTCAATCCACGCCCTCCTCACGGAGGGCGAC
Gut_R1009_SP55	CGATGGGGTGCTTACCCTGGGCGGCAGCTATGAC	Gut_R1009	ATTTCAATCCACGCCCTCCTCACGGAGGGCGAC
Gut_R1009_SP56	TTATGCCCTCATAGATCAACTGAAACAACTGTTG	Gut_R1009	ATTTCAATCCACGCCCTCCTCACGGAGGGCGAC
Gut_R1009_SP57	GAACAACGTTCGCACAAGTAGCCCTTTGATTGCAA	Gut_R1009	ATTTCAATCCACGCCCTCCTCACGGAGGGCGAC
Gut_R1009_SP58	CGGTCCAAGGCGGCCACCAGATCATAGTCCAGGTT	Gut_R1009	ATTTCAATCCACGCCCTCCTCACGGAGGGCGAC
Gut_R1009_SP59	ATGGTAATGATGGCTGCTGCTGAAGCAATATTTG	Gut_R1009	ATTTCAATCCACGCCCTCCTCACGGAGGGCGAC
Gut_R1009_SP6	CTGCAGCCCGAGCATTGTTGTTTTCCCCAGAGCGG	Gut_R1009	ATTTCAATCCACGCCCTCCTCACGGAGGGCGAC
Gut_R1009_SP60	AAGTTCGCCCTCGTCCAAATCTTCACCAAATCTT	Gut_R1009	ATTTCAATCCACGCCCTCCTCACGGAGGGCGAC
Gut_R1009_SP61	GCCAGGAAGACATTGGGGTCATGCAGGTCTCCA	Gut_R1009	ATTTCAATCCACGCCCTCCTCACGGAGGGCGAC
Gut_R1009_SP62	GGGCCCTGGCAGATGTCCTCCACCGGGCCAAGGG	Gut_R1009	ATTTCAATCCACGCCCTCCTCACGGAGGGCGAC
Gut_R1009_SP63	CGGGCCCTGGCAGATGTCCTCCACCGGGCCAAGGG	Gut_R1009	ATTTCAATCCACGCCCTCCTCACGGAGGGCGAC
Gut_R1009_SP64	TGGCTGCGGCCAGGATTGCCGCCATCTGGGAGAG	Gut_R1009	ATTTCAATCCACGCCCTCCTCACGGAGGGCGAC
Gut_R1009_SP65	GGTACACACCTTTAAGACGCGTGTGATCTGATTTT	Gut_R1009	ATTTCAATCCACGCCCTCCTCACGGAGGGCGAC
Gut_R1009_SP66	TTTGCCCCGCGTGCAACCGGAAGGCAAAGATCGG	Gut_R1009	ATTTCAATCCACGCCCTCCTCACGGAGGGCGAC
Gut_R1009_SP67	GAGGGAGCACAGACAATGGACGAGTTCAACAAGAG	Gut_R1009	ATTTCAATCCACGCCCTCCTCACGGAGGGCGAC
Gut_R1009_SP68	CTAAACCAGGTCTTTGGCATGTCCAGCACCGAGAT	Gut_R1009	ATTTCAATCCACGCCCTCCTCACGGAGGGCGAC
Gut_R1009_SP69	CCCCCGGGCCTTGGCCCGCTGGAATTCCCCTTC	Gut_R1009	ATTTCAATCCACGCCCTCCTCACGGAGGGCGAC
Gut_R1009_SP7	GGCCATATCCACCCGGATGACCAAGATGGGCATAA	Gut_R1009	ATTTCAATCCACGCCCTCCTCACGGAGGGCGAC
Gut_R1009_SP70	CCACCGCCTTCTGGGCCTGTTTCTGCGCATCCAG	Gut_R1009	ATTTCAATCCACGCCCTCCTCACGGAGGGCGAC
Gut_R1009_SP71	TTTAGGCATTGTTTTGTGGTAAAATAATAATGG	Gut_R1009	ATTTCAATCCACGCCCTCCTCACGGAGGGCGAC
Gut_R1009_SP8	TACTCCTCCCGGGCGGTGCTGTCCTGGATGGCAAA	Gut_R1009	ATTTCAATCCACGCCCTCCTCACGGAGGGCGAC
Gut_R1009_SP9	GAATTGAAATCGGTACGCGCTTCGTATCCGACTTT	Gut_R1009	ATTTCAATCCACGCCCTCCTCACGGAGGGCGAC
Gut_R101_SP1	GAGCATGAGCATCATCATGACCATGACCACGGGGAGCATGAG	Gut_R101	CATCATCACGACCATGACCACGAG
Gut_R101_SP2	GAGCATGAACATCATCACGACCATGACCACGAGGAGCATGAAC	Gut_R101	CATCATCACGACCATGACCACGAG
Gut_R101_SP3	GAGCATGAACATCATCACGACCATGACCACGAGGAGCATGAA	Gut_R101	CATCATCACGACCATGACCACGAG
Gut_R1010_SP1	CTTAGGCGCCGGCAGGGGTCAGCACGGCGAACGG	Gut_R1010	ATTTCAATCCACGCCCTCCTCACGGAGGGTGAC
Gut_R1010_SP10	ACCCTGCTTCTGAATGAGGGAGCAGAGGACGGC	Gut_R1010	ATTTCAATCCACGCCCTCCTCACGGAGGGTGAC
Gut_R1010_SP11	GCGGCACAGGGCCAGCTCCTGGAGCCGCTTGGCGGT	Gut_R1010	ATTTCAATCCACGCCCTCCTCACGGAGGGTGAC
Gut_R1010_SP12	ATGGGACCTCTTTTGCCATCGACACCCTCATCGA	Gut_R1010	ATTTCAATCCACGCCCTCCTCACGGAGGGTGAC
Gut_R1010_SP13	CATCAACAAGATGTACCAGAAGGGCCTCTCCAA	Gut_R1010	ATTTCAATCCACGCCCTCCTCACGGAGGGTGAC
Gut_R1010_SP14	TACCCGACCCTTGACGGACGGCAAGCCAGAGCG	Gut_R1010	ATTTCAATCCACGCCCTCCTCACGGAGGGTGAC
Gut_R1010_SP15	TTGCGGCTTCCTGTTCCTTTGCAATTACAAACCAAT	Gut_R1010	ATTTCAATCCACGCCCTCCTCACGGAGGGTGAC
Gut_R1010_SP16	CTGGGCAGATCGTGGGACTGAGCAAGCGGCATCTG	Gut_R1010	ATTTCAATCCACGCCCTCCTCACGGAGGGTGAC
Gut_R1010_SP17	TTGGTGCGTATGAGCAGCTTGGCACGGCCGAGAA	Gut_R1010	ATTTCAATCCACGCCCTCCTCACGGAGGGTGAC
Gut_R1010_SP18	AGACGGTTTTAACCGGCGCTATACTTGCTATGAAG	Gut_R1010	ATTTCAATCCACGCCCTCCTCACGGAGGGTGAC
Gut_R1010_SP19	GAGTGCCACTACATTAAACCCGACAACCGCAACCA	Gut_R1010	ATTTCAATCCACGCCCTCCTCACGGAGGGTGAC
Gut_R1010_SP2	CCGCTGCTCCGGCGATCCCAGCACCTTGCTGACAC	Gut_R1010	ATTTCAATCCACGCCCTCCTCACGGAGGGTGAC
Gut_R1010_SP20	TTTGTGGCCGGTCTCATTGACTGGCCTGGCGAG	Gut_R1010	ATTTCAATCCACGCCCTCCTCACGGAGGGTGAC
Gut_R1010_SP21	AGATGTGGGGTAAATGATTGAGAGGTAAGCAAGAT	Gut_R1010	ATTTCAATCCACGCCCTCCTCACGGAGGGTGAC
Gut_R1010_SP3	TATGGCAAGCCGAGAATGGATAGAGAAGCAGACG	Gut_R1010	ATTTCAATCCACGCCCTCCTCACGGAGGGTGAC
Gut_R1010_SP4	CGATGGTGATGGCGCGGTTGTCGTTCTCACGGCTG	Gut_R1010	ATTTCAATCCACGCCCTCCTCACGGAGGGTGAC
Gut_R1010_SP5	TGGGCTAAAATGTGGACGCAAGCTGTAACCAATGAA	Gut_R1010	ATTTCAATCCACGCCCTCCTCACGGAGGGTGAC
Gut_R1010_SP6	GTTGGCTGTAGTATTCTGGGCAAGAACACCGCTCC	Gut_R1010	ATTTCAATCCACGCCCTCCTCACGGAGGGTGAC
Gut_R1010_SP7	TCATCTGGTACGGCCTCAACTGGTCCTTTGAGCT	Gut_R1010	ATTTCAATCCACGCCCTCCTCACGGAGGGTGAC
Gut_R1010_SP8	AGTTTACGCCCTCGCGCTCGTTTTCGTATCCCCC	Gut_R1010	ATTTCAATCCACGCCCTCCTCACGGAGGGTGAC
Gut_R1010_SP9	ATGCCCTGCCCTGCGGTCTGCTGTAAGGTAAGT	Gut_R1010	ATTTCAATCCACGCCCTCCTCACGGAGGGTGAC
Gut_R1011_SP1	GGCAACTCTTCGGCTGGTCTATGATAATAG	Gut_R1011	ATGAAATTTTAATTCACAACCGCTACGCGGCTGAACACG
Gut_R1011_SP2	CGTTCGTGGTGACGGTGAAATTTCCAGAC	Gut_R1011	ATGAAATTTTAATTCACAACCGCTACGCGGCTGAACACG
Gut_R1011_SP3	TCGTTCCAAACTTCGTAATAGTTGCGGCGG	Gut_R1011	ATGAAATTTTAATTCACAACCGCTACGCGGCTGAACACG
Gut_R1012_SP1	CATCTGGTATCTAACTGGAAGGATGACGATGTT	Gut_R1012	GTGTTCAGCCGCGTAGCGGTTGTGAATTAAAATA
Gut_R1012_SP2	TCATGTCTGGAAATTTCACCGTCACCACGAACGC	Gut_R1012	GTGTTCAGCCGCGTAGCGGTTGTGAATTAAAATA
Gut_R1012_SP3	TCCTAAATGGCGCAATCGGAATCAATGACTTTGT	Gut_R1012	GTGTTCAGCCGCGTAGCGGTTGTGAATTAAAATA
Gut_R1012_SP4	ATCAGGTGCGCGGGTATGGCAGAGTCAGCGAAA	Gut_R1012	GTGTTCAGCCGCGTAGCGGTTGTGAATTAAAATA
Gut_R1013_SP1	TTTTTCCTGGATTAAATTTTCCATCTGTTCC	Gut_R1013	ATTTCAATCCACGAGGCTCTTACAAGCCTCGACGA
Gut_R1013_SP2	GTAGTTCAGCGTTTTTATTCAAACGATGATAC	Gut_R1013	ATTTCAATCCACGAGGCTCTTACAAGCCTCGACGA
Gut_R1013_SP3	AGTAGTGACGTCCACTCTCGCAGAACAGATT	Gut_R1013	ATTTCAATCCACGAGGCTCTTACAAGCCTCGACGA
Gut_R1014_SP1	GACATAAAAATGATATATTATTTTCTGTTACGGAGAA	Gut_R1014	GTTTCAATACCGCGAGCGGTAGGTGTTGTTGCAACA
Gut_R1014_SP2	TATGACAAAAGAACATGTCCTGTTAAGATATTTAAATGCT	Gut_R1014	GTTTCAATACCGCGAGCGGTAGGTGTTGTTGCAACA
Gut_R1014_SP3	GATAGGTTCTTCTGTAGGAGCCTCTAGTGTTTCTAAA	Gut_R1014	GTTTCAATACCGCGAGCGGTAGGTGTTGTTGCAACA
Gut_R1015_SP1	GACAGCACTATGTCCGTATTAAAAGAGTATCCAGGTGCT	Gut_R1015	CGTTGCAACAACACCTACCGCTCGCGGTATTGAAAC
Gut_R1015_SP2	AGTAACTTGGTAGTTTTTAATAAGCTCGGATAGTCATT	Gut_R1015	CGTTGCAACAACACCTACCGCTCGCGGTATTGAAAC
Gut_R1015_SP3	CGATTCAAGAGCGTGTGGAAAGTATTATTGAATCATTA	Gut_R1015	CGTTGCAACAACACCTACCGCTCGCGGTATTGAAAC
Gut_R1015_SP4	TACATAACCAAGCATGAAGAAAAATGCTCTGAACAA	Gut_R1015	CGTTGCAACAACACCTACCGCTCGCGGTATTGAAAC
Gut_R1015_SP5	CAATTTTCGCAGTTATTTCTTTTTTTGCTACTTGTG	Gut_R1015	CGTTGCAACAACACCTACCGCTCGCGGTATTGAAAC
Gut_R1015_SP6	TCAGGATATTTTTTGGCAATTTGTAATGCTAATC	Gut_R1015	CGTTGCAACAACACCTACCGCTCGCGGTATTGAAAC
Gut_R1016_SP1	GAGCTCCTAAAGTAGTTGAATTTGGTCATCATGTATT	Gut_R1016	AAGTTTCAATACCGCGAGCGGTAGGTGTTGTTGCAACTTA
Gut_R1016_SP2	TTAGCATTACAAATTGCCAAAAAATATCCT	Gut_R1016	AAGTTTCAATACCGCGAGCGGTAGGTGTTGTTGCAACTTA
Gut_R1016_SP3	AACATACGACCATAAAAAAAGAAGTTGAA	Gut_R1016	AAGTTTCAATACCGCGAGCGGTAGGTGTTGTTGCAACTTA
Gut_R1016_SP4	CACAAGAGAAAGGTTATAAGTTCTTCTTGCTTCC	Gut_R1016	AAGTTTCAATACCGCGAGCGGTAGGTGTTGTTGCAACTTA
Gut_R1017_SP1	AGACCGAGACGGCAACAAAGGACATT	Gut_R1017	GAGTTTGAGAGTCGTGTTGTTTTAGATGGTAGTCAAACC
Gut_R1017_SP2	TGTTCGGTGGCCGGGGATATGCGGCAG	Gut_R1017	GAGTTTGAGAGTCGTGTTGTTTTAGATGGTAGTCAAACC
Gut_R1017_SP3	CTATGGCGTGATTATCGATTCTAACGT	Gut_R1017	GAGTTTGAGAGTCGTGTTGTTTTAGATGGTAGTCAAACC
Gut_R1017_SP4	TGAATCTTCAGGCGCCAGCATATATTC	Gut_R1017	GAGTTTGAGAGTCGTGTTGTTTTAGATGGTAGTCAAACC
Gut_R1017_SP5	GAAAACAAGTCTGCGCCCAAACACCGA	Gut_R1017	GAGTTTGAGAGTCGTGTTGTTTTAGATGGTAGTCAAACC
Gut_R1018_SP1	TCAAGAACGGCCTGGCAAACGGCGAGGACT	Gut_R1018	GTTTGACTACCATCTAAAACAACACAGCTCTCAAAC
Gut_R1018_SP2	ATGCTTATGTTTGATTCTGTAAAAACGGTA	Gut_R1018	GTTTGACTACCATCTAAAACAACACAGCTCTCAAAC
Gut_R1018_SP3	CCTTGTCAAAGGTGCTAAACAACAAAAGTT	Gut_R1018	GTTTGACTACCATCTAAAACAACACAGCTCTCAAAC
Gut_R1018_SP4	ACATTGGCCGAACGCATGTTCGCTAAACCG	Gut_R1018	GTTTGACTACCATCTAAAACAACACAGCTCTCAAAC
Gut_R1019_SP1	TCAAGAACGGCCTGGCAAACGGCGAGGACT	Gut_R1019	GTTTGACTACCATCTAAAACAACACGGCTCTCAAAC
Gut_R1019_SP2	AGAATTGATGTACACCTGGGTAGTGTCAAC	Gut_R1019	GTTTGACTACCATCTAAAACAACACGGCTCTCAAAC
Gut_R1019_SP3	GTGCTGTCCTGTACTTCGCAATGAACGTCA	Gut_R1019	GTTTGACTACCATCTAAAACAACACGGCTCTCAAAC
Gut_R1019_SP4	GCTAACAATGCCCTAAATATTGCTAATTCA	Gut_R1019	GTTTGACTACCATCTAAAACAACACGGCTCTCAAAC
Gut_R102_SP1	CACTCACAAATAACCACGCTGTCAAACACTTGGC	Gut_R102	ATTTCAATCCACGCAAGCGTGTAGCTTGCGAC
Gut_R102_SP10	CCGAAGGGTGGTGCGCATAATGCCTAGTTTTAGCCG	Gut_R102	ATTTCAATCCACGCAAGCGTGTAGCTTGCGAC
Gut_R102_SP11	GCGTCTGAGCGACACGGATCTCACCGATGTTGTATTC	Gut_R102	ATTTCAATCCACGCAAGCGTGTAGCTTGCGAC
Gut_R102_SP12	CCTTGGAATTGACGCTCAGATCAAGGATTTTGAA	Gut_R102	ATTTCAATCCACGCAAGCGTGTAGCTTGCGAC
Gut_R102_SP13	GAACCTGCGCGATATCTATGACCAGATCGCAAGT	Gut_R102	ATTTCAATCCACGCAAGCGTGTAGCTTGCGAC
Gut_R102_SP14	GATCGCAATGGGTGCACTTAAATCGGGTGTTCCG	Gut_R102	ATTTCAATCCACGCAAGCGTGTAGCTTGCGAC
Gut_R102_SP15	TCATCGTCAAAGGCGTATGCAAACAATAATATTT	Gut_R102	ATTTCAATCCACGCAAGCGTGTAGCTTGCGAC
Gut_R102_SP16	GATTTTCTAATTCTGGATAAACGCGTTGACCAAG	Gut_R102	ATTTCAATCCACGCAAGCGTGTAGCTTGCGAC
Gut_R102_SP17	CCCTCAATTAACATAATCAATCCCCCCTGCGGCC	Gut_R102	ATTTCAATCCACGCAAGCGTGTAGCTTGCGAC
Gut_R102_SP2	AATATCCACTTCTTGGTTATAAAACACTAAGAGC	Gut_R102	ATTTCAATCCACGCAAGCGTGTAGCTTGCGAC
Gut_R102_SP3	TCTGGCCGGCTTACCACGCCAATGAACACATTGG	Gut_R102	ATTTCAATCCACGCAAGCGTGTAGCTTGCGAC
Gut_R102_SP4	TCTATCAAGGAGCGAACCATTAGTGTGAATAAA	Gut_R102	ATTTCAATCCACGCAAGCGTGTAGCTTGCGAC
Gut_R102_SP5	GCTTCATTAAGGGATGGCCCCGAAGGACTAGAAGT	Gut_R102	ATTTCAATCCACGCAAGCGTGTAGCTTGCGAC
Gut_R102_SP6	GGATTTGATCCACAAGACTTTTTTACGATCATCAA	Gut_R102	ATTTCAATCCACGCAAGCGTGTAGCTTGCGAC
Gut_R102_SP7	TAGGCCATCCGGTAGGTGTCCTCCTGCTTGCTGAT	Gut_R102	ATTTCAATCCACGCAAGCGTGTAGCTTGCGAC
Gut_R102_SP8	ATATCGTGGATAATAATGTCACTGATATTAACTG	Gut_R102	ATTTCAATCCACGCAAGCGTGTAGCTTGCGAC
Gut_R102_SP9	GGTAACGCGAGCAGCCTCCCGGCCGGAGTTGTAT	Gut_R102	ATTTCAATCCACGCAAGCGTGTAGCTTGCGAC
Gut_R1020_SP1	TTGGACGATATTTCCGGGATTTACGACCACCAGG	Gut_R1020	ATTTAGATCCACAGGCCCCTGCGAGCCTGACC
Gut_R1020_SP2	GGCAGTGGGAATAGGAATATTAACAACCTATATA	Gut_R1020	ATTTAGATCCACAGGCCCCTGCGAGCCTGACC
Gut_R1020_SP3	CCTTGCGTGTGTGGCAAATACATCAATTACACTG	Gut_R1020	ATTTAGATCCACAGGCCCCTGCGAGCCTGACC
Gut_R1021_SP1	TTGTTCACTGCCCCAAAGCCCATAACTATAACAC	Gut_R1021	AGTCAGGCTCGCAGGAGCCTGTGGATCTAAAT
Gut_R1021_SP2	AATAAGACTCACAGTCTAAACGCCAAGCGTTCT	Gut_R1021	AGTCAGGCTCGCAGGAGCCTGTGGATCTAAAT
Gut_R1021_SP3	ATTCATGCTGTATTTATTATGTTCGGTGATTAC	Gut_R1021	AGTCAGGCTCGCAGGAGCCTGTGGATCTAAAT
Gut_R1022_SP1	ACTGGCAATAAAGTTGCTTCTCCCTGGTT	Gut_R1022	GTTGTATCTTATCGAAATTCTACATCAAACCACAAC
Gut_R1022_SP10	CTTTACCGCAACCGTACACAAAGAGTACG	Gut_R1022	GTTGTATCTTATCGAAATTCTACATCAAACCACAAC
Gut_R1022_SP100	TAGCCCGCCTTTTTATAGAGGGTGTGGCT	Gut_R1022	GTTGTATCTTATCGAAATTCTACATCAAACCACAAC
Gut_R1022_SP101	TTCGTCTCGAGCGAGAGTTAGCCCATTGT	Gut_R1022	GTTGTATCTTATCGAAATTCTACATCAAACCACAAC
Gut_R1022_SP102	CCTCCACAGGCTCCGGTACGCGAACGCCCG	Gut_R1022	GTTGTATCTTATCGAAATTCTACATCAAACCACAAC
Gut_R1022_SP103	GAACAACGATCCGGAACCGAACAACGATCC	Gut_R1022	GTTGTATCTTATCGAAATTCTACATCAAACCACAAC
Gut_R1022_SP104	TTCCGTTTAACCCGTAAATACTCTTTTTTA	Gut_R1022	GTTGTATCTTATCGAAATTCTACATCAAACCACAAC
Gut_R1022_SP105	CTCTTCGGTACCAACTGCATGTACAATCA	Gut_R1022	GTTGTATCTTATCGAAATTCTACATCAAACCACAAC
Gut_R1022_SP106	ACAATCAATTACTAACAGATGTGGGTATAC	Gut_R1022	GTTGTATCTTATCGAAATTCTACATCAAACCACAAC
Gut_R1022_SP107	TCTACAAGAACTACTACGCAAACAAGCAG	Gut_R1022	GTTGTATCTTATCGAAATTCTACATCAAACCACAAC
Gut_R1022_SP108	CTCGAAGTAGCTTTCCAGATTTCGAATGT	Gut_R1022	GTTGTATCTTATCGAAATTCTACATCAAACCACAAC
Gut_R1022_SP109	TGCGGCCTATCCGCATTTTGCGGTCGATTT	Gut_R1022	GTTGTATCTTATCGAAATTCTACATCAAACCACAAC
Gut_R1022_SP11	CGCGAGTTTGACACCTCAAAATTTACAGAG	Gut_R1022	GTTGTATCTTATCGAAATTCTACATCAAACCACAAC
Gut_R1022_SP110	CATAAAGGTCTTCAGCGTGAAACGGTGTAC	Gut_R1022	GTTGTATCTTATCGAAATTCTACATCAAACCACAAC
Gut_R1022_SP111	CATAAAGGTCTTCAGCGTGAAACGGGGTAC	Gut_R1022	GTTGTATCTTATCGAAATTCTACATCAAACCACAAC
Gut_R1022_SP112	TATCCTCGCGCTGCCGTTAAGGACGGCCGA	Gut_R1022	GTTGTATCTTATCGAAATTCTACATCAAACCACAAC
Gut_R1022_SP113	GTTTGGAGACGCGCTCAAAAGTGCAGGGAA	Gut_R1022	GTTGTATCTTATCGAAATTCTACATCAAACCACAAC
Gut_R1022_SP114	CGCAACCCGTCAACATCTATCTACGCTAAC	Gut_R1022	GTTGTATCTTATCGAAATTCTACATCAAACCACAAC
Gut_R1022_SP115	ACCTTACTTACGTATTTTACGCAGTATCCT	Gut_R1022	GTTGTATCTTATCGAAATTCTACATCAAACCACAAC
Gut_R1022_SP116	ATTATGCTATATAATTGTGTGCGTATCCT	Gut_R1022	GTTGTATCTTATCGAAATTCTACATCAAACCACAAC
Gut_R1022_SP117	TCCTCTTAACTCGTAAATACTTTTTTTAT	Gut_R1022	GTTGTATCTTATCGAAATTCTACATCAAACCACAAC
Gut_R1022_SP118	TTCCAGCGAAGCGATAACACACTTACCAG	Gut_R1022	GTTGTATCTTATCGAAATTCTACATCAAACCACAAC
Gut_R1022_SP119	TTCGTTGGCAGCGTCCTGATTTTTGTTGT	Gut_R1022	GTTGTATCTTATCGAAATTCTACATCAAACCACAAC
Gut_R1022_SP12	GGGCGGCTGCTTCTCTTTCGGTTCCTTCG	Gut_R1022	GTTGTATCTTATCGAAATTCTACATCAAACCACAAC
Gut_R1022_SP120	TCGGCCCGCCCTGCCTCTGCTCCTCCTGT	Gut_R1022	GTTGTATCTTATCGAAATTCTACATCAAACCACAAC
Gut_R1022_SP121	TCGGCCCCTGCCGGAACATATCACGTTCTAC	Gut_R1022	GTTGTATCTTATCGAAATTCTACATCAAACCACAAC
Gut_R1022_SP122	CGGGCTCGATCTTCCATGTGATGAGATTG	Gut_R1022	GTTGTATCTTATCGAAATTCTACATCAAACCACAAC
Gut_R1022_SP123	CACGCAGCAGATCACCGCTACGACTTCCGG	Gut_R1022	GTTGTATCTTATCGAAATTCTACATCAAACCACAAC
Gut_R1022_SP124	ACCCCTGCTGCCGTACTTGGCTCTTCCGG	Gut_R1022	GTTGTATCTTATCGAAATTCTACATCAAACCACAAC
Gut_R1022_SP125	CCTCTACCAGCGGGCGCAAGTTACGACAAA	Gut_R1022	GTTGTATCTTATCGAAATTCTACATCAAACCACAAC
Gut_R1022_SP126	GTACCCGATGCATATATTACTGCCGTTGAA	Gut_R1022	GTTGTATCTTATCGAAATTCTACATCAAACCACAAC
Gut_R1022_SP127	ATTTCGATTTTAAGAAGCGTATCAATTATA	Gut_R1022	GTTGTATCTTATCGAAATTCTACATCAAACCACAAC
Gut_R1022_SP128	AGAGGGCGAACGTTATGCGGAATTTGCGA	Gut_R1022	GTTGTATCTTATCGAAATTCTACATCAAACCACAAC
Gut_R1022_SP129	CCATCACGCCTGACTATCTTTCTTATAGGG	Gut_R1022	GTTGTATCTTATCGAAATTCTACATCAAACCACAAC
Gut_R1022_SP13	TGGCTATTCGATGATTGCGCGGAGTTCCT	Gut_R1022	GTTGTATCTTATCGAAATTCTACATCAAACCACAAC
Gut_R1022_SP130	TAACAGGCCGCACGTTAAACGGTTTCGACG	Gut_R1022	GTTGTATCTTATCGAAATTCTACATCAAACCACAAC
Gut_R1022_SP131	TGGCAGTCTTCGATTAATCCGTCTAATGT	Gut_R1022	GTTGTATCTTATCGAAATTCTACATCAAACCACAAC
Gut_R1022_SP132	AGTTCAATACTACGACTACTCGTTCCCTA	Gut_R1022	GTTGTATCTTATCGAAATTCTACATCAAACCACAAC
Gut_R1022_SP133	TGCAAATGTATACAATTTACTTTACATTCC	Gut_R1022	GTTGTATCTTATCGAAATTCTACATCAAACCACAAC
Gut_R1022_SP134	CCGCACGTGCAGCGGCTTTGAGCGTGCATA	Gut_R1022	GTTGTATCTTATCGAAATTCTACATCAAACCACAAC
Gut_R1022_SP135	GGCAGGGGAGAACATTGTCGCTTGGAATA	Gut_R1022	GTTGTATCTTATCGAAATTCTACATCAAACCACAAC
Gut_R1022_SP136	ACTCCTGCCGCCGTTTTGGGTTCCTCGGG	Gut_R1022	GTTGTATCTTATCGAAATTCTACATCAAACCACAAC
Gut_R1022_SP137	AAAACCGCACTCTTGATAGAACGCAACAAA	Gut_R1022	GTTGTATCTTATCGAAATTCTACATCAAACCACAAC
Gut_R1022_SP138	TCGAGTACGTACAATAATTCTCGTAGATC	Gut_R1022	GTTGTATCTTATCGAAATTCTACATCAAACCACAAC
Gut_R1022_SP139	GGCGGTTCTCGCTTTAGTGATTGGTTGGA	Gut_R1022	GTTGTATCTTATCGAAATTCTACATCAAACCACAAC
Gut_R1022_SP14	AATGATTTTGTTATTGTAAAATCCACTAA	Gut_R1022	GTTGTATCTTATCGAAATTCTACATCAAACCACAAC
Gut_R1022_SP140	AATGTCCTTTATAACACTATTCGGGCGGCT	Gut_R1022	GTTGTATCTTATCGAAATTCTACATCAAACCACAAC
Gut_R1022_SP141	AAACCGGAGGAACAAGCTTAACTGGCAAA	Gut_R1022	GTTGTATCTTATCGAAATTCTACATCAAACCACAAC
Gut_R1022_SP142	GCTCCTATCCTGCTATATAGACACATGCTA	Gut_R1022	GTTGTATCTTATCGAAATTCTACATCAAACCACAAC
Gut_R1022_SP143	TGTACGCCGCTTAATGCCTGCTGTAGTGCG	Gut_R1022	GTTGTATCTTATCGAAATTCTACATCAAACCACAAC
Gut_R1022_SP144	TCGCAGTGGGGTCTTTATTCTTTTGCGTG	Gut_R1022	GTTGTATCTTATCGAAATTCTACATCAAACCACAAC
Gut_R1022_SP145	ATCTGGACTGACAAGACAGATCAAGAGAT	Gut_R1022	GTTGTATCTTATCGAAATTCTACATCAAACCACAAC
Gut_R1022_SP146	AATAGATATACACGAATGTAATTAATATC	Gut_R1022	GTTGTATCTTATCGAAATTCTACATCAAACCACAAC
Gut_R1022_SP147	CGTCGCCATGTATTCAAAGCATGTTGAGG	Gut_R1022	GTTGTATCTTATCGAAATTCTACATCAAACCACAAC
Gut_R1022_SP148	TCCGTGGAGGTATGTCGCGTGCGGCCGGT	Gut_R1022	GTTGTATCTTATCGAAATTCTACATCAAACCACAAC
Gut_R1022_SP149	GCGGCGTGAAAGGATTCGCGCTTGATCTA	Gut_R1022	GTTGTATCTTATCGAAATTCTACATCAAACCACAAC
Gut_R1022_SP15	TTTTCGGAGGCATGAATGCCCGCCGCCAGT	Gut_R1022	GTTGTATCTTATCGAAATTCTACATCAAACCACAAC
Gut_R1022_SP150	AGGGCCAATTATAGGGTTAGCGGCCGAAGG	Gut_R1022	GTTGTATCTTATCGAAATTCTACATCAAACCACAAC
Gut_R1022_SP151	TCCGCCTTGAGCGCGAGTTAGCTCGCTGT	Gut_R1022	GTTGTATCTTATCGAAATTCTACATCAAACCACAAC
Gut_R1022_SP152	TGCGCCTGTGGATGCGTCCGAACAGGAGCC	Gut_R1022	GTTGTATCTTATCGAAATTCTACATCAAACCACAAC
Gut_R1022_SP153	TCCATTGGATTCGTGTATATATTATTTAC	Gut_R1022	GTTGTATCTTATCGAAATTCTACATCAAACCACAAC
Gut_R1022_SP154	CGGCGACGATTACGTGCTTATCGGATCGCA	Gut_R1022	GTTGTATCTTATCGAAATTCTACATCAAACCACAAC
Gut_R1022_SP155	CGCGTCCCGAACCATCTTTATTTGCAGGA	Gut_R1022	GTTGTATCTTATCGAAATTCTACATCAAACCACAAC
Gut_R1022_SP156	CGGGTCCCGAACCATCTTTACTTGCAGGA	Gut_R1022	GTTGTATCTTATCGAAATTCTACATCAAACCACAAC
Gut_R1022_SP157	CCTTCGTCGTCAGCGTAATGATTGGTTCG	Gut_R1022	GTTGTATCTTATCGAAATTCTACATCAAACCACAAC
Gut_R1022_SP158	ATTAAGTGGAGAACTACTACGTAGCGATAA	Gut_R1022	GTTGTATCTTATCGAAATTCTACATCAAACCACAAC
Gut_R1022_SP159	GCTCTATGGTATTCTTTTTCTCCAGGTTA	Gut_R1022	GTTGTATCTTATCGAAATTCTACATCAAACCACAAC
Gut_R1022_SP16	CGCGTAACGATCAACCCGCGTTTACGCAGC	Gut_R1022	GTTGTATCTTATCGAAATTCTACATCAAACCACAAC
Gut_R1022_SP160	ATTGTCCCGCATGCTTGATCCGTTCGGAT	Gut_R1022	GTTGTATCTTATCGAAATTCTACATCAAACCACAAC
Gut_R1022_SP161	CGGGTGCTGGTTCTCCTATTCATTTAGGA	Gut_R1022	GTTGTATCTTATCGAAATTCTACATCAAACCACAAC
Gut_R1022_SP162	CATCCATGCTTCAGTCTTTCAAAAATATT	Gut_R1022	GTTGTATCTTATCGAAATTCTACATCAAACCACAAC
Gut_R1022_SP163	TCGGAAGACTGACCGCACAATTCCGCTAC	Gut_R1022	GTTGTATCTTATCGAAATTCTACATCAAACCACAAC
Gut_R1022_SP164	ATCTGTTGAGCGCCCCCGATGAGGGGTTCA	Gut_R1022	GTTGTATCTTATCGAAATTCTACATCAAACCACAAC
Gut_R1022_SP165	AGGCCTAAAAGTAGATACGTAGACCCGGG	Gut_R1022	GTTGTATCTTATCGAAATTCTACATCAAACCACAAC
Gut_R1022_SP166	TGTTTAATGCACAAATTGAGCATCAAGAC	Gut_R1022	GTTGTATCTTATCGAAATTCTACATCAAACCACAAC
Gut_R1022_SP167	ACGCGCGCTTTGCATTCGGCACCGCGTCGA	Gut_R1022	GTTGTATCTTATCGAAATTCTACATCAAACCACAAC
Gut_R1022_SP168	CCGCCGGACATCTGACCAGCAAAAGCACCC	Gut_R1022	GTTGTATCTTATCGAAATTCTACATCAAACCACAAC
Gut_R1022_SP169	AGGAAGAGCGCGAACAGCTATGGTTGCAAA	Gut_R1022	GTTGTATCTTATCGAAATTCTACATCAAACCACAAC
Gut_R1022_SP17	GTGATAACGGTCTTCACGTCCAGCAGTTC	Gut_R1022	GTTGTATCTTATCGAAATTCTACATCAAACCACAAC
Gut_R1022_SP170	TGTGTTCCACGCCAAGACCGCAATGGACA	Gut_R1022	GTTGTATCTTATCGAAATTCTACATCAAACCACAAC
Gut_R1022_SP171	AACGCGCCGGATATTCCTTCGCGCGATGAA	Gut_R1022	GTTGTATCTTATCGAAATTCTACATCAAACCACAAC
Gut_R1022_SP172	CCGCGGCTATCGTTTGTATTAATCCTTGCC	Gut_R1022	GTTGTATCTTATCGAAATTCTACATCAAACCACAAC
Gut_R1022_SP173	CTGCTGCCTTATCTCCTTGTTGAGCGTGCG	Gut_R1022	GTTGTATCTTATCGAAATTCTACATCAAACCACAAC
Gut_R1022_SP174	TCGAAACGATGTTGAACCTGTGGCTTTTCC	Gut_R1022	GTTGTATCTTATCGAAATTCTACATCAAACCACAAC
Gut_R1022_SP175	GGGCGCAACCTATACCAGCCAGTGCGGTGT	Gut_R1022	GTTGTATCTTATCGAAATTCTACATCAAACCACAAC
Gut_R1022_SP176	CAATCGCCGATGATCATCGTGGTGCAACGC	Gut_R1022	GTTGTATCTTATCGAAATTCTACATCAAACCACAAC
Gut_R1022_SP177	TGCAGAAGGGGTACGTCGTTCAGGAGTTT	Gut_R1022	GTTGTATCTTATCGAAATTCTACATCAAACCACAAC
Gut_R1022_SP178	CAAATGGCGTCATCTCGCACCAAGAGGCAAT	Gut_R1022	GTTGTATCTTATCGAAATTCTACATCAAACCACAAC
Gut_R1022_SP179	TTCTTTGTGCCTACTGCGTAGAATCCGTCT	Gut_R1022	GTTGTATCTTATCGAAATTCTACATCAAACCACAAC
Gut_R1022_SP18	AACAGAGATCGCTTAATACGTTCGCCTTGT	Gut_R1022	GTTGTATCTTATCGAAATTCTACATCAAACCACAAC
Gut_R1022_SP180	TACCGTGATACGTTCAATTTCGTGCACTCG	Gut_R1022	GTTGTATCTTATCGAAATTCTACATCAAACCACAAC
Gut_R1022_SP181	CAAGCGGAGTAAAACCTTTTGCTGCACTCG	Gut_R1022	GTTGTATCTTATCGAAATTCTACATCAAACCACAAC
Gut_R1022_SP182	TATGTGGCTACCGTCCATGTCGAGGGCATCA	Gut_R1022	GTTGTATCTTATCGAAATTCTACATCAAACCACAAC
Gut_R1022_SP183	ATATGTCCGGGAGGCTGAGACTCTCAGAC	Gut_R1022	GTTGTATCTTATCGAAATTCTACATCAAACCACAAC
Gut_R1022_SP184	AAGGCGAAACTCCCCAAATATCGGCCGACG	Gut_R1022	GTTGTATCTTATCGAAATTCTACATCAAACCACAAC
Gut_R1022_SP185	CCTGGGTGCGCTGTATCTACCTTGCTTACG	Gut_R1022	GTTGTATCTTATCGAAATTCTACATCAAACCACAAC
Gut_R1022_SP186	GTCAGGGGGTTCATTGACGGACTGAACAAG	Gut_R1022	GTTGTATCTTATCGAAATTCTACATCAAACCACAAC
Gut_R1022_SP187	TATGACAGATGAGACAAGACAATCATGTT	Gut_R1022	GTTGTATCTTATCGAAATTCTACATCAAACCACAAC
Gut_R1022_SP188	ATCTCGTTCGGCTGTTTCCTCGCTAATAC	Gut_R1022	GTTGTATCTTATCGAAATTCTACATCAAACCACAAC
Gut_R1022_SP189	AGGATCGAAATCGATGTCGGGGTTGAACTT	Gut_R1022	GTTGTATCTTATCGAAATTCTACATCAAACCACAAC
Gut_R1022_SP19	GTTCTCGTAAACGCAGTTTCCCCTGTTTTG	Gut_R1022	GTTGTATCTTATCGAAATTCTACATCAAACCACAAC
Gut_R1022_SP190	CTTCCATCGCCACGGTCCACGAAGGCATG	Gut_R1022	GTTGTATCTTATCGAAATTCTACATCAAACCACAAC
Gut_R1022_SP191	TCTGACCAAGCTGTCCGATAGTGGCCTGATA	Gut_R1022	GTTGTATCTTATCGAAATTCTACATCAAACCACAAC
Gut_R1022_SP192	TGTGTCTTCGAACTCTTTTCGCAGCCTGTC	Gut_R1022	GTTGTATCTTATCGAAATTCTACATCAAACCACAAC
Gut_R1022_SP193	AGCAGCGCTCTCTCGGTTTTTCGTATGTGG	Gut_R1022	GTTGTATCTTATCGAAATTCTACATCAAACCACAAC
Gut_R1022_SP194	CAAGGGGCTAGATGTTTCGTTCCCAAAGT	Gut_R1022	GTTGTATCTTATCGAAATTCTACATCAAACCACAAC
Gut_R1022_SP195	TTTGCTGCTGGAGGTGTTAGCCCTATTTA	Gut_R1022	GTTGTATCTTATCGAAATTCTACATCAAACCACAAC
Gut_R1022_SP196	TACGCCTGTACAAGTAATTATCAAACATGC	Gut_R1022	GTTGTATCTTATCGAAATTCTACATCAAACCACAAC
Gut_R1022_SP197	AAATTCGAAACAACAAGAATGCCCCTCTCT	Gut_R1022	GTTGTATCTTATCGAAATTCTACATCAAACCACAAC
Gut_R1022_SP198	CAGGAACTGCTAACGGAGGAAATGGCAGC	Gut_R1022	GTTGTATCTTATCGAAATTCTACATCAAACCACAAC
Gut_R1022_SP199	ATGTCGATTGAGGTACAGTACATCCGTCAA	Gut_R1022	GTTGTATCTTATCGAAATTCTACATCAAACCACAAC
Gut_R1022_SP2	TACAGGCCGGACTTCCCGAAGGTTGGGCGC	Gut_R1022	GTTGTATCTTATCGAAATTCTACATCAAACCACAAC
Gut_R1022_SP20	TATTGATTTTAGGCCTAGTTTTTCCCCTA	Gut_R1022	GTTGTATCTTATCGAAATTCTACATCAAACCACAAC
Gut_R1022_SP200	CTTGAAAGGTGGTGAAGTCAATAGATTGGA	Gut_R1022	GTTGTATCTTATCGAAATTCTACATCAAACCACAAC
Gut_R1022_SP201	AATAAACGCATGTCTTTGCGTTCAGTTTCA	Gut_R1022	GTTGTATCTTATCGAAATTCTACATCAAACCACAAC
Gut_R1022_SP202	AATGACGATGAGACAGCAACGGCACGTCAT	Gut_R1022	GTTGTATCTTATCGAAATTCTACATCAAACCACAAC
Gut_R1022_SP203	CTGCCACAATGGAAGGCGGCTCGGCTATTG	Gut_R1022	GTTGTATCTTATCGAAATTCTACATCAAACCACAAC
Gut_R1022_SP204	CTCGGCCAGCTTTTCGGTGGCATGAACGCC	Gut_R1022	GTTGTATCTTATCGAAATTCTACATCAAACCACAAC
Gut_R1022_SP205	TCTGGTGGATCTTTAGACTTTTCTAGTCCT	Gut_R1022	GTTGTATCTTATCGAAATTCTACATCAAACCACAAC
Gut_R1022_SP206	TACGTACTTCTCAACCATTTCGGAGGCTGT	Gut_R1022	GTTGTATCTTATCGAAATTCTACATCAAACCACAAC
Gut_R1022_SP207	TTGGTTGGCAGCGTCCGAATTTTTGTTGTT	Gut_R1022	GTTGTATCTTATCGAAATTCTACATCAAACCACAAC
Gut_R1022_SP208	AGACCAGGATTCTCGAGCAGCGGCATTAGA	Gut_R1022	GTTGTATCTTATCGAAATTCTACATCAAACCACAAC
Gut_R1022_SP209	GTTTATCCGCAACATCCTGCTTGCACAGG	Gut_R1022	GTTGTATCTTATCGAAATTCTACATCAAACCACAAC
Gut_R1022_SP21	CGATCTTCGCTTGTGGACGAAAATTCAGAA	Gut_R1022	GTTGTATCTTATCGAAATTCTACATCAAACCACAAC
Gut_R1022_SP210	TGGCCGTACATCCAAACCTCCAACAGCGCA	Gut_R1022	GTTGTATCTTATCGAAATTCTACATCAAACCACAAC
Gut_R1022_SP211	CCATCCTCGCCAATGTTGCGGCGGCCAATG	Gut_R1022	GTTGTATCTTATCGAAATTCTACATCAAACCACAAC
Gut_R1022_SP212	GCAGGCGCTTCGTATGTTGGTCGCAAGGC	Gut_R1022	GTTGTATCTTATCGAAATTCTACATCAAACCACAAC
Gut_R1022_SP213	CTCAAGGACTGCCAATTTGAACCCCTTCCT	Gut_R1022	GTTGTATCTTATCGAAATTCTACATCAAACCACAAC
Gut_R1022_SP214	ATTTATCGCAGATGATTGGCCCATCCTCA	Gut_R1022	GTTGTATCTTATCGAAATTCTACATCAAACCACAAC
Gut_R1022_SP215	GGATTCGGAATCCGACACGTACGCAGGCCG	Gut_R1022	GTTGTATCTTATCGAAATTCTACATCAAACCACAAC
Gut_R1022_SP216	CGTATCCGGCTCCGCTTTTCCGAGCGCATC	Gut_R1022	GTTGTATCTTATCGAAATTCTACATCAAACCACAAC
Gut_R1022_SP217	GCAAAGGGCGCGCTAAAGGACATGCGCATC	Gut_R1022	GTTGTATCTTATCGAAATTCTACATCAAACCACAAC
Gut_R1022_SP218	CCTAATTTCAGTATCGAGTTTTTCGACAA	Gut_R1022	GTTGTATCTTATCGAAATTCTACATCAAACCACAAC
Gut_R1022_SP219	AGTTAAATTGGGAAAAGGAAGTCCCTGTTC	Gut_R1022	GTTGTATCTTATCGAAATTCTACATCAAACCACAAC
Gut_R1022_SP22	TTGTTATGATTTATAAGTTTTACAAAGCTA	Gut_R1022	GTTGTATCTTATCGAAATTCTACATCAAACCACAAC
Gut_R1022_SP220	AACTCAAGACAATGGACGACCTGCATAAA	Gut_R1022	GTTGTATCTTATCGAAATTCTACATCAAACCACAAC
Gut_R1022_SP221	CCGACAAAAGAGCTGCCGAAGATTATCTT	Gut_R1022	GTTGTATCTTATCGAAATTCTACATCAAACCACAAC
Gut_R1022_SP222	TCGGGTACCACCACTCCCAATTCCGCTCTT	Gut_R1022	GTTGTATCTTATCGAAATTCTACATCAAACCACAAC
Gut_R1022_SP223	AGCTGACCCAAAACCTCATCATAAGAAGA	Gut_R1022	GTTGTATCTTATCGAAATTCTACATCAAACCACAAC
Gut_R1022_SP224	TAGACCGCGAAGTGGAGCCATGGAGCTCG	Gut_R1022	GTTGTATCTTATCGAAATTCTACATCAAACCACAAC
Gut_R1022_SP225	TTCCGCCACTTTATCCGCACCGCCCCCGAT	Gut_R1022	GTTGTATCTTATCGAAATTCTACATCAAACCACAAC
Gut_R1022_SP226	TATCGTCTGCGTAATGAAGCGCAGACGGC	Gut_R1022	GTTGTATCTTATCGAAATTCTACATCAAACCACAAC
Gut_R1022_SP227	CCGTCAGGGCGAGGCCCGCAAACGGAATTG	Gut_R1022	GTTGTATCTTATCGAAATTCTACATCAAACCACAAC
Gut_R1022_SP228	TGCGTTCCCTGCACTTTTGAGCGCGTCTCC	Gut_R1022	GTTGTATCTTATCGAAATTCTACATCAAACCACAAC
Gut_R1022_SP229	GCTGCAGGTACTTTATTGAAACTTATTAA	Gut_R1022	GTTGTATCTTATCGAAATTCTACATCAAACCACAAC
Gut_R1022_SP23	GCGAGCCGTTAGGCGTATATTCTACAACCG	Gut_R1022	GTTGTATCTTATCGAAATTCTACATCAAACCACAAC
Gut_R1022_SP230	TTCCGAACGGCGACTTCTATCGATAATAA	Gut_R1022	GTTGTATCTTATCGAAATTCTACATCAAACCACAAC
Gut_R1022_SP231	TGGTCGGCCAGAGACTTCGCACGCGCGGCC	Gut_R1022	GTTGTATCTTATCGAAATTCTACATCAAACCACAAC
Gut_R1022_SP232	AGTGAAGCCGGATGAAGTGAATGATAGTTT	Gut_R1022	GTTGTATCTTATCGAAATTCTACATCAAACCACAAC
Gut_R1022_SP233	AGGTTTTTTGAAAGCTCTTTCCGGTATAGG	Gut_R1022	GTTGTATCTTATCGAAATTCTACATCAAACCACAAC
Gut_R1022_SP234	TGTAACCCCGTCAATCTCCTGCGGCACGAT	Gut_R1022	GTTGTATCTTATCGAAATTCTACATCAAACCACAAC
Gut_R1022_SP235	CGTGCCCTGACGCCATCGAAGACAAGGCTC	Gut_R1022	GTTGTATCTTATCGAAATTCTACATCAAACCACAAC
Gut_R1022_SP236	ACTGGGTAGTTGATTCTGCTTTACCCTAT	Gut_R1022	GTTGTATCTTATCGAAATTCTACATCAAACCACAAC
Gut_R1022_SP237	GTTACCCACGTTCCGGTAAAACCTTTGCGT	Gut_R1022	GTTGTATCTTATCGAAATTCTACATCAAACCACAAC
Gut_R1022_SP238	CGGTTGATCGCAATACTGCTGCCGCTAATC	Gut_R1022	GTTGTATCTTATCGAAATTCTACATCAAACCACAAC
Gut_R1022_SP239	CTATGGACGACAAAGAGTGCCTCAGAAATC	Gut_R1022	GTTGTATCTTATCGAAATTCTACATCAAACCACAAC
Gut_R1022_SP24	TATACGCACAAGAGCAAGAAAATACAAATG	Gut_R1022	GTTGTATCTTATCGAAATTCTACATCAAACCACAAC
Gut_R1022_SP240	CCGCTCGGTTCTCGCGAGTTGAGCGAGGC	Gut_R1022	GTTGTATCTTATCGAAATTCTACATCAAACCACAAC
Gut_R1022_SP241	AATGCTCAATTCCTCACATGGAACCAGTCC	Gut_R1022	GTTGTATCTTATCGAAATTCTACATCAAACCACAAC
Gut_R1022_SP242	AACGCCCGCCGTCAGTGGCGTTATCAGCAG	Gut_R1022	GTTGTATCTTATCGAAATTCTACATCAAACCACAAC
Gut_R1022_SP243	ACCGCTTTCGGCACTGTTTTTAACGGCGT	Gut_R1022	GTTGTATCTTATCGAAATTCTACATCAAACCACAAC
Gut_R1022_SP244	GGTGATGATGACCTCACGCCCAACGGTGAC	Gut_R1022	GTTGTATCTTATCGAAATTCTACATCAAACCACAAC
Gut_R1022_SP245	AATTCCGCATGACCATGTTAGCATACAAG	Gut_R1022	GTTGTATCTTATCGAAATTCTACATCAAACCACAAC
Gut_R1022_SP246	GTTGACCCATCTGTTACCCCGCTTGAATT	Gut_R1022	GTTGTATCTTATCGAAATTCTACATCAAACCACAAC
Gut_R1022_SP247	ATCAGCCATTGACGAGCGACATCCCAAGG	Gut_R1022	GTTGTATCTTATCGAAATTCTACATCAAACCACAAC
Gut_R1022_SP248	CTCGTTGTTGACCATGAAATAAAGTCCGGT	Gut_R1022	GTTGTATCTTATCGAAATTCTACATCAAACCACAAC
Gut_R1022_SP249	CTTGAACTCTGATCTACCGTCAGCCAATAC	Gut_R1022	GTTGTATCTTATCGAAATTCTACATCAAACCACAAC
Gut_R1022_SP25	TCTTTATTAGCAAACATTCTATCTAAATT	Gut_R1022	GTTGTATCTTATCGAAATTCTACATCAAACCACAAC
Gut_R1022_SP250	ATCGGGCGGGCACAGGTGATTTCGTCCCGC	Gut_R1022	GTTGTATCTTATCGAAATTCTACATCAAACCACAAC
Gut_R1022_SP251	ACCCTTCGAAGGTTTTTGCCCGCTATCAGA	Gut_R1022	GTTGTATCTTATCGAAATTCTACATCAAACCACAAC
Gut_R1022_SP252	GGATATTCTCCAGTTTTGGAGAGATCATTA	Gut_R1022	GTTGTATCTTATCGAAATTCTACATCAAACCACAAC
Gut_R1022_SP253	TCGCGTGCGGCCGGCACAATTTCTGCCGGT	Gut_R1022	GTTGTATCTTATCGAAATTCTACATCAAACCACAAC
Gut_R1022_SP254	TCAAGCACGTACAATAATTCTCGTAGATCT	Gut_R1022	GTTGTATCTTATCGAAATTCTACATCAAACCACAAC
Gut_R1022_SP255	GGAGGTTCGCGCTATAGTGATTGGTTGGAG	Gut_R1022	GTTGTATCTTATCGAAATTCTACATCAAACCACAAC
Gut_R1022_SP256	CAATGCCATTCAATTCCGGGTTAAAATCA	Gut_R1022	GTTGTATCTTATCGAAATTCTACATCAAACCACAAC
Gut_R1022_SP257	CCCCTTTACTCTTACTGGATTCAACAGCG	Gut_R1022	GTTGTATCTTATCGAAATTCTACATCAAACCACAAC
Gut_R1022_SP258	TAAAAGCCGCCAGCTGTTTCCGTATTTTCT	Gut_R1022	GTTGTATCTTATCGAAATTCTACATCAAACCACAAC
Gut_R1022_SP259	AACGAGTGCGACACCCTTTCCGCCGTCACG	Gut_R1022	GTTGTATCTTATCGAAATTCTACATCAAACCACAAC
Gut_R1022_SP26	CCCGGCGTTGGCCTGACTCCTACTGTAAC	Gut_R1022	GTTGTATCTTATCGAAATTCTACATCAAACCACAAC
Gut_R1022_SP260	TAATGAGCGTGACGCTCGTATTGCTGAACT	Gut_R1022	GTTGTATCTTATCGAAATTCTACATCAAACCACAAC
Gut_R1022_SP261	AACTTAACTGGGAAAAAGAAGTCCCGGTTC	Gut_R1022	GTTGTATCTTATCGAAATTCTACATCAAACCACAAC
Gut_R1022_SP262	AATCTCTCACCTTTCTCAAAATCAGAAGG	Gut_R1022	GTTGTATCTTATCGAAATTCTACATCAAACCACAAC
Gut_R1022_SP263	TGAGAGCGTCGAGTGGATGAAGGAGCTGGA	Gut_R1022	GTTGTATCTTATCGAAATTCTACATCAAACCACAAC
Gut_R1022_SP264	TACATTGTAGTATCCTTTTTCGGGGAATAT	Gut_R1022	GTTGTATCTTATCGAAATTCTACATCAAACCACAAC
Gut_R1022_SP265	CCTGGGACTGACACGTTTTTTACCCAACG	Gut_R1022	GTTGTATCTTATCGAAATTCTACATCAAACCACAAC
Gut_R1022_SP266	TTTCTGTGCTTTTGTGTTTCGCTGAATGT	Gut_R1022	GTTGTATCTTATCGAAATTCTACATCAAACCACAAC
Gut_R1022_SP267	TTCCCGTAGGTGCTTCGTCCGCTGTTTCTA	Gut_R1022	GTTGTATCTTATCGAAATTCTACATCAAACCACAAC
Gut_R1022_SP268	TTCCCGTTGCACTTCTACGCTACGTAGTT	Gut_R1022	GTTGTATCTTATCGAAATTCTACATCAAACCACAAC
Gut_R1022_SP269	CACAGTTGGCAACGTCCGTACAATGCTTGA	Gut_R1022	GTTGTATCTTATCGAAATTCTACATCAAACCACAAC
Gut_R1022_SP27	CCTGTCTTCGTATCCTTCCCCTTCAATCGG	Gut_R1022	GTTGTATCTTATCGAAATTCTACATCAAACCACAAC
Gut_R1022_SP270	AGCGTGTTAGACATAAGATCGGCCACTCCT	Gut_R1022	GTTGTATCTTATCGAAATTCTACATCAAACCACAAC
Gut_R1022_SP271	AACGACGTTAAGCGCGATAGCGAGGCTTAT	Gut_R1022	GTTGTATCTTATCGAAATTCTACATCAAACCACAAC
Gut_R1022_SP272	CAAGGTGGTGCTATTGCTTTTAATGAGCGA	Gut_R1022	GTTGTATCTTATCGAAATTCTACATCAAACCACAAC
Gut_R1022_SP273	CTTCCCAGTACGCCGAAGTTAATGCCATTG	Gut_R1022	GTTGTATCTTATCGAAATTCTACATCAAACCACAAC
Gut_R1022_SP274	TACGAGGTCGAAGTATCGATTGACCGTAAA	Gut_R1022	GTTGTATCTTATCGAAATTCTACATCAAACCACAAC
Gut_R1022_SP275	AGCATTCCCAAGACCTCGTCGTATGAAGA	Gut_R1022	GTTGTATCTTATCGAAATTCTACATCAAACCACAAC
Gut_R1022_SP276	AAACGAAGCAGCCACAACATCGGACAATTA	Gut_R1022	GTTGTATCTTATCGAAATTCTACATCAAACCACAAC
Gut_R1022_SP277	ACACTGCAAATGTATACAATTTACTTTAT	Gut_R1022	GTTGTATCTTATCGAAATTCTACATCAAACCACAAC
Gut_R1022_SP278	CCCTTCGATGTATCTGTCCGGGAGAGTCT	Gut_R1022	GTTGTATCTTATCGAAATTCTACATCAAACCACAAC
Gut_R1022_SP279	GCAGCGTCGCGATACATCGATCGTAAACGC	Gut_R1022	GTTGTATCTTATCGAAATTCTACATCAAACCACAAC
Gut_R1022_SP28	TGCGAGGACTGTCTCCGTCGTCAACGCAAT	Gut_R1022	GTTGTATCTTATCGAAATTCTACATCAAACCACAAC
Gut_R1022_SP280	AATTGTCTGTACAATGAAATTCGATCGGCT	Gut_R1022	GTTGTATCTTATCGAAATTCTACATCAAACCACAAC
Gut_R1022_SP281	TTGTACGAAATGTTTAGTTTGTAGGTTGTA	Gut_R1022	GTTGTATCTTATCGAAATTCTACATCAAACCACAAC
Gut_R1022_SP282	TCATCGGCTGGATGGAGAACACCTGCCGG	Gut_R1022	GTTGTATCTTATCGAAATTCTACATCAAACCACAAC
Gut_R1022_SP283	TGTTCGTCATGTATTCGATCCACGACGGT	Gut_R1022	GTTGTATCTTATCGAAATTCTACATCAAACCACAAC
Gut_R1022_SP284	ACTGGCTTGATTACTGGTGCTTTAGGCCAA	Gut_R1022	GTTGTATCTTATCGAAATTCTACATCAAACCACAAC
Gut_R1022_SP285	TTCTACGCCGTTGGAGAACGAAAGGAAGGG	Gut_R1022	GTTGTATCTTATCGAAATTCTACATCAAACCACAAC
Gut_R1022_SP29	GAAGCCTACAAAGCCATGTTGCGTACTTT	Gut_R1022	GTTGTATCTTATCGAAATTCTACATCAAACCACAAC
Gut_R1022_SP3	TTGTCAGTTGTGATGAGTGTGCTGCCTGTT	Gut_R1022	GTTGTATCTTATCGAAATTCTACATCAAACCACAAC
Gut_R1022_SP30	TGCGTAACTCTCGACTTCGCCTCGCTCATG	Gut_R1022	GTTGTATCTTATCGAAATTCTACATCAAACCACAAC
Gut_R1022_SP31	TCCCACGCCTTGTAAGCCGTGGCCTTCGCC	Gut_R1022	GTTGTATCTTATCGAAATTCTACATCAAACCACAAC
Gut_R1022_SP32	ACCTTATACGTTACGCCCGTTTTTTCGCT	Gut_R1022	GTTGTATCTTATCGAAATTCTACATCAAACCACAAC
Gut_R1022_SP33	AGCGAATTCGCCATAAGCTCGGACACTCAT	Gut_R1022	GTTGTATCTTATCGAAATTCTACATCAAACCACAAC
Gut_R1022_SP34	TCTTGCTTGTGTATTAGCGAGGAAACAGCC	Gut_R1022	GTTGTATCTTATCGAAATTCTACATCAAACCACAAC
Gut_R1022_SP35	ATATGGACGGATAAAACAGATCAGGAAATA	Gut_R1022	GTTGTATCTTATCGAAATTCTACATCAAACCACAAC
Gut_R1022_SP36	TATTCAGGATGGTCGTTTTGTTCAACTTCC	Gut_R1022	GTTGTATCTTATCGAAATTCTACATCAAACCACAAC
Gut_R1022_SP37	AGACCTCCGGAACAGGAACATTGACGGTAA	Gut_R1022	GTTGTATCTTATCGAAATTCTACATCAAACCACAAC
Gut_R1022_SP38	CGCCAATGGAATAGCGATAACAAACGCAGT	Gut_R1022	GTTGTATCTTATCGAAATTCTACATCAAACCACAAC
Gut_R1022_SP39	TCTATTCGGGAAAAGCCGTGAAAGCCTACT	Gut_R1022	GTTGTATCTTATCGAAATTCTACATCAAACCACAAC
Gut_R1022_SP4	TCGATTACTTACAAGTTTAACGATCCTGGC	Gut_R1022	GTTGTATCTTATCGAAATTCTACATCAAACCACAAC
Gut_R1022_SP40	ACTGTTGGCAGCGTCCTTACAATGCTTGAT	Gut_R1022	GTTGTATCTTATCGAAATTCTACATCAAACCACAAC
Gut_R1022_SP41	AACAACTTCTCCGACTCGAGCGGTAACGGT	Gut_R1022	GTTGTATCTTATCGAAATTCTACATCAAACCACAAC
Gut_R1022_SP42	TTTCCGCTTGATCTATCCGGTCTATACTGT	Gut_R1022	GTTGTATCTTATCGAAATTCTACATCAAACCACAAC
Gut_R1022_SP43	TATCCCCGCAATATATGTCTCGGGATAGGT	Gut_R1022	GTTGTATCTTATCGAAATTCTACATCAAACCACAAC
Gut_R1022_SP44	TGTATACGACATCGGTAAAAGCCGCTGGCA	Gut_R1022	GTTGTATCTTATCGAAATTCTACATCAAACCACAAC
Gut_R1022_SP45	TGATGATCTTACTGGTATTATTTCTAATG	Gut_R1022	GTTGTATCTTATCGAAATTCTACATCAAACCACAAC
Gut_R1022_SP46	AATACGGGAAGCGCTTTGCGCGCGGTGTGG	Gut_R1022	GTTGTATCTTATCGAAATTCTACATCAAACCACAAC
Gut_R1022_SP47	TTATCCGTACCTTATTCGCCCGACTTGTT	Gut_R1022	GTTGTATCTTATCGAAATTCTACATCAAACCACAAC
Gut_R1022_SP48	AGCGAATTCGCCATAAGCTCGGACACTCA	Gut_R1022	GTTGTATCTTATCGAAATTCTACATCAAACCACAAC
Gut_R1022_SP49	ATCGACAGGCTCAAAGCCTGTTATTTCGT	Gut_R1022	GTTGTATCTTATCGAAATTCTACATCAAACCACAAC
Gut_R1022_SP5	TTCTCCTATATCATCGATATAACGAAAGT	Gut_R1022	GTTGTATCTTATCGAAATTCTACATCAAACCACAAC
Gut_R1022_SP50	AGCGGATTCGTCATAAAATCGGCCACTCCT	Gut_R1022	GTTGTATCTTATCGAAATTCTACATCAAACCACAAC
Gut_R1022_SP51	AGCGCATTCGCCATAAAATCGGCCACTCCT	Gut_R1022	GTTGTATCTTATCGAAATTCTACATCAAACCACAAC
Gut_R1022_SP52	AGCGAGTGCGCCATAAGATCGGCCACTCCT	Gut_R1022	GTTGTATCTTATCGAAATTCTACATCAAACCACAAC
Gut_R1022_SP53	TCCGTTAACGGCCCTCTCGGGCAGCAGGGC	Gut_R1022	GTTGTATCTTATCGAAATTCTACATCAAACCACAAC
Gut_R1022_SP54	TTGACGTCAGTCGTCTTAACTGTCACGGG	Gut_R1022	GTTGTATCTTATCGAAATTCTACATCAAACCACAAC
Gut_R1022_SP55	AATGCCCGTCGCCAGTGGAGGTTCCAGCAA	Gut_R1022	GTTGTATCTTATCGAAATTCTACATCAAACCACAAC
Gut_R1022_SP56	GCCAGCGAACGTTCGGCGTCGGCCAGCAA	Gut_R1022	GTTGTATCTTATCGAAATTCTACATCAAACCACAAC
Gut_R1022_SP57	GTGCGCGCCCGGGCGCTGGACGCAAATGT	Gut_R1022	GTTGTATCTTATCGAAATTCTACATCAAACCACAAC
Gut_R1022_SP58	TATCGACGCCGAGCGCAAACGGCTAACAT	Gut_R1022	GTTGTATCTTATCGAAATTCTACATCAAACCACAAC
Gut_R1022_SP59	CTTTGGCAAGAGTCCGTGAATTGCTAAAGG	Gut_R1022	GTTGTATCTTATCGAAATTCTACATCAAACCACAAC
Gut_R1022_SP6	AGAACGTACTCACCTCTAACCTGAGGTTCA	Gut_R1022	GTTGTATCTTATCGAAATTCTACATCAAACCACAAC
Gut_R1022_SP60	CTTTTGCGAGAGTTCGTGAATCGCTAAAGG	Gut_R1022	GTTGTATCTTATCGAAATTCTACATCAAACCACAAC
Gut_R1022_SP61	GGCTACTCCGTCCGAAGTTTTCCAGTTCCA	Gut_R1022	GTTGTATCTTATCGAAATTCTACATCAAACCACAAC
Gut_R1022_SP62	AACTTTCCTGCTTCTTACGAGGATCCGGC	Gut_R1022	GTTGTATCTTATCGAAATTCTACATCAAACCACAAC
Gut_R1022_SP63	GAGAGGCTCGGCTCCGGCAACAAAATGAA	Gut_R1022	GTTGTATCTTATCGAAATTCTACATCAAACCACAAC
Gut_R1022_SP64	CGTGCGTGCGGACGTAATGGACAACGGCGA	Gut_R1022	GTTGTATCTTATCGAAATTCTACATCAAACCACAAC
Gut_R1022_SP65	GCGCTTCCTTCCGGCTTAACCCAAGCTCAA	Gut_R1022	GTTGTATCTTATCGAAATTCTACATCAAACCACAAC
Gut_R1022_SP66	CAAAGATTTGCAAAAGTGGTATGAGCTCAA	Gut_R1022	GTTGTATCTTATCGAAATTCTACATCAAACCACAAC
Gut_R1022_SP67	CTTATGACGAGGTTTTGGGTCAGATTTCTG	Gut_R1022	GTTGTATCTTATCGAAATTCTACATCAAACCACAAC
Gut_R1022_SP68	TGGCCGAGCGTTCGGGTGTACCCGTCGAT	Gut_R1022	GTTGTATCTTATCGAAATTCTACATCAAACCACAAC
Gut_R1022_SP69	ATTTCTGCGAATGCTTCATCGCTGAATGT	Gut_R1022	GTTGTATCTTATCGAAATTCTACATCAAACCACAAC
Gut_R1022_SP7	AAAAGCAAATGATGTGTTTTGCTGCTTCTT	Gut_R1022	GTTGTATCTTATCGAAATTCTACATCAAACCACAAC
Gut_R1022_SP70	CATGTTGATACTGTTCGCGTAGATTATATT	Gut_R1022	GTTGTATCTTATCGAAATTCTACATCAAACCACAAC
Gut_R1022_SP71	GTTTTCGTAATGCGTCCTGTACGCTACTGG	Gut_R1022	GTTGTATCTTATCGAAATTCTACATCAAACCACAAC
Gut_R1022_SP72	AACGGGTTCGCCACAAACTTGGTCATTCT	Gut_R1022	GTTGTATCTTATCGAAATTCTACATCAAACCACAAC
Gut_R1022_SP73	GATGCCGACTGAATGGGAATCGTGAAATCC	Gut_R1022	GTTGTATCTTATCGAAATTCTACATCAAACCACAAC
Gut_R1022_SP74	CTTCTGCGAGAGTTCGTGAATCGCTGGAGG	Gut_R1022	GTTGTATCTTATCGAAATTCTACATCAAACCACAAC
Gut_R1022_SP75	GTCGTCAATCTTATTATTTCCGCGAGCCGG	Gut_R1022	GTTGTATCTTATCGAAATTCTACATCAAACCACAAC
Gut_R1022_SP76	GGTGTGAGTATGAGATTATTCTTCAATCA	Gut_R1022	GTTGTATCTTATCGAAATTCTACATCAAACCACAAC
Gut_R1022_SP77	GTGTTCATACCAGCTTCGAAAATGGACTA	Gut_R1022	GTTGTATCTTATCGAAATTCTACATCAAACCACAAC
Gut_R1022_SP78	CTGCGGCAAGTGCGAGGATTGCTTGCGTC	Gut_R1022	GTTGTATCTTATCGAAATTCTACATCAAACCACAAC
Gut_R1022_SP79	TGAGTAGGATGTATTCGAACCTCGTTAAG	Gut_R1022	GTTGTATCTTATCGAAATTCTACATCAAACCACAAC
Gut_R1022_SP8	AGCGTCTTCGCCACAAGATCGGACATTCGT	Gut_R1022	GTTGTATCTTATCGAAATTCTACATCAAACCACAAC
Gut_R1022_SP80	GGAACGGCACCTTGACGGCCGGTACGATA	Gut_R1022	GTTGTATCTTATCGAAATTCTACATCAAACCACAAC
Gut_R1022_SP81	AGAAGCAAATGATGCGTTTTGCTGCCTCTT	Gut_R1022	GTTGTATCTTATCGAAATTCTACATCAAACCACAAC
Gut_R1022_SP82	GATCCCAGCCGCCTTATTTCCTCCGCCTTC	Gut_R1022	GTTGTATCTTATCGAAATTCTACATCAAACCACAAC
Gut_R1022_SP83	AGCGCGTTCGACACAAAATTGGCCACTCT	Gut_R1022	GTTGTATCTTATCGAAATTCTACATCAAACCACAAC
Gut_R1022_SP84	GCTTTGGGCTTCACACCTAAATGAACTCGC	Gut_R1022	GTTGTATCTTATCGAAATTCTACATCAAACCACAAC
Gut_R1022_SP85	TTCGCTGTATACTCGGTTACACTGCTTTGG	Gut_R1022	GTTGTATCTTATCGAAATTCTACATCAAACCACAAC
Gut_R1022_SP86	GGAATCAACGCCACCATGTCTGGCGGTTCC	Gut_R1022	GTTGTATCTTATCGAAATTCTACATCAAACCACAAC
Gut_R1022_SP87	GCTCGGATGTCAATTCCGTTTCATTTGCAA	Gut_R1022	GTTGTATCTTATCGAAATTCTACATCAAACCACAAC
Gut_R1022_SP88	ATAACTCGAATCGTCGCCTTTCTTGGCAG	Gut_R1022	GTTGTATCTTATCGAAATTCTACATCAAACCACAAC
Gut_R1022_SP89	TTGGCAGTTGTGATGAGTGTGCTGCCTGTT	Gut_R1022	GTTGTATCTTATCGAAATTCTACATCAAACCACAAC
Gut_R1022_SP9	TACGCTGTGTTTTACAAGTGTTATTGTGT	Gut_R1022	GTTGTATCTTATCGAAATTCTACATCAAACCACAAC
Gut_R1022_SP90	AGCGTATTCGCCATAAAATCGGCCACTCC	Gut_R1022	GTTGTATCTTATCGAAATTCTACATCAAACCACAAC
Gut_R1022_SP91	CGTTCAGGCGTTTCCGATGAATGCCCCCCT	Gut_R1022	GTTGTATCTTATCGAAATTCTACATCAAACCACAAC
Gut_R1022_SP92	GGTGTTTCGTCTGATGCTTCTGCTCCTTCT	Gut_R1022	GTTGTATCTTATCGAAATTCTACATCAAACCACAAC
Gut_R1022_SP93	GGCTCTGTCGACATCCTTCCTGGTCGTCCC	Gut_R1022	GTTGTATCTTATCGAAATTCTACATCAAACCACAAC
Gut_R1022_SP94	TGCCACCGAAAAGGTGACGTCCCAGCAGA	Gut_R1022	GTTGTATCTTATCGAAATTCTACATCAAACCACAAC
Gut_R1022_SP95	AGTGTTTGACGTTCGTATTTCACTGCCACC	Gut_R1022	GTTGTATCTTATCGAAATTCTACATCAAACCACAAC
Gut_R1022_SP96	ACGCCTTTGCTCTTCTCCGTGTAGATCATC	Gut_R1022	GTTGTATCTTATCGAAATTCTACATCAAACCACAAC
Gut_R1022_SP97	CCGAACCGCGAAATGCGTCACCTCGCCACA	Gut_R1022	GTTGTATCTTATCGAAATTCTACATCAAACCACAAC
Gut_R1022_SP98	GGCACGATCCGCACGTTTCGATTTTCCGGA	Gut_R1022	GTTGTATCTTATCGAAATTCTACATCAAACCACAAC
Gut_R1022_SP99	CTGTGGAAAGTGCGAAGATTGCCTTCGTC	Gut_R1022	GTTGTATCTTATCGAAATTCTACATCAAACCACAAC
Gut_R1023_SP1	ATTATTGGTTAAATTTAATTTTTCCCTTGGT	Gut_R1023	GTTGCTTCATATTTTGATTCTACATCAAACCACAAC
Gut_R1023_SP10	TCAATCTCGGCAACCTTGTCAATTGCGAA	Gut_R1023	GTTGCTTCATATTTTGATTCTACATCAAACCACAAC
Gut_R1023_SP11	TGCCCTGCAGATGGTCAACGAGCAACTCC	Gut_R1023	GTTGCTTCATATTTTGATTCTACATCAAACCACAAC
Gut_R1023_SP12	AAAACCGCACTCTTGATAGAACGCAACAAA	Gut_R1023	GTTGCTTCATATTTTGATTCTACATCAAACCACAAC
Gut_R1023_SP13	TAAATGAATTTAATTTCACTATTGGCCAGT	Gut_R1023	GTTGCTTCATATTTTGATTCTACATCAAACCACAAC
Gut_R1023_SP14	CCATAGTATTAAATTTTTATTAACTCATT	Gut_R1023	GTTGCTTCATATTTTGATTCTACATCAAACCACAAC
Gut_R1023_SP15	GTTCATCTCTCCAATCAATAGGTGTAAGCA	Gut_R1023	GTTGCTTCATATTTTGATTCTACATCAAACCACAAC
Gut_R1023_SP16	ATAACTCGTGTTCTATCACATCAATAATC	Gut_R1023	GTTGCTTCATATTTTGATTCTACATCAAACCACAAC
Gut_R1023_SP17	CCTTGGCAGCATATTTTTCGATGTTATTAT	Gut_R1023	GTTGCTTCATATTTTGATTCTACATCAAACCACAAC
Gut_R1023_SP18	GTTTGACGCATTAGTGTCGTTTACCTACA	Gut_R1023	GTTGCTTCATATTTTGATTCTACATCAAACCACAAC
Gut_R1023_SP19	ACAATGCGGAGGTAGCCGCCACGCCAGAAC	Gut_R1023	GTTGCTTCATATTTTGATTCTACATCAAACCACAAC
Gut_R1023_SP2	AAACCCGACACACCTTTTTCTGAACTTTC	Gut_R1023	GTTGCTTCATATTTTGATTCTACATCAAACCACAAC
Gut_R1023_SP20	AGAGGTCATCATCACCGATTCCAAGACCG	Gut_R1023	GTTGCTTCATATTTTGATTCTACATCAAACCACAAC
Gut_R1023_SP21	CATCGAACGTAAGATAGACTTCTTGATCGA	Gut_R1023	GTTGCTTCATATTTTGATTCTACATCAAACCACAAC
Gut_R1023_SP22	CTGTGCGAACAGAACAGTGTTTGAGAAGT	Gut_R1023	GTTGCTTCATATTTTGATTCTACATCAAACCACAAC
Gut_R1023_SP23	TTCTTATCTCACTCATATCGTACCTCCTAT	Gut_R1023	GTTGCTTCATATTTTGATTCTACATCAAACCACAAC
Gut_R1023_SP24	CATAACAACATCGAAAAATATGCTGCCAA	Gut_R1023	GTTGCTTCATATTTTGATTCTACATCAAACCACAAC
Gut_R1023_SP25	CATGCGCACCGTCTGCGTGAGTCCGGTGAG	Gut_R1023	GTTGCTTCATATTTTGATTCTACATCAAACCACAAC
Gut_R1023_SP26	AGTCGTTCATCATCAATGCCGCCTGCCCCG	Gut_R1023	GTTGCTTCATATTTTGATTCTACATCAAACCACAAC
Gut_R1023_SP27	CTGTGCATCGGTGTAGAAAACTATCCTATC	Gut_R1023	GTTGCTTCATATTTTGATTCTACATCAAACCACAAC
Gut_R1023_SP28	GCATAGATGGTGTCTTGCGCCAGCGTGACG	Gut_R1023	GTTGCTTCATATTTTGATTCTACATCAAACCACAAC
Gut_R1023_SP29	CACTGGGAATCAACTTCCTGCCAAATAGAT	Gut_R1023	GTTGCTTCATATTTTGATTCTACATCAAACCACAAC
Gut_R1023_SP3	ACGGACGACATGCTATTGCGTCAAATCATA	Gut_R1023	GTTGCTTCATATTTTGATTCTACATCAAACCACAAC
Gut_R1023_SP30	ATGCAGCGGATGCAGTAGCATAGCCTTGT	Gut_R1023	GTTGCTTCATATTTTGATTCTACATCAAACCACAAC
Gut_R1023_SP31	TTAGATTTTTTATCTATCTTTGCATCAGT	Gut_R1023	GTTGCTTCATATTTTGATTCTACATCAAACCACAAC
Gut_R1023_SP32	CATACGACGGCACGGTGGAAGCACTGTTG	Gut_R1023	GTTGCTTCATATTTTGATTCTACATCAAACCACAAC
Gut_R1023_SP33	ATTCAATATCCTTTGGGAAAAAATCGCCTA	Gut_R1023	GTTGCTTCATATTTTGATTCTACATCAAACCACAAC
Gut_R1023_SP34	TGAATCTGCATATTGTGCAGCACGGTTTT	Gut_R1023	GTTGCTTCATATTTTGATTCTACATCAAACCACAAC
Gut_R1023_SP35	AACCGGCAACCTTTACATCCGCCATTATCT	Gut_R1023	GTTGCTTCATATTTTGATTCTACATCAAACCACAAC
Gut_R1023_SP36	GACATAGAGACATACAGTTCCTACGACCT	Gut_R1023	GTTGCTTCATATTTTGATTCTACATCAAACCACAAC
Gut_R1023_SP37	GTCAATAGCGTATGGGATAAGATTACGAGA	Gut_R1023	GTTGCTTCATATTTTGATTCTACATCAAACCACAAC
Gut_R1023_SP38	TCATCCACATGGACGCCGTGTACTTCTTGC	Gut_R1023	GTTGCTTCATATTTTGATTCTACATCAAACCACAAC
Gut_R1023_SP39	AACAACGTTTTACATCGCTATGGGCGTGAAG	Gut_R1023	GTTGCTTCATATTTTGATTCTACATCAAACCACAAC
Gut_R1023_SP4	GCTTCCGCTGTCAGTGTCTTTTATCTGAC	Gut_R1023	GTTGCTTCATATTTTGATTCTACATCAAACCACAAC
Gut_R1023_SP40	ATATTCTCTGGGTGATAGTACCTTCGCTT	Gut_R1023	GTTGCTTCATATTTTGATTCTACATCAAACCACAAC
Gut_R1023_SP41	TATTCCGAAGCGATATAGTAACGGATTTTT	Gut_R1023	GTTGCTTCATATTTTGATTCTACATCAAACCACAAC
Gut_R1023_SP42	ACCTCCATGGAGAGGCTATAACCACCATT	Gut_R1023	GTTGCTTCATATTTTGATTCTACATCAAACCACAAC
Gut_R1023_SP43	TATTAGACTGTATAGTTCTAAGTTTCTCTA	Gut_R1023	GTTGCTTCATATTTTGATTCTACATCAAACCACAAC
Gut_R1023_SP44	ACTCCGTCCGCATTACCACGGTGT	Gut_R1023	GTTGCTTCATATTTTGATTCTACATCAAACCACAAC
Gut_R1023_SP45	GTAATCTCGTTCGTATTGAAACCGCTGATA	Gut_R1023	GTTGCTTCATATTTTGATTCTACATCAAACCACAAC
Gut_R1023_SP46	TCTCTTGCTGGTCACCTCGGTAAAGTTGC	Gut_R1023	GTTGCTTCATATTTTGATTCTACATCAAACCACAAC
Gut_R1023_SP47	TGTTCCGCAAGTGTAAAGGATATCGTTCT	Gut_R1023	GTTGCTTCATATTTTGATTCTACATCAAACCACAAC
Gut_R1023_SP48	CTGTCATACTCTCCCCTGTAGGGCGTGCTT	Gut_R1023	GTTGCTTCATATTTTGATTCTACATCAAACCACAAC
Gut_R1023_SP49	TAAATGCAGATTTGTCGCTTCATCTTCAG	Gut_R1023	GTTGCTTCATATTTTGATTCTACATCAAACCACAAC
Gut_R1023_SP5	AAGGTCATCAGGAAGATAAGCAAAGTAATT	Gut_R1023	GTTGCTTCATATTTTGATTCTACATCAAACCACAAC
Gut_R1023_SP50	TATATTTTCGGGTGTTCGCCATGACATCCTG	Gut_R1023	GTTGCTTCATATTTTGATTCTACATCAAACCACAAC
Gut_R1023_SP51	TACATCTGTGACGGGTTTTTCACTTGCAG	Gut_R1023	GTTGCTTCATATTTTGATTCTACATCAAACCACAAC
Gut_R1023_SP52	CTCTTCCTGCGTGTGCTGTACTTCCTTTT	Gut_R1023	GTTGCTTCATATTTTGATTCTACATCAAACCACAAC
Gut_R1023_SP53	AATTTTGAATCATCAACCGAGTACACAGAA	Gut_R1023	GTTGCTTCATATTTTGATTCTACATCAAACCACAAC
Gut_R1023_SP54	TCTTTATTAGCAAACATTCTATCTAAATT	Gut_R1023	GTTGCTTCATATTTTGATTCTACATCAAACCACAAC
Gut_R1023_SP55	TGCATGAGCACGCCGCTCAACTTGCTCACT	Gut_R1023	GTTGCTTCATATTTTGATTCTACATCAAACCACAAC
Gut_R1023_SP56	GCAGTTCTTGGGCAGTGTAAAGTTAATGC	Gut_R1023	GTTGCTTCATATTTTGATTCTACATCAAACCACAAC
Gut_R1023_SP57	GCAGTTCATACATCAATTCGATTTCATCG	Gut_R1023	GTTGCTTCATATTTTGATTCTACATCAAACCACAAC
Gut_R1023_SP58	TATACAGGTGGCAGTCTAACCGTTCATCT	Gut_R1023	GTTGCTTCATATTTTGATTCTACATCAAACCACAAC
Gut_R1023_SP59	CACGTCCGTATGCGAAGTACAAACAAGGT	Gut_R1023	GTTGCTTCATATTTTGATTCTACATCAAACCACAAC
Gut_R1023_SP6	AACGGACGAGAGCAAGGTAAACTCTATTG	Gut_R1023	GTTGCTTCATATTTTGATTCTACATCAAACCACAAC
Gut_R1023_SP60	TTACTTTGAAGGTGGAACGGCTTTGTTTCA	Gut_R1023	GTTGCTTCATATTTTGATTCTACATCAAACCACAAC
Gut_R1023_SP61	CCCGAAGGGCTACTTAAAAATTTTTACGG	Gut_R1023	GTTGCTTCATATTTTGATTCTACATCAAACCACAAC
Gut_R1023_SP62	CCTCATCGGCAGTATTAGCATGGTCAGCTT	Gut_R1023	GTTGCTTCATATTTTGATTCTACATCAAACCACAAC
Gut_R1023_SP63	CAACCTTTTGTTCTTCGGGGATTTGATAA	Gut_R1023	GTTGCTTCATATTTTGATTCTACATCAAACCACAAC
Gut_R1023_SP64	TACCGAGTACTGATGTGCATGAGCCTGAA	Gut_R1023	GTTGCTTCATATTTTGATTCTACATCAAACCACAAC
Gut_R1023_SP65	GGAAAAAGCTTCCTTTCACAATGTCTATCG	Gut_R1023	GTTGCTTCATATTTTGATTCTACATCAAACCACAAC
Gut_R1023_SP66	ACTAAGGGGGGGGGAGGTGGGACTATGTTTT	Gut_R1023	GTTGCTTCATATTTTGATTCTACATCAAACCACAAC
Gut_R1023_SP67	GCCCTTTGAACGTTATCTTTTCTCTATTT	Gut_R1023	GTTGCTTCATATTTTGATTCTACATCAAACCACAAC
Gut_R1023_SP68	TGTAATTCGAAGTATTATCAGTCAAGCTCTT	Gut_R1023	GTTGCTTCATATTTTGATTCTACATCAAACCACAAC
Gut_R1023_SP69	TATGTTGTTACAGCTCTCCGCATTGTCAAT	Gut_R1023	GTTGCTTCATATTTTGATTCTACATCAAACCACAAC
Gut_R1023_SP7	AGGTTAAAGATAAATTTACAACCCACGATG	Gut_R1023	GTTGCTTCATATTTTGATTCTACATCAAACCACAAC
Gut_R1023_SP70	ATAATTGCTTTTCTATCTTTCTTCCTTAA	Gut_R1023	GTTGCTTCATATTTTGATTCTACATCAAACCACAAC
Gut_R1023_SP71	GTGGTAGTGATGATTACCGCTGCCCCTTTC	Gut_R1023	GTTGCTTCATATTTTGATTCTACATCAAACCACAAC
Gut_R1023_SP72	GATCCAAATAACCCCTAATTCTTTGAATCA	Gut_R1023	GTTGCTTCATATTTTGATTCTACATCAAACCACAAC
Gut_R1023_SP8	TCCTTCTCTATGGATATTTCATGTCCCTCC	Gut_R1023	GTTGCTTCATATTTTGATTCTACATCAAACCACAAC
Gut_R1023_SP9	ACTTCTTGGTCGATTGCAAACGAAAGACG	Gut_R1023	GTTGCTTCATATTTTGATTCTACATCAAACCACAAC
Gut_R1024_SP1	AACGGTTATCCACAGTCATTGAAAGAAGCT	Gut_R1024	GTTGCTTCATATCTTGATTCTACATCAAACCACAAC
Gut_R1024_SP10	AATAGGGCTACTTTGAATTTCTTCTTTGT	Gut_R1024	GTTGCTTCATATCTTGATTCTACATCAAACCACAAC
Gut_R1024_SP11	TCTTTACTTCTTACATAAATCATGTCCTTC	Gut_R1024	GTTGCTTCATATCTTGATTCTACATCAAACCACAAC
Gut_R1024_SP12	GGTAAGGCACTATTCACTTATGAATGTGAA	Gut_R1024	GTTGCTTCATATCTTGATTCTACATCAAACCACAAC
Gut_R1024_SP13	CGTGTTATGGATTCAATTTTCGCGATGATG	Gut_R1024	GTTGCTTCATATCTTGATTCTACATCAAACCACAAC
Gut_R1024_SP14	TCGTGTCCGCAAGCATATCCTGCAACTCT	Gut_R1024	GTTGCTTCATATCTTGATTCTACATCAAACCACAAC
Gut_R1024_SP15	TGAACGAAGCGATGAAGGCTGAGTTGCAG	Gut_R1024	GTTGCTTCATATCTTGATTCTACATCAAACCACAAC
Gut_R1024_SP16	GCTGCCAACACCTAACGGCACCATGCGCA	Gut_R1024	GTTGCTTCATATCTTGATTCTACATCAAACCACAAC
Gut_R1024_SP17	CTTGTAGTTAATTCTCACTATTCCTTTTG	Gut_R1024	GTTGCTTCATATCTTGATTCTACATCAAACCACAAC
Gut_R1024_SP18	TCTCGGCTTGCTTGCGCAGTTCTTCATCC	Gut_R1024	GTTGCTTCATATCTTGATTCTACATCAAACCACAAC
Gut_R1024_SP19	AAGTTCAAGGCAATGAAAGATACGGCAGAG	Gut_R1024	GTTGCTTCATATCTTGATTCTACATCAAACCACAAC
Gut_R1024_SP2	TGCGAGCGTTGCGCGGTGGACGGCAATAA	Gut_R1024	GTTGCTTCATATCTTGATTCTACATCAAACCACAAC
Gut_R1024_SP20	TCGTGGGCGTTAAGATTTTGATCCGTCTCC	Gut_R1024	GTTGCTTCATATCTTGATTCTACATCAAACCACAAC
Gut_R1024_SP21	AGTTATCAGAAACGTGTAGAGGAGATAAAC	Gut_R1024	GTTGCTTCATATCTTGATTCTACATCAAACCACAAC
Gut_R1024_SP22	AGATACTTATAATTAATCCTGTGGTGTAT	Gut_R1024	GTTGCTTCATATCTTGATTCTACATCAAACCACAAC
Gut_R1024_SP23	TAAATGCAGATTTGTCGCTTCATCTTCAG	Gut_R1024	GTTGCTTCATATCTTGATTCTACATCAAACCACAAC
Gut_R1024_SP24	TATATTTTCGGGTGTTCGCCATGACATCCT	Gut_R1024	GTTGCTTCATATCTTGATTCTACATCAAACCACAAC
Gut_R1024_SP25	ATAGCGATAGCACCACAGAGCGCAGCGGTT	Gut_R1024	GTTGCTTCATATCTTGATTCTACATCAAACCACAAC
Gut_R1024_SP26	CTGAATTTAAGTCTAATATGAAACAGTTA	Gut_R1024	GTTGCTTCATATCTTGATTCTACATCAAACCACAAC
Gut_R1024_SP27	AAGCCTTTGAATTTATCACTATTGGTTTT	Gut_R1024	GTTGCTTCATATCTTGATTCTACATCAAACCACAAC
Gut_R1024_SP28	CGCTTTTTTCTTCCCCTGCTGTTGATGAA	Gut_R1024	GTTGCTTCATATCTTGATTCTACATCAAACCACAAC
Gut_R1024_SP29	AGGCTGACGAGTTCTTGAGTGAGTTGCGAG	Gut_R1024	GTTGCTTCATATCTTGATTCTACATCAAACCACAAC
Gut_R1024_SP3	AGCTAAGTTAATACTTTCCTAATAAGTTGA	Gut_R1024	GTTGCTTCATATCTTGATTCTACATCAAACCACAAC
Gut_R1024_SP30	TGGTAATGGAGTTAGCTTATCCAAAGAAG	Gut_R1024	GTTGCTTCATATCTTGATTCTACATCAAACCACAAC
Gut_R1024_SP31	TGGTCGACACCCTAGCATATCCTATTTTT	Gut_R1024	GTTGCTTCATATCTTGATTCTACATCAAACCACAAC
Gut_R1024_SP32	AAGCGTGCAGGGTACGCCAACTTCATCAA	Gut_R1024	GTTGCTTCATATCTTGATTCTACATCAAACCACAAC
Gut_R1024_SP33	TGTTCAAGATCTACGATTAAGCATGAAGG	Gut_R1024	GTTGCTTCATATCTTGATTCTACATCAAACCACAAC
Gut_R1024_SP34	GGTAGGTTTGTGTGTGAGAATGACATGAT	Gut_R1024	GTTGCTTCATATCTTGATTCTACATCAAACCACAAC
Gut_R1024_SP35	TGTGCGTTGAGCCTTACGACAGTTTCAAA	Gut_R1024	GTTGCTTCATATCTTGATTCTACATCAAACCACAAC
Gut_R1024_SP36	GGTCGCCTTGAGTATCTGCACTATGTCGGT	Gut_R1024	GTTGCTTCATATCTTGATTCTACATCAAACCACAAC
Gut_R1024_SP37	CATCTTTGATTAATCTTGGTACAATTCTTC	Gut_R1024	GTTGCTTCATATCTTGATTCTACATCAAACCACAAC
Gut_R1024_SP38	GTGCGGCTGAAAGATTATCTCGGGAAGTAC	Gut_R1024	GTTGCTTCATATCTTGATTCTACATCAAACCACAAC
Gut_R1024_SP39	GGTTCTGCTGCAGGTACTTTATTGAAACTT	Gut_R1024	GTTGCTTCATATCTTGATTCTACATCAAACCACAAC
Gut_R1024_SP4	GCATTGCTGACCAACAAGCCTGTGTTACC	Gut_R1024	GTTGCTTCATATCTTGATTCTACATCAAACCACAAC
Gut_R1024_SP40	ATCTTGTTCAGTTTTATCTGTTAAATCAAA	Gut_R1024	GTTGCTTCATATCTTGATTCTACATCAAACCACAAC
Gut_R1024_SP41	AGTGTCTGCAAGACTCTGCCATACCGCTTT	Gut_R1024	GTTGCTTCATATCTTGATTCTACATCAAACCACAAC
Gut_R1024_SP42	CATAAAGGTCTTCAGCGTGAAACGGTGTAC	Gut_R1024	GTTGCTTCATATCTTGATTCTACATCAAACCACAAC
Gut_R1024_SP43	TATACAGGTGGCAGTCTAACCGTTCATCT	Gut_R1024	GTTGCTTCATATCTTGATTCTACATCAAACCACAAC
Gut_R1024_SP44	GCAGTTCTTGGGCAGTGTAAAGTTAATGC	Gut_R1024	GTTGCTTCATATCTTGATTCTACATCAAACCACAAC
Gut_R1024_SP45	TCCACACAATAAATTGCTCATCGGAACTGT	Gut_R1024	GTTGCTTCATATCTTGATTCTACATCAAACCACAAC
Gut_R1024_SP46	TATGACATACATCCATTCACATACTGGAAA	Gut_R1024	GTTGCTTCATATCTTGATTCTACATCAAACCACAAC
Gut_R1024_SP47	TCCAATTACACGCCACAGAGCCAATTCTT	Gut_R1024	GTTGCTTCATATCTTGATTCTACATCAAACCACAAC
Gut_R1024_SP48	AAAAATGCCTATAAACAAACCCAATTTTTT	Gut_R1024	GTTGCTTCATATCTTGATTCTACATCAAACCACAAC
Gut_R1024_SP49	TGATAGGTGTAATATTCTTTGCATTTATCT	Gut_R1024	GTTGCTTCATATCTTGATTCTACATCAAACCACAAC
Gut_R1024_SP5	TGAACAGTGTAGACTGGAAGAGACGGACGA	Gut_R1024	GTTGCTTCATATCTTGATTCTACATCAAACCACAAC
Gut_R1024_SP50	TGGACACACGCTCCTTCTTCCGCTTCGTGT	Gut_R1024	GTTGCTTCATATCTTGATTCTACATCAAACCACAAC
Gut_R1024_SP51	TTGTTTACTTCTTACATAAATCATGTCTTTT	Gut_R1024	GTTGCTTCATATCTTGATTCTACATCAAACCACAAC
Gut_R1024_SP52	TTATTTTCTTCTCCTGCTGTTGATGAAAA	Gut_R1024	GTTGCTTCATATCTTGATTCTACATCAAACCACAAC
Gut_R1024_SP53	GAGAACGTGGAGATTGTACCGCTGTCGTG	Gut_R1024	GTTGCTTCATATCTTGATTCTACATCAAACCACAAC
Gut_R1024_SP54	AATGCAGCGGAAGAAGAGCGCAAGCAAGCC	Gut_R1024	GTTGCTTCATATCTTGATTCTACATCAAACCACAAC
Gut_R1024_SP6	CAGTGGAGTGATCCGTTCGGTTTCCCTGCT	Gut_R1024	GTTGCTTCATATCTTGATTCTACATCAAACCACAAC
Gut_R1024_SP7	ACGGCACATTCGTTACCTCTTCGTGGTCGG	Gut_R1024	GTTGCTTCATATCTTGATTCTACATCAAACCACAAC
Gut_R1024_SP8	ACACGGTGCAGCGGTGGGACAGCGTTTATT	Gut_R1024	GTTGCTTCATATCTTGATTCTACATCAAACCACAAC
Gut_R1024_SP9	CTATGCGTCATTTGATAGAGAAACTTGCGA	Gut_R1024	GTTGCTTCATATCTTGATTCTACATCAAACCACAAC
Gut_R1025_SP1	TTTCCGATGCTGGAAATATTTACCGCT	Gut_R1025	ATGTTGCTTTATATCTTGATTCTACATCAAACCACAAC
Gut_R1025_SP10	TCGATCTATCTTGAAGATTCTTATACT	Gut_R1025	ATGTTGCTTTATATCTTGATTCTACATCAAACCACAAC
Gut_R1025_SP11	GTTTGAGGTGATTTACCTTTGAAGTGTG	Gut_R1025	ATGTTGCTTTATATCTTGATTCTACATCAAACCACAAC
Gut_R1025_SP12	CTTAGAGATTTTTTCCCAAGCATCCGA	Gut_R1025	ATGTTGCTTTATATCTTGATTCTACATCAAACCACAAC
Gut_R1025_SP13	ACACGGTGCAGCGGTGGGACAGCGTTTA	Gut_R1025	ATGTTGCTTTATATCTTGATTCTACATCAAACCACAAC
Gut_R1025_SP14	CTATGCGTCATTTGATAGAGAAACTTGCGA	Gut_R1025	ATGTTGCTTTATATCTTGATTCTACATCAAACCACAAC
Gut_R1025_SP15	ATGACGGTGAATTCCGCTGGTACTTTAC	Gut_R1025	ATGTTGCTTTATATCTTGATTCTACATCAAACCACAAC
Gut_R1025_SP16	AATAGGGCTACTTTGAATTTCTTCTTT	Gut_R1025	ATGTTGCTTTATATCTTGATTCTACATCAAACCACAAC
Gut_R1025_SP17	AGTTATCAGAAACGTGTAGAGGAGATAA	Gut_R1025	ATGTTGCTTTATATCTTGATTCTACATCAAACCACAAC
Gut_R1025_SP18	TGTATAGCTCTGTGGGTGGGCTTCGGA	Gut_R1025	ATGTTGCTTTATATCTTGATTCTACATCAAACCACAAC
Gut_R1025_SP19	AGTGAGAATGTCGTATCACCCGTGCCAT	Gut_R1025	ATGTTGCTTTATATCTTGATTCTACATCAAACCACAAC
Gut_R1025_SP2	AGTGTCTGCAAGACTCTGCCATACCGCT	Gut_R1025	ATGTTGCTTTATATCTTGATTCTACATCAAACCACAAC
Gut_R1025_SP20	AATTCTGTCTTCAACGTGCCGTATGCTT	Gut_R1025	ATGTTGCTTTATATCTTGATTCTACATCAAACCACAAC
Gut_R1025_SP21	AATGCTCGCCATCCTTACGAAATATTA	Gut_R1025	ATGTTGCTTTATATCTTGATTCTACATCAAACCACAAC
Gut_R1025_SP22	GCAGTCCCCATAGCGATAGCACCTAAC	Gut_R1025	ATGTTGCTTTATATCTTGATTCTACATCAAACCACAAC
Gut_R1025_SP23	TCGTGGGCGTTAAGATTTTGATCCGTCT	Gut_R1025	ATGTTGCTTTATATCTTGATTCTACATCAAACCACAAC
Gut_R1025_SP24	TAATATTACATTATCTTTTACTAACTCT	Gut_R1025	ATGTTGCTTTATATCTTGATTCTACATCAAACCACAAC
Gut_R1025_SP25	ACGACCTTGCGTCCGCATTACCACGGT	Gut_R1025	ATGTTGCTTTATATCTTGATTCTACATCAAACCACAAC
Gut_R1025_SP26	ACGACCTACCGTCCGCATTACCACGGTA	Gut_R1025	ATGTTGCTTTATATCTTGATTCTACATCAAACCACAAC
Gut_R1025_SP27	GTCCCAAAATTGTTCCCACTTCGCTTGC	Gut_R1025	ATGTTGCTTTATATCTTGATTCTACATCAAACCACAAC
Gut_R1025_SP28	CCTCATGAAGTACAACGATGACGTGCGA	Gut_R1025	ATGTTGCTTTATATCTTGATTCTACATCAAACCACAAC
Gut_R1025_SP29	AATATGCCTTGCTGTTCGTCACCAATG	Gut_R1025	ATGTTGCTTTATATCTTGATTCTACATCAAACCACAAC
Gut_R1025_SP3	TAACTTGCATTCTTCAATTAAATCTCCT	Gut_R1025	ATGTTGCTTTATATCTTGATTCTACATCAAACCACAAC
Gut_R1025_SP30	ATTCTACTTGTTGCTGTGCAAAGAAGAT	Gut_R1025	ATGTTGCTTTATATCTTGATTCTACATCAAACCACAAC
Gut_R1025_SP31	TACGCTGTGGTGGTGAACAAGGACGGCT	Gut_R1025	ATGTTGCTTTATATCTTGATTCTACATCAAACCACAAC
Gut_R1025_SP32	GCAACAAGTTCCTCGAAGGAATAGTAC	Gut_R1025	ATGTTGCTTTATATCTTGATTCTACATCAAACCACAAC
Gut_R1025_SP33	GGATTTGTCGGCACTGACAAATGGTAG	Gut_R1025	ATGTTGCTTTATATCTTGATTCTACATCAAACCACAAC
Gut_R1025_SP34	CATGCGACGGTGATAAGGCTTTCGAGCTA	Gut_R1025	ATGTTGCTTTATATCTTGATTCTACATCAAACCACAAC
Gut_R1025_SP35	TTGGCTCAATTTCGTAAATCACGGGCAA	Gut_R1025	ATGTTGCTTTATATCTTGATTCTACATCAAACCACAAC
Gut_R1025_SP36	ACACAACCCCCAGAATTTTTCTTCCAT	Gut_R1025	ATGTTGCTTTATATCTTGATTCTACATCAAACCACAAC
Gut_R1025_SP37	TCAAAGAACGCTCCACGATGAAGTTCTC	Gut_R1025	ATGTTGCTTTATATCTTGATTCTACATCAAACCACAAC
Gut_R1025_SP38	AACAGATGGAGAAATAAAAAGTACGGCG	Gut_R1025	ATGTTGCTTTATATCTTGATTCTACATCAAACCACAAC
Gut_R1025_SP39	TTGCTCTTGTTTCTGATATTCCTCCTT	Gut_R1025	ATGTTGCTTTATATCTTGATTCTACATCAAACCACAAC
Gut_R1025_SP4	AAGAGTACGTATTCACTCAATCGGATA	Gut_R1025	ATGTTGCTTTATATCTTGATTCTACATCAAACCACAAC
Gut_R1025_SP40	AATGATAATGCGCTCGTGCTTCACAAG	Gut_R1025	ATGTTGCTTTATATCTTGATTCTACATCAAACCACAAC
Gut_R1025_SP41	TACGTACCGTTCACTTTTGGGCAGTTCA	Gut_R1025	ATGTTGCTTTATATCTTGATTCTACATCAAACCACAAC
Gut_R1025_SP42	CTGCCACCAGTTTTAACTTTATCTAAT	Gut_R1025	ATGTTGCTTTATATCTTGATTCTACATCAAACCACAAC
Gut_R1025_SP43	TTTAGTACTGTATAGATTTTTGATGTTA	Gut_R1025	ATGTTGCTTTATATCTTGATTCTACATCAAACCACAAC
Gut_R1025_SP44	GCATTGCTGACCAACAAGCCTGTGTTA	Gut_R1025	ATGTTGCTTTATATCTTGATTCTACATCAAACCACAAC
Gut_R1025_SP45	CAGTGGAGTGATCCGTTCGGTTTCCCTG	Gut_R1025	ATGTTGCTTTATATCTTGATTCTACATCAAACCACAAC
Gut_R1025_SP46	AGGTAGCGGTTCTGGCCATATTGAATTT	Gut_R1025	ATGTTGCTTTATATCTTGATTCTACATCAAACCACAAC
Gut_R1025_SP47	TATACAGTTGATATAAAGCAACCTAAT	Gut_R1025	ATGTTGCTTTATATCTTGATTCTACATCAAACCACAAC
Gut_R1025_SP48	AACGACTTTAATAACTCTTTTCTTTCAA	Gut_R1025	ATGTTGCTTTATATCTTGATTCTACATCAAACCACAAC
Gut_R1025_SP49	AACACCATCGAGCATCTTCCTGGCCACG	Gut_R1025	ATGTTGCTTTATATCTTGATTCTACATCAAACCACAAC
Gut_R1025_SP5	TATTCTCTCTTCAAAAATCCATAAACTT	Gut_R1025	ATGTTGCTTTATATCTTGATTCTACATCAAACCACAAC
Gut_R1025_SP50	AGTTCACCGCATAGCCATTAAGATGACA	Gut_R1025	ATGTTGCTTTATATCTTGATTCTACATCAAACCACAAC
Gut_R1025_SP51	TACCGGGGAGTATATTCACCAACGGCGA	Gut_R1025	ATGTTGCTTTATATCTTGATTCTACATCAAACCACAAC
Gut_R1025_SP52	TCGATAGCACTCATCAGTGAAAAGGTGC	Gut_R1025	ATGTTGCTTTATATCTTGATTCTACATCAAACCACAAC
Gut_R1025_SP53	GAGCGATAATGGCGGACTTGAGTCTATC	Gut_R1025	ATGTTGCTTTATATCTTGATTCTACATCAAACCACAAC
Gut_R1025_SP54	GGCGTCTTAAATGGTATTGTTGGTGCCT	Gut_R1025	ATGTTGCTTTATATCTTGATTCTACATCAAACCACAAC
Gut_R1025_SP55	GGTAGGTTTGTGTGTGAGAATGACATG	Gut_R1025	ATGTTGCTTTATATCTTGATTCTACATCAAACCACAAC
Gut_R1025_SP56	AGTTATGTGCGCCACTTGGACGTTAGA	Gut_R1025	ATGTTGCTTTATATCTTGATTCTACATCAAACCACAAC
Gut_R1025_SP57	ATACAGATTGCCACCATCAAGAAGCAG	Gut_R1025	ATGTTGCTTTATATCTTGATTCTACATCAAACCACAAC
Gut_R1025_SP58	AACGGTTATCCACAGTCATTGAAAGAAG	Gut_R1025	ATGTTGCTTTATATCTTGATTCTACATCAAACCACAAC
Gut_R1025_SP59	ATATATGAGTACTACGCTACGTTCACTG	Gut_R1025	ATGTTGCTTTATATCTTGATTCTACATCAAACCACAAC
Gut_R1025_SP6	GACATCTTCGAGTATGCCAACACGTCG	Gut_R1025	ATGTTGCTTTATATCTTGATTCTACATCAAACCACAAC
Gut_R1025_SP60	GCAGCCGTTGCAAGGTCGCTTTATTTCT	Gut_R1025	ATGTTGCTTTATATCTTGATTCTACATCAAACCACAAC
Gut_R1025_SP61	GAATGTATGTTAAGAACTCATTAATTG	Gut_R1025	ATGTTGCTTTATATCTTGATTCTACATCAAACCACAAC
Gut_R1025_SP62	ATGCAGGTTTCACGATTAGAGCATTGAC	Gut_R1025	ATGTTGCTTTATATCTTGATTCTACATCAAACCACAAC
Gut_R1025_SP7	CCCCTACTTTTAATAATACCAATAATAT	Gut_R1025	ATGTTGCTTTATATCTTGATTCTACATCAAACCACAAC
Gut_R1025_SP8	ATTGAATTTGATGCCCACGAACATGGTA	Gut_R1025	ATGTTGCTTTATATCTTGATTCTACATCAAACCACAAC
Gut_R1025_SP9	ATCATAGAGGAAATAGTCGAGCTGTCAA	Gut_R1025	ATGTTGCTTTATATCTTGATTCTACATCAAACCACAAC
Gut_R1026_SP1	TATTATCCCAATCAACACCAGTTACAAGACCATCAC	Gut_R1026	ATTTCAACTCACACCACCCATGTGGGTGGCGAC
Gut_R1026_SP2	TAAGACTTACGTTCCTGTAACTGTCGGCACTGGA	Gut_R1026	ATTTCAACTCACACCACCCATGTGGGTGGCGAC
Gut_R1026_SP3	GCAAAACAACAAAAATACCGTTAGCCAGTATGCCGA	Gut_R1026	ATTTCAACTCACACCACCCATGTGGGTGGCGAC
Gut_R1027_SP1	ACCTCTGTTTTACGAGGGTGAATTGAGCAAAGC	Gut_R1027	ATTTCAACTCACGCCACCCATGTGGGTGGCGACA
Gut_R1027_SP2	GTGTGCCGTAAGCATTGCAAAGCTCCGCGTTT	Gut_R1027	ATTTCAACTCACGCCACCCATGTGGGTGGCGACA
Gut_R1027_SP3	TGTAGCCGAGTCCTTTGTTGCTGATAAAATTTTT	Gut_R1027	ATTTCAACTCACGCCACCCATGTGGGTGGCGACA
Gut_R1028_SP1	CCCGCTGCCGGACGCCGACAAGGTGGCAGAGCCAGAAA	Gut_R1028	AGTTTTCGTCCCCGTGAGGGGTATGAGTTTCATC
Gut_R1028_SP2	AACAGCGCGCTTGACCAGATCGAGGCATGGATAGACGAA	Gut_R1028	AGTTTTCGTCCCCGTGAGGGGTATGAGTTTCATC
Gut_R1028_SP3	TTGATAGTCAGTCGGTAACGGCGATCGCGGCTT	Gut_R1028	AGTTTTCGTCCCCGTGAGGGGTATGAGTTTCATC
Gut_R1028_SP4	GCAAACGTTATCAGGCGTATACATTGGCGCAAC	Gut_R1028	AGTTTTCGTCCCCGTGAGGGGTATGAGTTTCATC
Gut_R1029_SP1	TGTATTCCGCTCTTAATCCTGCTTTTCCAGCATT	Gut_R1029	GCTTCAATCCACTTCCCTCTTGCGAGGGAAGAC
Gut_R1029_SP2	GATTACGATACTTGTAAGTGAAATAAGCAAAAA	Gut_R1029	GCTTCAATCCACTTCCCTCTTGCGAGGGAAGAC
Gut_R1029_SP3	ATGATTGCAATGGTGGCTGTTATGCTTTCCAT	Gut_R1029	GCTTCAATCCACTTCCCTCTTGCGAGGGAAGAC
Gut_R1029_SP4	GTAATCCTGCAAAACACCAGTATCATAAGCGTC	Gut_R1029	GCTTCAATCCACTTCCCTCTTGCGAGGGAAGAC
Gut_R1029_SP5	AATTATACCTGTTCACCTTTTTACCGTCAAAAGT	Gut_R1029	GCTTCAATCCACTTCCCTCTTGCGAGGGAAGAC
Gut_R1029_SP6	ATTTGACTTCCCCTTTCAATGTATGATATAGTGA	Gut_R1029	GCTTCAATCCACTTCCCTCTTGCGAGGGAAGAC
Gut_R103_SP1	CTTTTAACCGAGGAAATAAAGCTCGACTCCCTCA	Gut_R103	ATTTCAATCCACTCGCTCCACGCGAGACAAAACGC
Gut_R103_SP2	TGGATAAAAATGCCTACTACTTCGAGATTACCGA	Gut_R103	ATTTCAATCCACTCGCTCCACGCGAGACAAAACGC
Gut_R103_SP3	GCCGCGGCGAGCCTTTCTCTATTACGGAGTAT	Gut_R103	ATTTCAATCCACTCGCTCCACGCGAGACAAAACGC
Gut_R103_SP4	CCGAGCAGCTCTTTGGGATCATACCCATAAGC	Gut_R103	ATTTCAATCCACTCGCTCCACGCGAGACAAAACGC
Gut_R1030_SP1	CTACGTTTACTTATGTTTCTTTGTCCGGACGG	Gut_R1030	ATATTTCAATCCACTTCCCTCTCACGAGGGAAGAC
Gut_R1030_SP2	CTTCGGAAGTTCCAGAGGATATGGAATTGG	Gut_R1030	ATATTTCAATCCACTTCCCTCTCACGAGGGAAGAC
Gut_R1030_SP3	GGTTTCTCCTGTTTCTCTTTATGCTATTAAC	Gut_R1030	ATATTTCAATCCACTTCCCTCTCACGAGGGAAGAC
Gut_R1031_SP1	CGACACAATAACGCACATTTTGACCGTGCCTTTGT	Gut_R1031	CGTTTTTTTGTAAAAGGCACGGTCGCGCA
Gut_R1031_SP2	TGACCCTCGTCCTCGCTTTTCGACCGTGCCTTTCC	Gut_R1031	CGTTTTTTTGTAAAAGGCACGGTCGCGCA
Gut_R1031_SP3	ACCCGTCTGGGCGCACTTTCCGACCGTGCCTTTGGC	Gut_R1031	CGTTTTTTTGTAAAAGGCACGGTCGCGCA
Gut_R1032_SP1	TTCATCAAATGCATCATCTCCT	Gut_R1032	ATACTTGTTACACTATTTGGTATTGTTATACTTGTTAAATTTGTACA
Gut_R1032_SP2	ATAAGAAAATGCAAAATTTTCT	Gut_R1032	ATACTTGTTACACTATTTGGTATTGTTATACTTGTTAAATTTGTACA
Gut_R1032_SP3	ACATTCAAATGCATACTCTCTT	Gut_R1032	ATACTTGTTACACTATTTGGTATTGTTATACTTGTTAAATTTGTACA
Gut_R1033_SP1	ATTATATTCCAGATGAGTTTAAGTCGTACATT	Gut_R1033	ATTTCAATCCACGCTCCCACGAGAGGAGCGACA
Gut_R1033_SP10	GCGAGCCGATAGAGTTTTTAAAACGCTATTGTGA	Gut_R1033	ATTTCAATCCACGCTCCCACGAGAGGAGCGACA
Gut_R1033_SP11	TTGTCAGGAATTGCAAATTGACGACTTGAAAAAC	Gut_R1033	ATTTCAATCCACGCTCCCACGAGAGGAGCGACA
Gut_R1033_SP12	GGGGGTGTATTATGTCTAATTATGAGTATTTAG	Gut_R1033	ATTTCAATCCACGCTCCCACGAGAGGAGCGACA
Gut_R1033_SP13	GCTTTATTGGTTGGTCAAGGAATGGTGCTACCTTT	Gut_R1033	ATTTCAATCCACGCTCCCACGAGAGGAGCGACA
Gut_R1033_SP14	AGACCGTCATGATCAGACAGACATATGTTGTAT	Gut_R1033	ATTTCAATCCACGCTCCCACGAGAGGAGCGACA
Gut_R1033_SP15	CATAACGCCGGAACAGTGGGAACAGCTAAAGA	Gut_R1033	ATTTCAATCCACGCTCCCACGAGAGGAGCGACA
Gut_R1033_SP16	ATGGGTGATGGCTATCAAGAGGTGCAGGAAGTA	Gut_R1033	ATTTCAATCCACGCTCCCACGAGAGGAGCGACA
Gut_R1033_SP2	ATGACATCAGACGAGACCGGCATGGTGGCTAT	Gut_R1033	ATTTCAATCCACGCTCCCACGAGAGGAGCGACA
Gut_R1033_SP3	CTGATGAATGGCTGTATGATGAAGAATATTTGA	Gut_R1033	ATTTCAATCCACGCTCCCACGAGAGGAGCGACA
Gut_R1033_SP4	TAAACTGCCGCTTTGCAAAAGGCACAAAAGACA	Gut_R1033	ATTTCAATCCACGCTCCCACGAGAGGAGCGACA
Gut_R1033_SP5	ATATAGATTGTGGTGTTATAGATAACTGGAGATT	Gut_R1033	ATTTCAATCCACGCTCCCACGAGAGGAGCGACA
Gut_R1033_SP6	AGGCGCAAAATTATTTAGAATGCTAGAATATA	Gut_R1033	ATTTCAATCCACGCTCCCACGAGAGGAGCGACA
Gut_R1033_SP7	AGGCACAAAATTATTTAAAATGCTATTATATA	Gut_R1033	ATTTCAATCCACGCTCCCACGAGAGGAGCGACA
Gut_R1033_SP8	AAACATATTTACGAGTTTAGAAACCATTTTACT	Gut_R1033	ATTTCAATCCACGCTCCCACGAGAGGAGCGACA
Gut_R1033_SP9	CCAACCAAACGACAGACGCCAAACAAAATATTAT	Gut_R1033	ATTTCAATCCACGCTCCCACGAGAGGAGCGACA
Gut_R1034_SP1	ACCTGAATACGAACGATTGTGTAATATG	Gut_R1034	GTCGCTCCTCTCGTGGGAGCGTGGATTGAAATTGAAGA
Gut_R1034_SP2	CTGGAATAAAAGCAGACAGTCGTTACAC	Gut_R1034	GTCGCTCCTCTCGTGGGAGCGTGGATTGAAATTGAAGA
Gut_R1034_SP3	TAGCGTTTTAAAAACTCTATCGGCTCGCA	Gut_R1034	GTCGCTCCTCTCGTGGGAGCGTGGATTGAAATTGAAGA
Gut_R1034_SP4	TGGCATATCACTGAGCATTTCGCTGT	Gut_R1034	GTCGCTCCTCTCGTGGGAGCGTGGATTGAAATTGAAGA
Gut_R1034_SP5	ATTCTTCATCATACAGCCATTCATCAGT	Gut_R1034	GTCGCTCCTCTCGTGGGAGCGTGGATTGAAATTGAAGA
Gut_R1034_SP6	CATATGTCTGTCTGATCATGACGGTCTG	Gut_R1034	GTCGCTCCTCTCGTGGGAGCGTGGATTGAAATTGAAGA
Gut_R1034_SP7	TTAACTTATATTCCGTGGCTTTTAACGAC	Gut_R1034	GTCGCTCCTCTCGTGGGAGCGTGGATTGAAATTGAAGA
Gut_R1034_SP8	CTGCACCTCTTGATAGCCATCACCCATT	Gut_R1034	GTCGCTCCTCTCGTGGGAGCGTGGATTGAAATTGAAGA
Gut_R1035_SP1	GTACGACTTAAACTCATCTGGAATATA	Gut_R1035	ATTGTCGCTCCTCTCGTGGGAGCGTGGATTGAAATCAA
Gut_R1035_SP2	TGCTTAACTTATATTCCGTGGCTTTTAAC	Gut_R1035	ATTGTCGCTCCTCTCGTGGGAGCGTGGATTGAAATCAA
Gut_R1035_SP3	GCCACCATGCCGGTCTCGTCTGATGTC	Gut_R1035	ATTGTCGCTCCTCTCGTGGGAGCGTGGATTGAAATCAA
Gut_R1035_SP4	AATACTCATAATTAGACATAATACACCC	Gut_R1035	ATTGTCGCTCCTCTCGTGGGAGCGTGGATTGAAATCAA
Gut_R1036_SP1	CTATCCTCGTGAATTTCCCTATCCTCTTCGTG	Gut_R1036	GATTTCAATCCACGCTCCCACGAGAGGAGCGAC
Gut_R1036_SP2	AGGGGGTGTATTATGTCTAATTATGAGTATTTA	Gut_R1036	GATTTCAATCCACGCTCCCACGAGAGGAGCGAC
Gut_R1036_SP3	CAAGGCACAAAATTATTTAAAATGCTATTATAT	Gut_R1036	GATTTCAATCCACGCTCCCACGAGAGGAGCGAC
Gut_R1037_SP1	TTATATTCCAGATGAGTTTAAGTCGTACATT	Gut_R1037	ATTTCAATCCACGCTCCCACGAGAGGAGCGACTA
Gut_R1037_SP2	TGACATCAGACGAGACCGGCATGGTGGCTAT	Gut_R1037	ATTTCAATCCACGCTCCCACGAGAGGAGCGACTA
Gut_R1037_SP3	GGGGGTGTATTATGTCTAATTATGAGTATTTAG	Gut_R1037	ATTTCAATCCACGCTCCCACGAGAGGAGCGACTA
Gut_R1037_SP4	AGGCACAAAATTATTTAAAATGCTATTATATA	Gut_R1037	ATTTCAATCCACGCTCCCACGAGAGGAGCGACTA
Gut_R1037_SP5	CACCGGGGACTACACCTTTGAGGTGACACTG	Gut_R1037	ATTTCAATCCACGCTCCCACGAGAGGAGCGACTA
Gut_R1037_SP6	ATAACGCCGGAACAGTGGGAACAGCTAAAGA	Gut_R1037	ATTTCAATCCACGCTCCCACGAGAGGAGCGACTA
Gut_R1038_SP1	AACGTACTGACTAACTTGATAGGCGGAAT	Gut_R1038	CAGTGTCGCTCCTCTCGTGGGAGCGTGGATTGAAATA
Gut_R1038_SP2	TAATATTTTGTTTGGCGTCTGTCGTTTGGT	Gut_R1038	CAGTGTCGCTCCTCTCGTGGGAGCGTGGATTGAAATA
Gut_R1038_SP3	CAAATATTCTTCATCATACAGCCATTCAT	Gut_R1038	CAGTGTCGCTCCTCTCGTGGGAGCGTGGATTGAAATA
Gut_R1038_SP4	TAGCCACCATGCCGGTCTCGTCTGATGT	Gut_R1038	CAGTGTCGCTCCTCTCGTGGGAGCGTGGATTGAAATA
Gut_R1038_SP5	CTTGATGGCATATCACTGAGCATTTCG	Gut_R1038	CAGTGTCGCTCCTCTCGTGGGAGCGTGGATTGAAATA
Gut_R1039_SP1	CTTGTCAGGAATTGCAAATTGACGACTTGAAAAAC	Gut_R1039	ATTTCAATCCACGCTCCCACGAGAGGAGCGAC
Gut_R1039_SP2	AGGGGGTGTATTATGTCTAATTATGAGTATTTAG	Gut_R1039	ATTTCAATCCACGCTCCCACGAGAGGAGCGAC
Gut_R1039_SP3	TTCACCGGGGACTACACCTTTGAGGTGACACTG	Gut_R1039	ATTTCAATCCACGCTCCCACGAGAGGAGCGAC
Gut_R1039_SP4	ACATAACGCCGGAACAGTGGGAACAGCTAAAGA	Gut_R1039	ATTTCAATCCACGCTCCCACGAGAGGAGCGAC
Gut_R104_SP1	AGTGATGCACCATGCTCCAGCATATCCGT	Gut_R104	GTTTCTATACAGACCCGCTCGTAAGGCGGGTCATA
Gut_R104_SP2	GATGCCAGTTCCAATTTTATAGACTACGGA	Gut_R104	GTTTCTATACAGACCCGCTCGTAAGGCGGGTCATA
Gut_R104_SP3	GGATTTCTACCGTGAAATGGGTCTAAGGGT	Gut_R104	GTTTCTATACAGACCCGCTCGTAAGGCGGGTCATA
Gut_R104_SP4	CAAGTTTTCTTCCCATGATACGTGGTCAA	Gut_R104	GTTTCTATACAGACCCGCTCGTAAGGCGGGTCATA
Gut_R104_SP5	ATCCATACCCAAACATCTTGCCGGTAATCAC	Gut_R104	GTTTCTATACAGACCCGCTCGTAAGGCGGGTCATA
Gut_R104_SP6	AGAACTTCCAGTATTTCCAAACATGCAAAA	Gut_R104	GTTTCTATACAGACCCGCTCGTAAGGCGGGTCATA
Gut_R104_SP7	CGAAAAGATTGCTGAGCTTGCGAAAAAAGC	Gut_R104	GTTTCTATACAGACCCGCTCGTAAGGCGGGTCATA
Gut_R1040_SP1	TGCTTTATTGGTTGGTCAAGGAATGGTGCTA	Gut_R1040	CGTTTATTTCAATCCACGCTCCCACGAGAGGAGCGAC
Gut_R1040_SP2	CAAGGCACAAAATTATTTAAAATGCTATT	Gut_R1040	CGTTTATTTCAATCCACGCTCCCACGAGAGGAGCGAC
Gut_R1040_SP3	CTATCCTCGTGAATTTCCCTATCCTCTT	Gut_R1040	CGTTTATTTCAATCCACGCTCCCACGAGAGGAGCGAC
Gut_R1040_SP4	ATTAATTCCGCCTATCAAGTTAGTCAGTA	Gut_R1040	CGTTTATTTCAATCCACGCTCCCACGAGAGGAGCGAC
Gut_R1040_SP5	TCAGTACCGCAATAGATTTCAAACTCAAAGC	Gut_R1040	CGTTTATTTCAATCCACGCTCCCACGAGAGGAGCGAC
Gut_R1041_SP1	ATTAATTCCGCCTATCAAGTTAGTCAGTAC	Gut_R1041	CTTTATTTCAATCCACGCTCCCACGAGAGGAGCGAC
Gut_R1041_SP2	ACCAACCAAACGACAGACGCCAAACAAAATA	Gut_R1041	CTTTATTTCAATCCACGCTCCCACGAGAGGAGCGAC
Gut_R1041_SP3	TATGACATCAGACGAGGCCGGCATGGTGG	Gut_R1041	CTTTATTTCAATCCACGCTCCCACGAGAGGAGCGAC
Gut_R1041_SP4	ACTGATGAATGGCTGTATGATGAAGAATAT	Gut_R1041	CTTTATTTCAATCCACGCTCCCACGAGAGGAGCGAC
Gut_R1041_SP5	CAAGGCACAAAATTATTTAAAATGCTATTA	Gut_R1041	CTTTATTTCAATCCACGCTCCCACGAGAGGAGCGAC
Gut_R1042_SP1	ACATTATGTTTTCCGTCATCATCACTCCAT	Gut_R1042	GTAATCCCCACGAGGGGACGGACGCTAGCCA
Gut_R1042_SP2	GAGAGTTAAGCCTAAGAGATATGTTTCAAA	Gut_R1042	GTAATCCCCACGAGGGGACGGACGCTAGCCA
Gut_R1042_SP3	AGCGTTAAAATTAAGGATCACTTTTCCTTG	Gut_R1042	GTAATCCCCACGAGGGGACGGACGCTAGCCA
Gut_R1043_SP1	TGAACAATTCAAAATCGTTTTAAAAATGATTAT	Gut_R1043	CTAGCGTCCGTCCCCTCGTGGGGATTAC
Gut_R1043_SP2	CAAGGAAAAGTGATCCTTAATTTTAACGCTCCG	Gut_R1043	CTAGCGTCCGTCCCCTCGTGGGGATTAC
Gut_R1043_SP3	TTTGAAACATATCTCTTAGGCTTAACTCTCTGG	Gut_R1043	CTAGCGTCCGTCCCCTCGTGGGGATTAC
Gut_R1044_SP1	CAGATAACAGCCCTGCTGGATCCAGCCCAGCAT	Gut_R1044	ATTTCAATCCACACCTTCCTTGCGGAAGGCGAC
Gut_R1044_SP10	CAAAAAAAGTCCTTACGATGGGATCTCCTCGAAT	Gut_R1044	ATTTCAATCCACACCTTCCTTGCGGAAGGCGAC
Gut_R1044_SP100	ACCTCTTGCCAGGAGATCACAGAAATGATATAAT	Gut_R1044	ATTTCAATCCACACCTTCCTTGCGGAAGGCGAC
Gut_R1044_SP101	GTTAGATCTCGAGGTGTCTGCACGATACACGTTC	Gut_R1044	ATTTCAATCCACACCTTCCTTGCGGAAGGCGAC
Gut_R1044_SP102	TGATTGAGGAGGTCAGGAGGATAGTAGAGTGAGA	Gut_R1044	ATTTCAATCCACACCTTCCTTGCGGAAGGCGAC
Gut_R1044_SP103	GCCAGGAGAGGCCGTCTCCTCATACATGCCGGGGAT	Gut_R1044	ATTTCAATCCACACCTTCCTTGCGGAAGGCGAC
Gut_R1044_SP104	CTATGGAACATGGGCCACCCGGATCATAAAAGAT	Gut_R1044	ATTTCAATCCACACCTTCCTTGCGGAAGGCGAC
Gut_R1044_SP105	CTGGGCGTCACCGAGCAGCTGCAAAGCATCAAT	Gut_R1044	ATTTCAATCCACACCTTCCTTGCGGAAGGCGAC
Gut_R1044_SP106	CATTCTAATTTTCGAAGTTACCGCAGGCGAAAT	Gut_R1044	ATTTCAATCCACACCTTCCTTGCGGAAGGCGAC
Gut_R1044_SP107	ACTTTGAGCAGCACGGACTTAGCGAGGACGAAGT	Gut_R1044	ATTTCAATCCACACCTTCCTTGCGGAAGGCGAC
Gut_R1044_SP108	CTCTTTCAACAGCTTCCCCTGCTCTGTCAGGTT	Gut_R1044	ATTTCAATCCACACCTTCCTTGCGGAAGGCGAC
Gut_R1044_SP109	GATAAGAAGCTGGCTGCGGAAGCACTGAAGAAGGC	Gut_R1044	ATTTCAATCCACACCTTCCTTGCGGAAGGCGAC
Gut_R1044_SP11	CAGATACATTCTGGGCTGTGTCTACTTTAAAAAT	Gut_R1044	ATTTCAATCCACACCTTCCTTGCGGAAGGCGAC
Gut_R1044_SP110	GCATCTGACCGAGGATATATTTAAGGTCGATCTT	Gut_R1044	ATTTCAATCCACACCTTCCTTGCGGAAGGCGAC
Gut_R1044_SP111	AACTCGTTAAGCTGGGTCAAGGTTCCCACAGCAAA	Gut_R1044	ATTTCAATCCACACCTTCCTTGCGGAAGGCGAC
Gut_R1044_SP112	GCCACCCGTATACCTATCAGTGGCAGTGTGAAAT	Gut_R1044	ATTTCAATCCACACCTTCCTTGCGGAAGGCGAC
Gut_R1044_SP113	TTCGAGTCCTTTAAATAATCATCTGGGAGGCGAT	Gut_R1044	ATTTCAATCCACACCTTCCTTGCGGAAGGCGAC
Gut_R1044_SP114	CATTTGAGGTGGACAGCGACGGATCAGTGATTAT	Gut_R1044	ATTTCAATCCACACCTTCCTTGCGGAAGGCGAC
Gut_R1044_SP115	AATGCATGAGTATTATAATACCATCAAGAAACT	Gut_R1044	ATTTCAATCCACACCTTCCTTGCGGAAGGCGAC
Gut_R1044_SP12	GAGCCCGGCAGGTGCGAACTGCCATGGCTCAGGT	Gut_R1044	ATTTCAATCCACACCTTCCTTGCGGAAGGCGAC
Gut_R1044_SP13	TAGTGCATCTTTGTAATTCGTCTTTAACTTCATT	Gut_R1044	ATTTCAATCCACACCTTCCTTGCGGAAGGCGAC
Gut_R1044_SP14	GATGTACGGGCATACCTTTCGTGGCGGCAGATTG	Gut_R1044	ATTTCAATCCACACCTTCCTTGCGGAAGGCGAC
Gut_R1044_SP15	CGTAACTCATTAATTGTAAGGTCGCATTCCTCGC	Gut_R1044	ATTTCAATCCACACCTTCCTTGCGGAAGGCGAC
Gut_R1044_SP16	GTACCAGATCCGGTTCCGAATCGCGTTGAGTTC	Gut_R1044	ATTTCAATCCACACCTTCCTTGCGGAAGGCGAC
Gut_R1044_SP17	GCTATGGATTTATTCGGACGCTCAGCAAAAGAATT	Gut_R1044	ATTTCAATCCACACCTTCCTTGCGGAAGGCGAC
Gut_R1044_SP18	GCTATGGGACACACCGGAGAGGCGCACCGAGGGA	Gut_R1044	ATTTCAATCCACACCTTCCTTGCGGAAGGCGAC
Gut_R1044_SP19	TAAAAAAACGCCGGCCAGAGCCAATATCGTCAAGT	Gut_R1044	ATTTCAATCCACACCTTCCTTGCGGAAGGCGAC
Gut_R1044_SP2	CCAGTAGGACAACCCCACATCACAGGAAGGGGAAC	Gut_R1044	ATTTCAATCCACACCTTCCTTGCGGAAGGCGAC
Gut_R1044_SP20	AGGATGATAAACTAAAGAGAGAACATATTGAGAG	Gut_R1044	ATTTCAATCCACACCTTCCTTGCGGAAGGCGAC
Gut_R1044_SP21	TCTCTCCGGTAATATCCATGATATCTTCTACTGT	Gut_R1044	ATTTCAATCCACACCTTCCTTGCGGAAGGCGAC
Gut_R1044_SP22	TGTAATAGGTAACATAACTGTCCTCCTTCAAAAAA	Gut_R1044	ATTTCAATCCACACCTTCCTTGCGGAAGGCGAC
Gut_R1044_SP23	GCATGGCTGCTGTTTTATAGGCTTCTCATAGTCAT	Gut_R1044	ATTTCAATCCACACCTTCCTTGCGGAAGGCGAC
Gut_R1044_SP24	TTTCCAGATCAGGCGCCGGTGAATGATATCATAT	Gut_R1044	ATTTCAATCCACACCTTCCTTGCGGAAGGCGAC
Gut_R1044_SP25	TCTTTGCGGCTTGGAGCATTGCCGACACATTCTTT	Gut_R1044	ATTTCAATCCACACCTTCCTTGCGGAAGGCGAC
Gut_R1044_SP26	GCCGGAAAAAGAGCCGGAAGCGACATTTGTATA	Gut_R1044	ATTTCAATCCACACCTTCCTTGCGGAAGGCGAC
Gut_R1044_SP27	AAGAAACTTTTTATAATCGTGATTGTTAGGATTTA	Gut_R1044	ATTTCAATCCACACCTTCCTTGCGGAAGGCGAC
Gut_R1044_SP28	TTTCTCAGGTTTTGCCCTTTGCGGTTCGATCTCAA	Gut_R1044	ATTTCAATCCACACCTTCCTTGCGGAAGGCGAC
Gut_R1044_SP29	GCTGTCCGAAAATCAACATCATCCATCATCTCGAC	Gut_R1044	ATTTCAATCCACACCTTCCTTGCGGAAGGCGAC
Gut_R1044_SP3	CTGCCTCCATGTCCGGTACAAAACTCGATTTCAT	Gut_R1044	ATTTCAATCCACACCTTCCTTGCGGAAGGCGAC
Gut_R1044_SP30	ATACCACCTGACTTACTGCTAAGCTGCAGCGAC	Gut_R1044	ATTTCAATCCACACCTTCCTTGCGGAAGGCGAC
Gut_R1044_SP31	TACATTAATTCTCCCTCTTTTTATTCATTTTTATT	Gut_R1044	ATTTCAATCCACACCTTCCTTGCGGAAGGCGAC
Gut_R1044_SP32	AGGAGACTACCTGCGGAAGGGTGTCGACGTGGCA	Gut_R1044	ATTTCAATCCACACCTTCCTTGCGGAAGGCGAC
Gut_R1044_SP33	GGCTTATATGGAAATGGTCCGCCCCATCGGAGC	Gut_R1044	ATTTCAATCCACACCTTCCTTGCGGAAGGCGAC
Gut_R1044_SP34	ACTCATATCAAAATCCTCCTCTACTTAATAAATAC	Gut_R1044	ATTTCAATCCACACCTTCCTTGCGGAAGGCGAC
Gut_R1044_SP35	CAAAGCCGGTATGACCGGATATGGAATTGAGCAT	Gut_R1044	ATTTCAATCCACACCTTCCTTGCGGAAGGCGAC
Gut_R1044_SP36	GCGCAAAAGAGGACGGAATATTCATTCTTCTGGC	Gut_R1044	ATTTCAATCCACACCTTCCTTGCGGAAGGCGAC
Gut_R1044_SP37	AGAGTCCGCAGGCGCTGACCAACGATTTTGCGAA	Gut_R1044	ATTTCAATCCACACCTTCCTTGCGGAAGGCGAC
Gut_R1044_SP38	TTAGCCTGGTAAGAAATCATAACAATTTGAGAGTG	Gut_R1044	ATTTCAATCCACACCTTCCTTGCGGAAGGCGAC
Gut_R1044_SP39	AACTGGTAGATGAGTATTTCTTACTTCGAGAGGA	Gut_R1044	ATTTCAATCCACACCTTCCTTGCGGAAGGCGAC
Gut_R1044_SP4	TAATAACCTGTTTCTCTCCGCCCATGAATTTCAT	Gut_R1044	ATTTCAATCCACACCTTCCTTGCGGAAGGCGAC
Gut_R1044_SP40	GGCTGATTTATAGAACGATATTCCGGGATATCTT	Gut_R1044	ATTTCAATCCACACCTTCCTTGCGGAAGGCGAC
Gut_R1044_SP41	TTTAAGCCACTTTTTGCGTGTGTTACTTCCTATT	Gut_R1044	ATTTCAATCCACACCTTCCTTGCGGAAGGCGAC
Gut_R1044_SP42	CGTATAATACCATTTCAAACACATATCAACTTTAAGC	Gut_R1044	ATTTCAATCCACACCTTCCTTGCGGAAGGCGAC
Gut_R1044_SP43	GCCATACGTCCTTTCACCTTTCTAGTATTGATCAT	Gut_R1044	ATTTCAATCCACACCTTCCTTGCGGAAGGCGAC
Gut_R1044_SP44	TTTGTAATCTTCCCGCACTCATCCATGTAAGAAT	Gut_R1044	ATTTCAATCCACACCTTCCTTGCGGAAGGCGAC
Gut_R1044_SP45	AGTATCTGAGAATGCGTCTGGCTGAGATACGTGAC	Gut_R1044	ATTTCAATCCACACCTTCCTTGCGGAAGGCGAC
Gut_R1044_SP46	TTGCCTGAGTATATTATAACCAACTCAGGCAGGT	Gut_R1044	ATTTCAATCCACACCTTCCTTGCGGAAGGCGAC
Gut_R1044_SP47	AAGAAGCCATGTACAAAGCGGGAGAGATGCAGGT	Gut_R1044	ATTTCAATCCACACCTTCCTTGCGGAAGGCGAC
Gut_R1044_SP48	GAAATCATATCCCAGCTTTTTCATGGCGGCTAT	Gut_R1044	ATTTCAATCCACACCTTCCTTGCGGAAGGCGAC
Gut_R1044_SP49	GGCAGCAAAAAAATCGGTTATAGCATAAAAGATAA	Gut_R1044	ATTTCAATCCACACCTTCCTTGCGGAAGGCGAC
Gut_R1044_SP5	AATGCAAGTCATATGAAATCATGTAAATGTACAT	Gut_R1044	ATTTCAATCCACACCTTCCTTGCGGAAGGCGAC
Gut_R1044_SP50	CATCCACAATTACCCGGCGTCCCTGGTAGGTATC	Gut_R1044	ATTTCAATCCACACCTTCCTTGCGGAAGGCGAC
Gut_R1044_SP51	CTATGGTCTTCTGCAGGTCGCGGCGCGTCTGATT	Gut_R1044	ATTTCAATCCACACCTTCCTTGCGGAAGGCGAC
Gut_R1044_SP52	GGGTATTTCCGTGAGTATGTAACCATCAAGGAGC	Gut_R1044	ATTTCAATCCACACCTTCCTTGCGGAAGGCGAC
Gut_R1044_SP53	CTTTGATAGTGCTCTCTCCGCTTCTTCTCTGTTT	Gut_R1044	ATTTCAATCCACACCTTCCTTGCGGAAGGCGAC
Gut_R1044_SP54	TGTTCAGATGGATTATTTCTTCCTGATTCTAAT	Gut_R1044	ATTTCAATCCACACCTTCCTTGCGGAAGGCGAC
Gut_R1044_SP55	GGAATCAGCCTGTATGATCTGGCCGTTGATGTGCT	Gut_R1044	ATTTCAATCCACACCTTCCTTGCGGAAGGCGAC
Gut_R1044_SP56	GGAGATTCCGGAAATACCTGATATCTTTGGCGA	Gut_R1044	ATTTCAATCCACACCTTCCTTGCGGAAGGCGAC
Gut_R1044_SP57	CATTGGAGTGTCTTGAGTTGGCTTGTAATGAAGT	Gut_R1044	ATTTCAATCCACACCTTCCTTGCGGAAGGCGAC
Gut_R1044_SP58	GACTGCTCCATATGGTTATAAGAAAGTTAAGCAT	Gut_R1044	ATTTCAATCCACACCTTCCTTGCGGAAGGCGAC
Gut_R1044_SP59	GGATTCGTCACCGGATACCTTAAAAACAGTTCC	Gut_R1044	ATTTCAATCCACACCTTCCTTGCGGAAGGCGAC
Gut_R1044_SP6	CCATACGTCCTTTCACCTTTCTAGTATTGATCAT	Gut_R1044	ATTTCAATCCACACCTTCCTTGCGGAAGGCGAC
Gut_R1044_SP60	CGCGACTGGTAAGGCAATCGGCCTCCCGCAGGAT	Gut_R1044	ATTTCAATCCACACCTTCCTTGCGGAAGGCGAC
Gut_R1044_SP61	GGTTGCAGAAGGAACCTGGACGAAGGAGGCTGC	Gut_R1044	ATTTCAATCCACACCTTCCTTGCGGAAGGCGAC
Gut_R1044_SP62	TATCGGGAACTTTGGCCGTCACCACGAACTTATC	Gut_R1044	ATTTCAATCCACACCTTCCTTGCGGAAGGCGAC
Gut_R1044_SP63	GAAGAGGCGTGCAGACTTATCTACAGTAATATAC	Gut_R1044	ATTTCAATCCACACCTTCCTTGCGGAAGGCGAC
Gut_R1044_SP64	TCTTCGAAAGGCCAGCCTTCTTCAGATTATTGAT	Gut_R1044	ATTTCAATCCACACCTTCCTTGCGGAAGGCGAC
Gut_R1044_SP65	CTTCCACGCATTCTGGTTTCCGGCGGTCCCCTGT	Gut_R1044	ATTTCAATCCACACCTTCCTTGCGGAAGGCGAC
Gut_R1044_SP66	GTGGGGAAATTTTTCTCATTATTTCCGAAGATT	Gut_R1044	ATTTCAATCCACACCTTCCTTGCGGAAGGCGAC
Gut_R1044_SP67	AACCAAGCTCAGACATTTTCATCTTTACACAATAT	Gut_R1044	ATTTCAATCCACACCTTCCTTGCGGAAGGCGAC
Gut_R1044_SP68	CTTTAACTTCACTAAATAACGCCTCCATTCAATGT	Gut_R1044	ATTTCAATCCACACCTTCCTTGCGGAAGGCGAC
Gut_R1044_SP69	AAAAGAAATTGATAACGATATAGCGGAAGTAAT	Gut_R1044	ATTTCAATCCACACCTTCCTTGCGGAAGGCGAC
Gut_R1044_SP7	CATGTAATCACAGCGCATGGACGCCTCGCGGAT	Gut_R1044	ATTTCAATCCACACCTTCCTTGCGGAAGGCGAC
Gut_R1044_SP70	CCTCAGCCGTTTTCTCACGGAGGCTATATGTTGT	Gut_R1044	ATTTCAATCCACACCTTCCTTGCGGAAGGCGAC
Gut_R1044_SP71	TGTAACAGAACCAGCCGTTCTTCTTGAGAAAGCT	Gut_R1044	ATTTCAATCCACACCTTCCTTGCGGAAGGCGAC
Gut_R1044_SP72	AATCATTATTGAATTTTTGCTATTGCATCAGTT	Gut_R1044	ATTTCAATCCACACCTTCCTTGCGGAAGGCGAC
Gut_R1044_SP73	TACCCCGTGACCATATTCCCGGCATCGTCCACAT	Gut_R1044	ATTTCAATCCACACCTTCCTTGCGGAAGGCGAC
Gut_R1044_SP74	TTGATATTCCCGTCCTGCCCCATCACCTGGCCT	Gut_R1044	ATTTCAATCCACACCTTCCTTGCGGAAGGCGAC
Gut_R1044_SP75	GCCGATCTGGAGGAGGAACAAACATGGCATTTAGC	Gut_R1044	ATTTCAATCCACACCTTCCTTGCGGAAGGCGAC
Gut_R1044_SP76	TTAAAGCAGGATACGCAACTCGTGCAATATTTTTT	Gut_R1044	ATTTCAATCCACACCTTCCTTGCGGAAGGCGAC
Gut_R1044_SP77	CAGAACTAATGACTCATCAAGCAAGAGTCAAAGC	Gut_R1044	ATTTCAATCCACACCTTCCTTGCGGAAGGCGAC
Gut_R1044_SP78	TATTTATACTGGAAAGGCCGCAATTAATGAAATTAG	Gut_R1044	ATTTCAATCCACACCTTCCTTGCGGAAGGCGAC
Gut_R1044_SP79	ACAGAGCGTCAGCAATGGCAGATCGAACGGGAT	Gut_R1044	ATTTCAATCCACACCTTCCTTGCGGAAGGCGAC
Gut_R1044_SP8	TTCTACAATAAAAAGATACGAAGATGGAGACAT	Gut_R1044	ATTTCAATCCACACCTTCCTTGCGGAAGGCGAC
Gut_R1044_SP80	ACGCGTAAGCTTCATTTTCATAACGCTTAGTAAT	Gut_R1044	ATTTCAATCCACACCTTCCTTGCGGAAGGCGAC
Gut_R1044_SP81	GTCACCGGGAAAGGACAGCAGTATTTTATCAAT	Gut_R1044	ATTTCAATCCACACCTTCCTTGCGGAAGGCGAC
Gut_R1044_SP82	GCTATAATGGCTCTCAAGAAATACGCACTGTCTAAC	Gut_R1044	ATTTCAATCCACACCTTCCTTGCGGAAGGCGAC
Gut_R1044_SP83	AAAGGAGAGTTACCGAATGGCAACTAATACGAC	Gut_R1044	ATTTCAATCCACACCTTCCTTGCGGAAGGCGAC
Gut_R1044_SP84	TTTCTTTTTGCTCTATCTCTTGCTGTTCCGTAGC	Gut_R1044	ATTTCAATCCACACCTTCCTTGCGGAAGGCGAC
Gut_R1044_SP85	TCACATATATGACCTTATCACCGCTGGATGTGTG	Gut_R1044	ATTTCAATCCACACCTTCCTTGCGGAAGGCGAC
Gut_R1044_SP86	GCCGCCAGGAGTTGCACCGGGTGATGGATAATGGA	Gut_R1044	ATTTCAATCCACACCTTCCTTGCGGAAGGCGAC
Gut_R1044_SP87	GCCGGTATTGCAACCGTCACATCTAAACAATAAC	Gut_R1044	ATTTCAATCCACACCTTCCTTGCGGAAGGCGAC
Gut_R1044_SP88	ACAGCACAGAGCAATGGTGTATACATGAAATGT	Gut_R1044	ATTTCAATCCACACCTTCCTTGCGGAAGGCGAC
Gut_R1044_SP89	GTATCGGGCAAGCGTATCCGAAGCTGATCCCAC	Gut_R1044	ATTTCAATCCACACCTTCCTTGCGGAAGGCGAC
Gut_R1044_SP9	AAAAAAAGTCCTTACGATGGGATCTCCTCGAAT	Gut_R1044	ATTTCAATCCACACCTTCCTTGCGGAAGGCGAC
Gut_R1044_SP90	GTATAAGGGATTTTATGGAGGAAATCAAGATGGT	Gut_R1044	ATTTCAATCCACACCTTCCTTGCGGAAGGCGAC
Gut_R1044_SP91	ACTATCAAACGGTAGTGGCCTTTGTTCAAGGAC	Gut_R1044	ATTTCAATCCACACCTTCCTTGCGGAAGGCGAC
Gut_R1044_SP92	CTGACAGCTTTGTCACATGGGGGTATGATTTGC	Gut_R1044	ATTTCAATCCACACCTTCCTTGCGGAAGGCGAC
Gut_R1044_SP93	CAGAATGCGAAGGAAGATAAGCCTAAGCGTTTT	Gut_R1044	ATTTCAATCCACACCTTCCTTGCGGAAGGCGAC
Gut_R1044_SP94	CATGACCTTCAGGTCCACAATGGCCTTACCAGGC	Gut_R1044	ATTTCAATCCACACCTTCCTTGCGGAAGGCGAC
Gut_R1044_SP95	GAAGCATCGGATAAGAGACCGGCAATTACAAAT	Gut_R1044	ATTTCAATCCACACCTTCCTTGCGGAAGGCGAC
Gut_R1044_SP96	GAAGAGATTGAAGAACTGGACCGGGTCATCGAAGA	Gut_R1044	ATTTCAATCCACACCTTCCTTGCGGAAGGCGAC
Gut_R1044_SP97	AATTATAAAGCAGAAGAGCCGGGAGGACAATCTT	Gut_R1044	ATTTCAATCCACACCTTCCTTGCGGAAGGCGAC
Gut_R1044_SP98	CAGGAAGCGGGAAGGCCGCTGGGGACCATCACAAC	Gut_R1044	ATTTCAATCCACACCTTCCTTGCGGAAGGCGAC
Gut_R1044_SP99	AGTGTCAGCATCATACACCACCTACTCTCTTAT	Gut_R1044	ATTTCAATCCACACCTTCCTTGCGGAAGGCGAC
Gut_R1045_SP1	CGGAAGAGGGCATTTCCAGATGCTATTCGTATCT	Gut_R1045	ATTTCAATCCACACCTTCCTTGCGGAAGGTGAC
Gut_R1045_SP10	CTCGTTTCCGAAGCTGTTCCATCTCCCTTCTGAA	Gut_R1045	ATTTCAATCCACACCTTCCTTGCGGAAGGTGAC
Gut_R1045_SP11	TCAAGGCCGTCTACTGAGTTGCTATACAGGGGCTGT	Gut_R1045	ATTTCAATCCACACCTTCCTTGCGGAAGGTGAC
Gut_R1045_SP12	GGTAGCTTTGTATGTCATCGGCTAAGTTGCTTTGT	Gut_R1045	ATTTCAATCCACACCTTCCTTGCGGAAGGTGAC
Gut_R1045_SP13	GATAAATCTAATCGAGCTAATCAAAAATTTTGCC	Gut_R1045	ATTTCAATCCACACCTTCCTTGCGGAAGGTGAC
Gut_R1045_SP14	TTTTCTTTTGTGTACTCGGATGCTGCTGTCGAG	Gut_R1045	ATTTCAATCCACACCTTCCTTGCGGAAGGTGAC
Gut_R1045_SP15	GGAGCAGGACCTCCGCCCCAGAATCCCAGACCA	Gut_R1045	ATTTCAATCCACACCTTCCTTGCGGAAGGTGAC
Gut_R1045_SP16	TGTAAGCGGTATGCCAGGCGGCTTCGCCTACGTTT	Gut_R1045	ATTTCAATCCACACCTTCCTTGCGGAAGGTGAC
Gut_R1045_SP17	TCAGTCGCAGTTGGGCGGTATCGTTGTAACACCC	Gut_R1045	ATTTCAATCCACACCTTCCTTGCGGAAGGTGAC
Gut_R1045_SP18	TTTTGTTGTCGGCTATGGCAATAAGCGCAAGTG	Gut_R1045	ATTTCAATCCACACCTTCCTTGCGGAAGGTGAC
Gut_R1045_SP19	GATCTGGCCGTATTGACCGTCGTTGTCGTGATTGTAC	Gut_R1045	ATTTCAATCCACACCTTCCTTGCGGAAGGTGAC
Gut_R1045_SP2	GCAAAAATCATATGTACTGTCTGCATCATATCCT	Gut_R1045	ATTTCAATCCACACCTTCCTTGCGGAAGGTGAC
Gut_R1045_SP20	TGGCGAAGATGAAGAAGATACGGAAGCGCTAAGG	Gut_R1045	ATTTCAATCCACACCTTCCTTGCGGAAGGTGAC
Gut_R1045_SP21	AGGGGATGATGAAGTGTATCTGATGGACTACATG	Gut_R1045	ATTTCAATCCACACCTTCCTTGCGGAAGGTGAC
Gut_R1045_SP22	CGCGAGCCGATCTGACTTGCACGCCCTGTCCATATAGC	Gut_R1045	ATTTCAATCCACACCTTCCTTGCGGAAGGTGAC
Gut_R1045_SP23	TACAGGATTGATTCTAATACATAATTATCATACTG	Gut_R1045	ATTTCAATCCACACCTTCCTTGCGGAAGGTGAC
Gut_R1045_SP24	ATTACAGATATTAAACAGTCAATTTCCAATATT	Gut_R1045	ATTTCAATCCACACCTTCCTTGCGGAAGGTGAC
Gut_R1045_SP25	TCGCAAGTAAAAACCTTCGACAAATTTCGACAAG	Gut_R1045	ATTTCAATCCACACCTTCCTTGCGGAAGGTGAC
Gut_R1045_SP26	CAGGTTGATCTCAGTTACAATCCACATGCCATAT	Gut_R1045	ATTTCAATCCACACCTTCCTTGCGGAAGGTGAC
Gut_R1045_SP27	AAGGCTGCCTTTTGCGATTCTGTGCATGATACACT	Gut_R1045	ATTTCAATCCACACCTTCCTTGCGGAAGGTGAC
Gut_R1045_SP28	ATGATACCGGGATGGGAAAGTACTATGGAGTCAC	Gut_R1045	ATTTCAATCCACACCTTCCTTGCGGAAGGTGAC
Gut_R1045_SP29	CAAGAAAAGATCGAGAAACAAGAGATAAGTTTTT	Gut_R1045	ATTTCAATCCACACCTTCCTTGCGGAAGGTGAC
Gut_R1045_SP3	CAGGCGGAGATGGTAGCACCTATTATGTCACACCA	Gut_R1045	ATTTCAATCCACACCTTCCTTGCGGAAGGTGAC
Gut_R1045_SP30	AATTTTAACGTCTTTTCTTCTTCTAACGATAGTT	Gut_R1045	ATTTCAATCCACACCTTCCTTGCGGAAGGTGAC
Gut_R1045_SP31	GTAAAGACTTTTGCAGACTTCGAGGCTCAGATGTC	Gut_R1045	ATTTCAATCCACACCTTCCTTGCGGAAGGTGAC
Gut_R1045_SP32	TCTTCCAGACGAGCTGCTAAGCATCAGCCCTAACA	Gut_R1045	ATTTCAATCCACACCTTCCTTGCGGAAGGTGAC
Gut_R1045_SP33	AAGAGGCAACTGAAAATAAAACATACAAAACATG	Gut_R1045	ATTTCAATCCACACCTTCCTTGCGGAAGGTGAC
Gut_R1045_SP34	GGAAGATGCGATCCTGTTCAACTTGTACTCGTTGG	Gut_R1045	ATTTCAATCCACACCTTCCTTGCGGAAGGTGAC
Gut_R1045_SP35	CCCGTCAACATTCATTTTCAGTGCATCACGGACC	Gut_R1045	ATTTCAATCCACACCTTCCTTGCGGAAGGTGAC
Gut_R1045_SP36	CTGCAAGACGAATGATATTTAATATCTGTTCCAAG	Gut_R1045	ATTTCAATCCACACCTTCCTTGCGGAAGGTGAC
Gut_R1045_SP37	AGAACAGGGGGGACGGACTGATGAGGCGAATGC	Gut_R1045	ATTTCAATCCACACCTTCCTTGCGGAAGGTGAC
Gut_R1045_SP38	GGTACAGCCGTTTCCAAACAGGGCATGTGCATTAG	Gut_R1045	ATTTCAATCCACACCTTCCTTGCGGAAGGTGAC
Gut_R1045_SP39	ATGCGTCCGGTACGATTGGCATCACGCTTCCAG	Gut_R1045	ATTTCAATCCACACCTTCCTTGCGGAAGGTGAC
Gut_R1045_SP4	GCTAAAGTACAATTTATTGTAAAAATGACATTTT	Gut_R1045	ATTTCAATCCACACCTTCCTTGCGGAAGGTGAC
Gut_R1045_SP40	AAGAATATGCAACTTTTTCGATGACTCCGCAACTC	Gut_R1045	ATTTCAATCCACACCTTCCTTGCGGAAGGTGAC
Gut_R1045_SP41	GCTTTTCAACGGCAAAAAGTCAAGGAAAAATATAAC	Gut_R1045	ATTTCAATCCACACCTTCCTTGCGGAAGGTGAC
Gut_R1045_SP42	TTTCTTCAGCAAGATAACCACAGGCAGCACATT	Gut_R1045	ATTTCAATCCACACCTTCCTTGCGGAAGGTGAC
Gut_R1045_SP43	GCAAGACGTGGACGATGTGGCAGACTGAGCAGCT	Gut_R1045	ATTTCAATCCACACCTTCCTTGCGGAAGGTGAC
Gut_R1045_SP44	CCAACTGCAAAAGATACTTGTTAAGCTCCACCA	Gut_R1045	ATTTCAATCCACACCTTCCTTGCGGAAGGTGAC
Gut_R1045_SP45	CATCTTCGCTTTCGTCTCTTTACTCGTCCAAAAAGT	Gut_R1045	ATTTCAATCCACACCTTCCTTGCGGAAGGTGAC
Gut_R1045_SP46	AGGAGTATCATCGTATCGATGCAACGCATCTGGC	Gut_R1045	ATTTCAATCCACACCTTCCTTGCGGAAGGTGAC
Gut_R1045_SP47	TAATCAGACTGGCGAGTTAAGCAAAACACGCGAA	Gut_R1045	ATTTCAATCCACACCTTCCTTGCGGAAGGTGAC
Gut_R1045_SP48	CAGCAACGATTATGGCACATACAGTAGATTGTTT	Gut_R1045	ATTTCAATCCACACCTTCCTTGCGGAAGGTGAC
Gut_R1045_SP49	GTTTGGCGAATTGTATATTCAACTGAGCTATAAAA	Gut_R1045	ATTTCAATCCACACCTTCCTTGCGGAAGGTGAC
Gut_R1045_SP5	TTCAACTTCGCCCACAAAGCACATACCTTTTGTA	Gut_R1045	ATTTCAATCCACACCTTCCTTGCGGAAGGTGAC
Gut_R1045_SP50	TTGCAATACCAAAAAAAGAAAGCAAACAAAAAGGA	Gut_R1045	ATTTCAATCCACACCTTCCTTGCGGAAGGTGAC
Gut_R1045_SP51	GTCTGCTCCCGATCTGACCGCCCGATATTTCCA	Gut_R1045	ATTTCAATCCACACCTTCCTTGCGGAAGGTGAC
Gut_R1045_SP52	ACCTTCCTCCAAATCCATCAGCTCACGCGGATTCAG	Gut_R1045	ATTTCAATCCACACCTTCCTTGCGGAAGGTGAC
Gut_R1045_SP53	CATGGAGTCTATGAGTATGGATACAGATACATA	Gut_R1045	ATTTCAATCCACACCTTCCTTGCGGAAGGTGAC
Gut_R1045_SP54	GTGAGAAGAGCTGCACAGGCGGTAGTTGATCGCGT	Gut_R1045	ATTTCAATCCACACCTTCCTTGCGGAAGGTGAC
Gut_R1045_SP55	GTGTCCAATAACTCTATATACGTTGTTCTGTCT	Gut_R1045	ATTTCAATCCACACCTTCCTTGCGGAAGGTGAC
Gut_R1045_SP56	GATGTGCAGTATCAGATTACAGAATTAACAAAG	Gut_R1045	ATTTCAATCCACACCTTCCTTGCGGAAGGTGAC
Gut_R1045_SP57	CTTTAGCGCTGCTTTCACGCCGATATCTCCTACCA	Gut_R1045	ATTTCAATCCACACCTTCCTTGCGGAAGGTGAC
Gut_R1045_SP58	CAGAGATATGATTGATAACAGTGATCTGAGCCA	Gut_R1045	ATTTCAATCCACACCTTCCTTGCGGAAGGTGAC
Gut_R1045_SP59	TCATGTGGCAGCAGGCGAGGGAGCAGGCCACGGA	Gut_R1045	ATTTCAATCCACACCTTCCTTGCGGAAGGTGAC
Gut_R1045_SP6	TGCCCAAAACTGAGCCAACAAGAGTTACAGTCGAT	Gut_R1045	ATTTCAATCCACACCTTCCTTGCGGAAGGTGAC
Gut_R1045_SP60	GTAGTATCTGTCCGATGCGCCGGCGCAATGGTG	Gut_R1045	ATTTCAATCCACACCTTCCTTGCGGAAGGTGAC
Gut_R1045_SP61	AACAAGCTTGCAGTTGCACGTTACACATTAGCCGT	Gut_R1045	ATTTCAATCCACACCTTCCTTGCGGAAGGTGAC
Gut_R1045_SP62	GGAAGCAGGATGTCGGTGTGGAGAGCTATACCGAA	Gut_R1045	ATTTCAATCCACACCTTCCTTGCGGAAGGTGAC
Gut_R1045_SP63	AATCCGGACGGCATCTGCGGATAAGTTAAGGAG	Gut_R1045	ATTTCAATCCACACCTTCCTTGCGGAAGGTGAC
Gut_R1045_SP64	CTTCTTGTGTTAATCCACTTTCTTTTCTTATAG	Gut_R1045	ATTTCAATCCACACCTTCCTTGCGGAAGGTGAC
Gut_R1045_SP65	TACGGGTTCCGCAACTTTTGAAGCAGCGGTAAATG	Gut_R1045	ATTTCAATCCACACCTTCCTTGCGGAAGGTGAC
Gut_R1045_SP66	GTTTTACCGCTTAATACCTCGCCCTGTTTGTACTT	Gut_R1045	ATTTCAATCCACACCTTCCTTGCGGAAGGTGAC
Gut_R1045_SP67	TGGATTCAAGCTAGCAATGTACCACGACTTTACA	Gut_R1045	ATTTCAATCCACACCTTCCTTGCGGAAGGTGAC
Gut_R1045_SP68	GAGTCAATCCCCAACCAAAAAGCCGAGGAATTTA	Gut_R1045	ATTTCAATCCACACCTTCCTTGCGGAAGGTGAC
Gut_R1045_SP69	AAAGTATTCAAACGGAAACGGACAACCAGACAAA	Gut_R1045	ATTTCAATCCACACCTTCCTTGCGGAAGGTGAC
Gut_R1045_SP7	GGAGGTCTTGCAGGAAAAGGGAATTGAGTTAATT	Gut_R1045	ATTTCAATCCACACCTTCCTTGCGGAAGGTGAC
Gut_R1045_SP70	GAAAGGATATGTTGCAAATCCAGCCTTTTTTAA	Gut_R1045	ATTTCAATCCACACCTTCCTTGCGGAAGGTGAC
Gut_R1045_SP71	CTATTTCTGTATAAGTACTCCATTTATCGCTTT	Gut_R1045	ATTTCAATCCACACCTTCCTTGCGGAAGGTGAC
Gut_R1045_SP72	CTTGATCGCGTCTACCTCAGCGTGTGCTAACTCAA	Gut_R1045	ATTTCAATCCACACCTTCCTTGCGGAAGGTGAC
Gut_R1045_SP73	TATGTCCCTTGATGAGTGCAGGAATATTTTTCT	Gut_R1045	ATTTCAATCCACACCTTCCTTGCGGAAGGTGAC
Gut_R1045_SP74	GTTACGTAGCATAGATTTTAGGTTCACCATGTTGC	Gut_R1045	ATTTCAATCCACACCTTCCTTGCGGAAGGTGAC
Gut_R1045_SP75	TCTTTGATCTCCTCAAGGGTCGTCAAATGTCACC	Gut_R1045	ATTTCAATCCACACCTTCCTTGCGGAAGGTGAC
Gut_R1045_SP76	GCTTATCCGTAAAAAGTGTAGAAGCTTGTCGCAA	Gut_R1045	ATTTCAATCCACACCTTCCTTGCGGAAGGTGAC
Gut_R1045_SP8	GGCATCTTGCGATAGATGGCGGCGTAACGTATTT	Gut_R1045	ATTTCAATCCACACCTTCCTTGCGGAAGGTGAC
Gut_R1045_SP9	GAAAAAAACTCGCAAACGGCAACTGCCGTTTCT	Gut_R1045	ATTTCAATCCACACCTTCCTTGCGGAAGGTGAC
Gut_R1046_SP1	ATCTCTTCGCCGTCTTCGAACCAATCGATA	Gut_R1046	ATAGGATCATCCCCGCTCATGCGGGTAAAAC
Gut_R1046_SP10	TTTTCCGTACCTTACTTCGAGTTGGCACAG	Gut_R1046	ATAGGATCATCCCCGCTCATGCGGGTAAAAC
Gut_R1046_SP11	AGAGAATTTACCACCTGTGCTTCCTCAAGT	Gut_R1046	ATAGGATCATCCCCGCTCATGCGGGTAAAAC
Gut_R1046_SP12	GATGAAAAGGCGGGTAATTGATACCGACCT	Gut_R1046	ATAGGATCATCCCCGCTCATGCGGGTAAAAC
Gut_R1046_SP13	AAGACGATAGATTTTTAGAAGAATATCAAA	Gut_R1046	ATAGGATCATCCCCGCTCATGCGGGTAAAAC
Gut_R1046_SP14	GAGATGGGAAAAAGGGAACCAGATTATGTC	Gut_R1046	ATAGGATCATCCCCGCTCATGCGGGTAAAAC
Gut_R1046_SP15	GTGATAGTGGAGATGTTATTGGCTACTATG	Gut_R1046	ATAGGATCATCCCCGCTCATGCGGGTAAAAC
Gut_R1046_SP16	TCTTACTTTGGCCATAACTACTGCTGGGTT	Gut_R1046	ATAGGATCATCCCCGCTCATGCGGGTAAAAC
Gut_R1046_SP17	ACAAAGCCACCAACAGCTTTTTTATAAAGA	Gut_R1046	ATAGGATCATCCCCGCTCATGCGGGTAAAAC
Gut_R1046_SP18	CTACTGACCCGCCAACTGAATTTAGTAGTG	Gut_R1046	ATAGGATCATCCCCGCTCATGCGGGTAAAAC
Gut_R1046_SP19	CTTAAACTTCTTAACTTTCTAGCGATTTTT	Gut_R1046	ATAGGATCATCCCCGCTCATGCGGGTAAAAC
Gut_R1046_SP2	GCTTATTAGCACTTGGAATAGACTTGTCGG	Gut_R1046	ATAGGATCATCCCCGCTCATGCGGGTAAAAC
Gut_R1046_SP20	GACTAATAATGAGTCGGAAGGTTACTGGTA	Gut_R1046	ATAGGATCATCCCCGCTCATGCGGGTAAAAC
Gut_R1046_SP21	ATCTGACTCTGTAGTTCTTAAATTAGGGCG	Gut_R1046	ATAGGATCATCCCCGCTCATGCGGGTAAAAC
Gut_R1046_SP22	GAGGAGTTTTCAAAGACTACAGAGTCTAGG	Gut_R1046	ATAGGATCATCCCCGCTCATGCGGGTAAAAC
Gut_R1046_SP23	TCAGGATTAAGCCTGATGGTGGTCATAAGT	Gut_R1046	ATAGGATCATCCCCGCTCATGCGGGTAAAAC
Gut_R1046_SP24	CTGCGCCCTTGATCTCTTCTGCCATTGAAG	Gut_R1046	ATAGGATCATCCCCGCTCATGCGGGTAAAAC
Gut_R1046_SP25	CAGTCAAATAATCCAATGGATGTTGCTAGTG	Gut_R1046	ATAGGATCATCCCCGCTCATGCGGGTAAAAC
Gut_R1046_SP26	AGACGGTATCGCCTACACCAGGAGTGGCCG	Gut_R1046	ATAGGATCATCCCCGCTCATGCGGGTAAAAC
Gut_R1046_SP27	ATTTAACAGATTTACCGATAGATGATATCC	Gut_R1046	ATAGGATCATCCCCGCTCATGCGGGTAAAAC
Gut_R1046_SP28	TCCATTGACTAATTGTTGCCGGCTTTACTT	Gut_R1046	ATAGGATCATCCCCGCTCATGCGGGTAAAAC
Gut_R1046_SP29	TTGATTTTCATATCAAGGATAAGGATTTGC	Gut_R1046	ATAGGATCATCCCCGCTCATGCGGGTAAAAC
Gut_R1046_SP3	AGGGTAGTTCTAAGCTTTGAAATAAATTTG	Gut_R1046	ATAGGATCATCCCCGCTCATGCGGGTAAAAC
Gut_R1046_SP4	TATTTGCTTTTCAATATCTTCATTAAAATA	Gut_R1046	ATAGGATCATCCCCGCTCATGCGGGTAAAAC
Gut_R1046_SP5	CACAATATCTATACTAAGATATATTTGCCT	Gut_R1046	ATAGGATCATCCCCGCTCATGCGGGTAAAAC
Gut_R1046_SP6	CCGCAACTTATACCGTCAAACAAGCTTAAA	Gut_R1046	ATAGGATCATCCCCGCTCATGCGGGTAAAAC
Gut_R1046_SP7	TTTAATATTTCTTGCCATTCTGTAGACGAA	Gut_R1046	ATAGGATCATCCCCGCTCATGCGGGTAAAAC
Gut_R1046_SP8	AGATGAGGGGCTTTTTTGCTTATAACTTTG	Gut_R1046	ATAGGATCATCCCCGCTCATGCGGGTAAAAC
Gut_R1046_SP9	TGGAAAAGGTAAAAGATATGTCTGAAAAGG	Gut_R1046	ATAGGATCATCCCCGCTCATGCGGGTAAAAC
Gut_R1047_SP1	ATGCCAAGGAGAAAATCAAAAAAGATTTGGA	Gut_R1047	GTTTTACCCGCATGCGCGGGGATGATCCTA
Gut_R1047_SP10	GCAAGAAAAAAATTGCCAAATCTAGATAACC	Gut_R1047	GTTTTACCCGCATGCGCGGGGATGATCCTA
Gut_R1047_SP11	AGCTGGTTCTTAAAAATATTACTAGGGGCCT	Gut_R1047	GTTTTACCCGCATGCGCGGGGATGATCCTA
Gut_R1047_SP12	TTTTTTCATATTTTCTCCTTCCTTATTGTAT	Gut_R1047	GTTTTACCCGCATGCGCGGGGATGATCCTA
Gut_R1047_SP13	ACGTTGGGTGGACTGCTACCACCGAAAATTA	Gut_R1047	GTTTTACCCGCATGCGCGGGGATGATCCTA
Gut_R1047_SP14	ACTTTCTCCTGGCATTTTTGTCATTCATCT	Gut_R1047	GTTTTACCCGCATGCGCGGGGATGATCCTA
Gut_R1047_SP15	TATATTCGTTGCGTAAGGTGCGGAAAGATAA	Gut_R1047	GTTTTACCCGCATGCGCGGGGATGATCCTA
Gut_R1047_SP16	TTAGCTTCGATATGTCTTTTTCCGTATTTTA	Gut_R1047	GTTTTACCCGCATGCGCGGGGATGATCCTA
Gut_R1047_SP17	TCAAATTATCAGTCATATAATCGAATCTAGC	Gut_R1047	GTTTTACCCGCATGCGCGGGGATGATCCTA
Gut_R1047_SP18	CGTGTAGCTTAGTCTCTGATTGTTCAGGAAC	Gut_R1047	GTTTTACCCGCATGCGCGGGGATGATCCTA
Gut_R1047_SP19	ACGATGAGGGCATCGGCGATTTTGAAAGGGT	Gut_R1047	GTTTTACCCGCATGCGCGGGGATGATCCTA
Gut_R1047_SP2	TAGCAAGTCTTATAGCTTGTTCCCTGTAATA	Gut_R1047	GTTTTACCCGCATGCGCGGGGATGATCCTA
Gut_R1047_SP20	ATATTTCCAAGTTAAATTTGGTGGATGTTGC	Gut_R1047	GTTTTACCCGCATGCGCGGGGATGATCCTA
Gut_R1047_SP21	TCCAACATCACCAATAGAATTTAATTTTTCA	Gut_R1047	GTTTTACCCGCATGCGCGGGGATGATCCTA
Gut_R1047_SP22	ACGGCTGTTTTGAGAGATATAAACAGACAGA	Gut_R1047	GTTTTACCCGCATGCGCGGGGATGATCCTA
Gut_R1047_SP23	TCCGTTTCCTCTTCATCAAATCCAATGTCAA	Gut_R1047	GTTTTACCCGCATGCGCGGGGATGATCCTA
Gut_R1047_SP24	AAAAAATTGTTTGCGTATCAACGCCAACAAT	Gut_R1047	GTTTTACCCGCATGCGCGGGGATGATCCTA
Gut_R1047_SP25	TATCCCAAAATTGTATAGCACCGTCTTCGAG	Gut_R1047	GTTTTACCCGCATGCGCGGGGATGATCCTA
Gut_R1047_SP26	CAAGAAGAGGGGCGGCAGATGCCGTCCCTCT	Gut_R1047	GTTTTACCCGCATGCGCGGGGATGATCCTA
Gut_R1047_SP3	ATGAATGAAGAAATATTAAAAGAATTAAAGT	Gut_R1047	GTTTTACCCGCATGCGCGGGGATGATCCTA
Gut_R1047_SP4	AACACAATAAGAAAAAAAGAAGCTACAGAAG	Gut_R1047	GTTTTACCCGCATGCGCGGGGATGATCCTA
Gut_R1047_SP5	ATAGGATAACTGATATTGAGTCAGCGATTAC	Gut_R1047	GTTTTACCCGCATGCGCGGGGATGATCCTA
Gut_R1047_SP6	CATACCAGGGCTTTGCTAAGAAAAATTACAC	Gut_R1047	GTTTTACCCGCATGCGCGGGGATGATCCTA
Gut_R1047_SP7	GTTATAGAGAAATACCAATCAAAAAAGAACT	Gut_R1047	GTTTTACCCGCATGCGCGGGGATGATCCTA
Gut_R1047_SP8	GCCCATTTAAGTTCAGTAAAACATGAATCTT	Gut_R1047	GTTTTACCCGCATGCGCGGGGATGATCCTA
Gut_R1047_SP9	CCACGCGGCCGCCAAGTAGTTTTCCTTCTGA	Gut_R1047	GTTTTACCCGCATGCGCGGGGATGATCCTA
Gut_R1048_SP1	CTTTTTACCTAGTCGGAAATCGCGCAT	Gut_R1048	AGGTGCCCCATGGCGACTAGGTATTTTTCCATATACG
Gut_R1048_SP2	CTTTTTACCTAGTCCAAAATCGCACAC	Gut_R1048	AGGTGCCCCATGGCGACTAGGTATTTTTCCATATACG
Gut_R1048_SP3	GTTTTTACCTAGTCCGAAATCGCGCAT	Gut_R1048	AGGTGCCCCATGGCGACTAGGTATTTTTCCATATACG
Gut_R1048_SP4	TTTTTTACCTAGCCGAAAATTGCGCAT	Gut_R1048	AGGTGCCCCATGGCGACTAGGTATTTTTCCATATACG
Gut_R1048_SP5	TTTTTTACCTAGTCGAAAATTGCACAC	Gut_R1048	AGGTGCCCCATGGCGACTAGGTATTTTTCCATATACG
Gut_R1049_SP1	AAAGTATTATCGTAGCATTGGCTATAATGCT	Gut_R1049	AATTTCAATCCACACGGCCCGCAAGCCGTGACA
Gut_R1049_SP2	TCCTTATGCTGGACTGACGACCGAAGAATTA	Gut_R1049	AATTTCAATCCACACGGCCCGCAAGCCGTGACA
Gut_R1049_SP3	ACCCGCAAAAATGGCTGATTCACGGCTTTTTCA	Gut_R1049	AATTTCAATCCACACGGCCCGCAAGCCGTGACA
Gut_R1049_SP4	TCGCCAGTCCCGAATCCCTCCGGTACGTATTC	Gut_R1049	AATTTCAATCCACACGGCCCGCAAGCCGTGACA
Gut_R1049_SP5	TGGAACTTGGGTCCTTTATGCAGAGTATCAG	Gut_R1049	AATTTCAATCCACACGGCCCGCAAGCCGTGACA
Gut_R1049_SP6	TTTCCCCGTATACCTTCGCTCTGTTGTAATGC	Gut_R1049	AATTTCAATCCACACGGCCCGCAAGCCGTGACA
Gut_R1049_SP7	TGGTCTGAGCTGAAGGCGGCGGACTTCTCGA	Gut_R1049	AATTTCAATCCACACGGCCCGCAAGCCGTGACA
Gut_R105_SP1	TCCAACATAGCACCGACAATCGTCTGTACCATC	Gut_R105	GTCGCACCCCGCACGGGGTGCGTGAATTGAAAC
Gut_R105_SP10	AACATTATGCATAGCCTTAGACATTGATAATTGAT	Gut_R105	GTCGCACCCCGCACGGGGTGCGTGAATTGAAAC
Gut_R105_SP100	TCATAATCAACAGTTTGAGCTATGGAAGAAAGTTGG	Gut_R105	GTCGCACCCCGCACGGGGTGCGTGAATTGAAAC
Gut_R105_SP101	ATACTTGGCACAACATTTCCACTATCGGGATCGG	Gut_R105	GTCGCACCCCGCACGGGGTGCGTGAATTGAAAC
Gut_R105_SP102	TTTTGCTCTACCTCGTATATACCTGCGTAAGTTGG	Gut_R105	GTCGCACCCCGCACGGGGTGCGTGAATTGAAAC
Gut_R105_SP103	TACCTTTTATTTTCCTCCTCACAGCCTGCGCATC	Gut_R105	GTCGCACCCCGCACGGGGTGCGTGAATTGAAAC
Gut_R105_SP104	GGCGATTGCGGTCTGCTCGTCTTGCTCTATTACT	Gut_R105	GTCGCACCCCGCACGGGGTGCGTGAATTGAAAC
Gut_R105_SP105	GAATTATACTAAGGGTCAATGTCACAATAACCCA	Gut_R105	GTCGCACCCCGCACGGGGTGCGTGAATTGAAAC
Gut_R105_SP106	CATGATTATTACGAAACAGATTAATAATAGCTTTGA	Gut_R105	GTCGCACCCCGCACGGGGTGCGTGAATTGAAAC
Gut_R105_SP107	CATGATTATCGCGAAATAAATTAATAATAGCTTT	Gut_R105	GTCGCACCCCGCACGGGGTGCGTGAATTGAAAC
Gut_R105_SP108	TACCGTATTGCGAAACATCCAAGACGAACGTTTA	Gut_R105	GTCGCACCCCGCACGGGGTGCGTGAATTGAAAC
Gut_R105_SP109	TAAGCTGATGAGTTATGGATTCTAGTGATATTGTA	Gut_R105	GTCGCACCCCGCACGGGGTGCGTGAATTGAAAC
Gut_R105_SP11	CCATAAGTCCAAGTATCAGATACTAGACAACGCAT	Gut_R105	GTCGCACCCCGCACGGGGTGCGTGAATTGAAAC
Gut_R105_SP110	CCTATAAAGCTCGTCATCGCAAAGGCGCCACCCGT	Gut_R105	GTCGCACCCCGCACGGGGTGCGTGAATTGAAAC
Gut_R105_SP111	GGGTGATACGTATTTCGAAGTCATCATAGTCTGGGT	Gut_R105	GTCGCACCCCGCACGGGGTGCGTGAATTGAAAC
Gut_R105_SP112	ATGCTTACATGTTTGAGGAGCAAAACCCCAATA	Gut_R105	GTCGCACCCCGCACGGGGTGCGTGAATTGAAAC
Gut_R105_SP113	CCCAATATAGCCCGTAGCCCTCCCAGCCCAGCC	Gut_R105	GTCGCACCCCGCACGGGGTGCGTGAATTGAAAC
Gut_R105_SP114	GCAGAGGATAGTGCTAAGTCGTGGATAGAGGGC	Gut_R105	GTCGCACCCCGCACGGGGTGCGTGAATTGAAAC
Gut_R105_SP115	TGCTCGTCTGCGATGCCTAACGGCATATCTATC	Gut_R105	GTCGCACCCCGCACGGGGTGCGTGAATTGAAAC
Gut_R105_SP116	TGATAACTGGGACGGGAGATTTTAAGCTCCCGA	Gut_R105	GTCGCACCCCGCACGGGGTGCGTGAATTGAAAC
Gut_R105_SP117	TAGACGTAACCGGGACGGTTACACAGTAGATAA	Gut_R105	GTCGCACCCCGCACGGGGTGCGTGAATTGAAAC
Gut_R105_SP118	GGCAAGCACGTAGACCGAGAGAGGAAACTGGAG	Gut_R105	GTCGCACCCCGCACGGGGTGCGTGAATTGAAAC
Gut_R105_SP119	TTAAAGTAATACTCAACGATATAGCGATTCTGGA	Gut_R105	GTCGCACCCCGCACGGGGTGCGTGAATTGAAAC
Gut_R105_SP12	GTCCGTGCGTCGTCCACCTCGTGGCTCGTCACATCC	Gut_R105	GTCGCACCCCGCACGGGGTGCGTGAATTGAAAC
Gut_R105_SP120	GGCTGTTGCGTCCGTGACGTAAGCCGCGAAAAAGCT	Gut_R105	GTCGCACCCCGCACGGGGTGCGTGAATTGAAAC
Gut_R105_SP121	TTGTCAGTGTTTTATATGGTTTGCTTTTGTTGGT	Gut_R105	GTCGCACCCCGCACGGGGTGCGTGAATTGAAAC
Gut_R105_SP122	CCGTTGAGGCTGTCTACGACTAGCTGTATATGCT	Gut_R105	GTCGCACCCCGCACGGGGTGCGTGAATTGAAAC
Gut_R105_SP123	TACACCTCGTGATATAATACGATATTGGGCACCGA	Gut_R105	GTCGCACCCCGCACGGGGTGCGTGAATTGAAAC
Gut_R105_SP124	ATTAGACAAGACATTCAACCTCGTAAAATCTACA	Gut_R105	GTCGCACCCCGCACGGGGTGCGTGAATTGAAAC
Gut_R105_SP125	TTATCACCATTAGCAGTAGCAAGACCGAAATACTCC	Gut_R105	GTCGCACCCCGCACGGGGTGCGTGAATTGAAAC
Gut_R105_SP126	TGCACTGTTTTTGAGTGCCTTCAGCTTCGCATCG	Gut_R105	GTCGCACCCCGCACGGGGTGCGTGAATTGAAAC
Gut_R105_SP127	CCACATTGAGTAAAGCAAAATAAGGTACTCCAAA	Gut_R105	GTCGCACCCCGCACGGGGTGCGTGAATTGAAAC
Gut_R105_SP128	ATTGAGCAATTGACCAACAAAGGAGATATAAGC	Gut_R105	GTCGCACCCCGCACGGGGTGCGTGAATTGAAAC
Gut_R105_SP129	ATTGAGCAACTGACCGACAAATGAAATGTAAGCTT	Gut_R105	GTCGCACCCCGCACGGGGTGCGTGAATTGAAAC
Gut_R105_SP13	TTGTAAATGCAGTGTGTTAATCAAATACAAGTAT	Gut_R105	GTCGCACCCCGCACGGGGTGCGTGAATTGAAAC
Gut_R105_SP130	CGCATCTTAGCCCGCCTGCAAGGTGACGAGACCGA	Gut_R105	GTCGCACCCCGCACGGGGTGCGTGAATTGAAAC
Gut_R105_SP131	GCCAGCTATTAAGTGATCCCAAAACCAGCGAATAA	Gut_R105	GTCGCACCCCGCACGGGGTGCGTGAATTGAAAC
Gut_R105_SP132	GGCACGCCACGCCTTGTTATCGACCCGATTTCT	Gut_R105	GTCGCACCCCGCACGGGGTGCGTGAATTGAAAC
Gut_R105_SP133	AGAGAGACGCTCCACGGAGCCCGCCACGAGGTCGA	Gut_R105	GTCGCACCCCGCACGGGGTGCGTGAATTGAAAC
Gut_R105_SP134	AGCAGAGCGACCAAGCACCTACGACGTAACACGA	Gut_R105	GTCGCACCCCGCACGGGGTGCGTGAATTGAAAC
Gut_R105_SP135	TTCTGCTCAGAGCCTGCGCCACCCGTATCTGTG	Gut_R105	GTCGCACCCCGCACGGGGTGCGTGAATTGAAAC
Gut_R105_SP136	ACCTCGCCCGTGGAGAGTATGGAGCTAACGCTCT	Gut_R105	GTCGCACCCCGCACGGGGTGCGTGAATTGAAAC
Gut_R105_SP137	GTGTCTCCTCTCTGTTTTCAATTAAGTTTGCCATA	Gut_R105	GTCGCACCCCGCACGGGGTGCGTGAATTGAAAC
Gut_R105_SP138	AACGAGTTTGCCGAGAGCAGACCTGCGGAGGGT	Gut_R105	GTCGCACCCCGCACGGGGTGCGTGAATTGAAAC
Gut_R105_SP139	TTGTACTGCTTCTTGGTGTACTGCATGGTGCTTGTGG	Gut_R105	GTCGCACCCCGCACGGGGTGCGTGAATTGAAAC
Gut_R105_SP14	CATTGGTATGGGTTGTCTCTCATATCGGTTGCCA	Gut_R105	GTCGCACCCCGCACGGGGTGCGTGAATTGAAAC
Gut_R105_SP140	TTTGGGGAGTGAATATAGGGGCTGATTAAGCTAC	Gut_R105	GTCGCACCCCGCACGGGGTGCGTGAATTGAAAC
Gut_R105_SP141	CAAAGGTACTATTATGTGCCTTATCGTCTGTTGAT	Gut_R105	GTCGCACCCCGCACGGGGTGCGTGAATTGAAAC
Gut_R105_SP142	CGTTAGGTGCTGGCGCGTCTCTTATTGGTGGTTAT	Gut_R105	GTCGCACCCCGCACGGGGTGCGTGAATTGAAAC
Gut_R105_SP143	AGATAATACTCAACTATATAGCGATGCTGAAGATC	Gut_R105	GTCGCACCCCGCACGGGGTGCGTGAATTGAAAC
Gut_R105_SP144	TGAGCTTGTATCTTATCCTTTTCAAGCATTGCA	Gut_R105	GTCGCACCCCGCACGGGGTGCGTGAATTGAAAC
Gut_R105_SP145	TGAGCTTGCTACAACGTACCGTGGCGAGCGTGC	Gut_R105	GTCGCACCCCGCACGGGGTGCGTGAATTGAAAC
Gut_R105_SP146	ACCAAGGGCAAAGTCAACTATCAAGGCGACTGTA	Gut_R105	GTCGCACCCCGCACGGGGTGCGTGAATTGAAAC
Gut_R105_SP147	GTGCCAGCTCAGATGAAAGGTGCCTATGTAATGGG	Gut_R105	GTCGCACCCCGCACGGGGTGCGTGAATTGAAAC
Gut_R105_SP148	TACCATCACTGACATTAACTTGGTTAACACGAA	Gut_R105	GTCGCACCCCGCACGGGGTGCGTGAATTGAAAC
Gut_R105_SP149	GTCTACCGTGTGCTCTTCACTTACATCGCAGTCGA	Gut_R105	GTCGCACCCCGCACGGGGTGCGTGAATTGAAAC
Gut_R105_SP15	CCAAAGGGTCAGATAGGTAATCACCCCAATAGCG	Gut_R105	GTCGCACCCCGCACGGGGTGCGTGAATTGAAAC
Gut_R105_SP150	CTTGCTCTCTAGCTCGATACCGAGGTCGTTAAGG	Gut_R105	GTCGCACCCCGCACGGGGTGCGTGAATTGAAAC
Gut_R105_SP151	ACGAATGCCCTTGAAATATCATTATCAGCGCTGGC	Gut_R105	GTCGCACCCCGCACGGGGTGCGTGAATTGAAAC
Gut_R105_SP152	GTGCAACGGATCGCTCCCCGTGTCCACGCTGGC	Gut_R105	GTCGCACCCCGCACGGGGTGCGTGAATTGAAAC
Gut_R105_SP153	TCCTACGTAGCTTTCAAGACCACCGACTAGCAGGG	Gut_R105	GTCGCACCCCGCACGGGGTGCGTGAATTGAAAC
Gut_R105_SP154	ACTGATCCTGATAGTCAGTTGGTTGTGCCTGCTA	Gut_R105	GTCGCACCCCGCACGGGGTGCGTGAATTGAAAC
Gut_R105_SP155	GCTAGTGAGGACGCGCTCACCTTTGTTGACTCGTAT	Gut_R105	GTCGCACCCCGCACGGGGTGCGTGAATTGAAAC
Gut_R105_SP156	TATCCAAATCAATCAAAATGAAAAGATCAGACAAC	Gut_R105	GTCGCACCCCGCACGGGGTGCGTGAATTGAAAC
Gut_R105_SP157	CTCGGCTCCTATGGATAGGTAGGGGGCGGTGTA	Gut_R105	GTCGCACCCCGCACGGGGTGCGTGAATTGAAAC
Gut_R105_SP158	GTAATACAGTCGAACTACAGTATTCTGAATCTGC	Gut_R105	GTCGCACCCCGCACGGGGTGCGTGAATTGAAAC
Gut_R105_SP159	TCCATCTTTGAATAAAGCCATAGAAGAAGGATCC	Gut_R105	GTCGCACCCCGCACGGGGTGCGTGAATTGAAAC
Gut_R105_SP16	ATAGCATCAGATTAAGAAAGAAAACCATCCGAAA	Gut_R105	GTCGCACCCCGCACGGGGTGCGTGAATTGAAAC
Gut_R105_SP160	GCGCTCCTTACCCCAGCCCCGCTCACGGAGACCC	Gut_R105	GTCGCACCCCGCACGGGGTGCGTGAATTGAAAC
Gut_R105_SP161	GTGATTTTGACACGCAGTAGCTACAAGGCACGAGA	Gut_R105	GTCGCACCCCGCACGGGGTGCGTGAATTGAAAC
Gut_R105_SP162	TGCGCATCACCCATGGATATGTCGCCTATCGCCTT	Gut_R105	GTCGCACCCCGCACGGGGTGCGTGAATTGAAAC
Gut_R105_SP163	ACGAACACGGCTTGATTATAGGTCTTCACTTTGT	Gut_R105	GTCGCACCCCGCACGGGGTGCGTGAATTGAAAC
Gut_R105_SP164	TAACAGATGTGGGGGTCGAAGGCTTGTCCTTTGCC	Gut_R105	GTCGCACCCCGCACGGGGTGCGTGAATTGAAAC
Gut_R105_SP165	AAGACTTGTATTTGGTTAACACACTGCACTTAT	Gut_R105	GTCGCACCCCGCACGGGGTGCGTGAATTGAAAC
Gut_R105_SP166	GATGATTAGAGCTATGGAACTAGCGGATATAAAGAA	Gut_R105	GTCGCACCCCGCACGGGGTGCGTGAATTGAAAC
Gut_R105_SP167	GATACTTACAAGTATTCATAAGACATCAGACTAA	Gut_R105	GTCGCACCCCGCACGGGGTGCGTGAATTGAAAC
Gut_R105_SP168	GATACTTACATGTATTCATAGCATGATCAGATTAA	Gut_R105	GTCGCACCCCGCACGGGGTGCGTGAATTGAAAC
Gut_R105_SP169	AGCGTTGATGCGCCCCAGTTGAGGTCGGGCGAGT	Gut_R105	GTCGCACCCCGCACGGGGTGCGTGAATTGAAAC
Gut_R105_SP17	ATAGCACATCAGACTAAGAAAGAAAACCATCCGAAA	Gut_R105	GTCGCACCCCGCACGGGGTGCGTGAATTGAAAC
Gut_R105_SP170	AAGTAATAGGTAATCGCCATTCTCTCTCGTGTTA	Gut_R105	GTCGCACCCCGCACGGGGTGCGTGAATTGAAAC
Gut_R105_SP171	TGGGATCATCTTATTATAGGTGATTCCTACCCT	Gut_R105	GTCGCACCCCGCACGGGGTGCGTGAATTGAAAC
Gut_R105_SP172	AAATCTACAGTCTGATTGGGTAGAGTATCAGAGAC	Gut_R105	GTCGCACCCCGCACGGGGTGCGTGAATTGAAAC
Gut_R105_SP173	TACGAGGGACTACGAAACAAACAAGACAATGACAA	Gut_R105	GTCGCACCCCGCACGGGGTGCGTGAATTGAAAC
Gut_R105_SP174	CCTTGTGTGCTCTGGCACGAGGTAGAGGTGCAGGT	Gut_R105	GTCGCACCCCGCACGGGGTGCGTGAATTGAAAC
Gut_R105_SP175	GATCCACATCAGACACGTTAAGCACATAAGAGTC	Gut_R105	GTCGCACCCCGCACGGGGTGCGTGAATTGAAAC
Gut_R105_SP176	TATACTTACATGTATTCATAACATCAGAAGATAA	Gut_R105	GTCGCACCCCGCACGGGGTGCGTGAATTGAAAC
Gut_R105_SP177	GTCACTCTTGCGAGGTGATAAGGGGCGGTGGGTGA	Gut_R105	GTCGCACCCCGCACGGGGTGCGTGAATTGAAAC
Gut_R105_SP178	TCATTAGCGGGGAGACTAGTACGGACTTTGATGA	Gut_R105	GTCGCACCCCGCACGGGGTGCGTGAATTGAAAC
Gut_R105_SP179	GCTTCTTGTGGCTGATAGCTCTCTAGCTTGTA	Gut_R105	GTCGCACCCCGCACGGGGTGCGTGAATTGAAAC
Gut_R105_SP18	TTACCAACATACGAGAATATACGAGGATCAGGAC	Gut_R105	GTCGCACCCCGCACGGGGTGCGTGAATTGAAAC
Gut_R105_SP180	TTTATCAGCTGTAATTTTCTCAGTCTGCAAATCTT	Gut_R105	GTCGCACCCCGCACGGGGTGCGTGAATTGAAAC
Gut_R105_SP181	TCATCGAGGGCGTATCACAGCGACAGATAGCCAA	Gut_R105	GTCGCACCCCGCACGGGGTGCGTGAATTGAAAC
Gut_R105_SP182	ACTGCCATAAGCTGTTGCCCGCAATAGATTGTCT	Gut_R105	GTCGCACCCCGCACGGGGTGCGTGAATTGAAAC
Gut_R105_SP183	ATTCGTGTAGCGCAGTAGCTCGCGCTCCGTAGC	Gut_R105	GTCGCACCCCGCACGGGGTGCGTGAATTGAAAC
Gut_R105_SP184	GGGACAAGCTGGAGTGCACACCCGACTACTCGGG	Gut_R105	GTCGCACCCCGCACGGGGTGCGTGAATTGAAAC
Gut_R105_SP185	CGTTGCGACTGAGTGCCCACTCAATCTCGTAGA	Gut_R105	GTCGCACCCCGCACGGGGTGCGTGAATTGAAAC
Gut_R105_SP186	GCTTGTATCTTATCCTTTTCCAACATAGCACCGA	Gut_R105	GTCGCACCCCGCACGGGGTGCGTGAATTGAAAC
Gut_R105_SP187	GCTACTTGTGTCGTCAAATTCGCCCTCGATATAA	Gut_R105	GTCGCACCCCGCACGGGGTGCGTGAATTGAAAC
Gut_R105_SP188	ACTTATTGAAGATCTATAAACTATGCCAAATCT	Gut_R105	GTCGCACCCCGCACGGGGTGCGTGAATTGAAAC
Gut_R105_SP189	GTTGATGAAGTAGCTCTGCCCCTTGGGGGTGACTA	Gut_R105	GTCGCACCCCGCACGGGGTGCGTGAATTGAAAC
Gut_R105_SP19	CTAGGACACATACTCAAACAGACATACAAGAGCT	Gut_R105	GTCGCACCCCGCACGGGGTGCGTGAATTGAAAC
Gut_R105_SP190	TACACAGTACGGTAATATGGTACAGTTGGATATG	Gut_R105	GTCGCACCCCGCACGGGGTGCGTGAATTGAAAC
Gut_R105_SP191	TTAAATCTGAGCGCCTGCCCCAGCTTGTAGTGGG	Gut_R105	GTCGCACCCCGCACGGGGTGCGTGAATTGAAAC
Gut_R105_SP192	TTCCTCTTGGCAGGAGGGATACTGAGCGATGATTA	Gut_R105	GTCGCACCCCGCACGGGGTGCGTGAATTGAAAC
Gut_R105_SP193	GTCCTCTTGCTCGCTATGATGGTAATGTATTAAGA	Gut_R105	GTCGCACCCCGCACGGGGTGCGTGAATTGAAAC
Gut_R105_SP194	ACCCCACATTGCAGGGCACTTTTTATACCAAAAC	Gut_R105	GTCGCACCCCGCACGGGGTGCGTGAATTGAAAC
Gut_R105_SP195	TAGTGAACGTAATAAGACTGAAAAGGAAATGAATA	Gut_R105	GTCGCACCCCGCACGGGGTGCGTGAATTGAAAC
Gut_R105_SP196	AGTACGGAGCCGACAAGCTTGTCGCCACGCTAGAG	Gut_R105	GTCGCACCCCGCACGGGGTGCGTGAATTGAAAC
Gut_R105_SP197	ATCACCGTACTCGTGACACAAGAAATACCGAACT	Gut_R105	GTCGCACCCCGCACGGGGTGCGTGAATTGAAAC
Gut_R105_SP198	GGCTACCTCCTATGCTATTGGCTACAGACACGCCA	Gut_R105	GTCGCACCCCGCACGGGGTGCGTGAATTGAAAC
Gut_R105_SP199	GTGTATCTTGGTCAGCTGGCGGTCTACTGCCTC	Gut_R105	GTCGCACCCCGCACGGGGTGCGTGAATTGAAAC
Gut_R105_SP2	AGACAGCTCTCGGCAAGAAGCTCGACTCCTCAAC	Gut_R105	GTCGCACCCCGCACGGGGTGCGTGAATTGAAAC
Gut_R105_SP20	AGAAATAATCATGGAAAAGAGAAGCTATGAATAT	Gut_R105	GTCGCACCCCGCACGGGGTGCGTGAATTGAAAC
Gut_R105_SP200	TCTAGCTTTCGCAGGAGCTATTGCGGGAGCTGGCTT	Gut_R105	GTCGCACCCCGCACGGGGTGCGTGAATTGAAAC
Gut_R105_SP201	TCGTCTCCGAAGTATACCTCCTCGTCCGCAAAG	Gut_R105	GTCGCACCCCGCACGGGGTGCGTGAATTGAAAC
Gut_R105_SP202	GCTCTGATAATCTGAGACTTACGGTCTTGTATGT	Gut_R105	GTCGCACCCCGCACGGGGTGCGTGAATTGAAAC
Gut_R105_SP203	TCGCTAGACGACGAGTGCCGACTCTTAGCGGAC	Gut_R105	GTCGCACCCCGCACGGGGTGCGTGAATTGAAAC
Gut_R105_SP204	TTGTCCATTGGTTAGTACTAGTTGGATTGTTAAT	Gut_R105	GTCGCACCCCGCACGGGGTGCGTGAATTGAAAC
Gut_R105_SP205	AGCCAGCGCTGATAGTGATATTTCAAGGGCATAC	Gut_R105	GTCGCACCCCGCACGGGGTGCGTGAATTGAAAC
Gut_R105_SP206	CCGAAAAGGAGAACCCCCCCTCGCTGAGGTCTGCTG	Gut_R105	GTCGCACCCCGCACGGGGTGCGTGAATTGAAAC
Gut_R105_SP207	TCTCTGATGCACGAGGTCGCACACCTATTGCTAC	Gut_R105	GTCGCACCCCGCACGGGGTGCGTGAATTGAAAC
Gut_R105_SP208	TAGCAACGAGGGGGCGGGGTATACGGCTCCGCT	Gut_R105	GTCGCACCCCGCACGGGGTGCGTGAATTGAAAC
Gut_R105_SP209	ACCGCCAAGAGCAAGCGTGAGAAGGTGGACGCTA	Gut_R105	GTCGCACCCCGCACGGGGTGCGTGAATTGAAAC
Gut_R105_SP21	TCCAGCTCGGGGCGTGAGGCGAGCGTGCCTAGCT	Gut_R105	GTCGCACCCCGCACGGGGTGCGTGAATTGAAAC
Gut_R105_SP210	CTGCTGGCAGGCTCGATACTGAGCGATGATTAAGT	Gut_R105	GTCGCACCCCGCACGGGGTGCGTGAATTGAAAC
Gut_R105_SP211	ATCTGGCGCATCAGCTCGGCGCTCGCCTGCTGGCT	Gut_R105	GTCGCACCCCGCACGGGGTGCGTGAATTGAAAC
Gut_R105_SP212	ACGCTTAACACCGATATCGATGCTAAGCTCCTACT	Gut_R105	GTCGCACCCCGCACGGGGTGCGTGAATTGAAAC
Gut_R105_SP213	ACCCAGGTTCCCGATGTAAAAGCGTACCCGTCCA	Gut_R105	GTCGCACCCCGCACGGGGTGCGTGAATTGAAAC
Gut_R105_SP214	CTCGCAGGGTGTAGATGCTGCCGTCGGGGTAT	Gut_R105	GTCGCACCCCGCACGGGGTGCGTGAATTGAAAC
Gut_R105_SP215	GAATACAATCCAAAGATACAAAAACTACTTAATA	Gut_R105	GTCGCACCCCGCACGGGGTGCGTGAATTGAAAC
Gut_R105_SP216	ATCTTGGTGTATAACTATCGTAATTTGCACGATG	Gut_R105	GTCGCACCCCGCACGGGGTGCGTGAATTGAAAC
Gut_R105_SP217	ATGCCTCCCCGTCATCGATGGTGCTGACGGCATC	Gut_R105	GTCGCACCCCGCACGGGGTGCGTGAATTGAAAC
Gut_R105_SP218	AAAACATTACCATTATAACGAGCAAGCGGACGCA	Gut_R105	GTCGCACCCCGCACGGGGTGCGTGAATTGAAAC
Gut_R105_SP219	TATTTCTTGATAACCGAGCGTCGAGAAATGAGGGT	Gut_R105	GTCGCACCCCGCACGGGGTGCGTGAATTGAAAC
Gut_R105_SP22	TCACAGGAGAGGGAGAGATGCTCAAAGCAGACACC	Gut_R105	GTCGCACCCCGCACGGGGTGCGTGAATTGAAAC
Gut_R105_SP220	CTTATACCAATTCTAACGTATCTCTTTATCACG	Gut_R105	GTCGCACCCCGCACGGGGTGCGTGAATTGAAAC
Gut_R105_SP221	GTGCCCGATGCGATGGCCGGGATGCCGGATCGGA	Gut_R105	GTCGCACCCCGCACGGGGTGCGTGAATTGAAAC
Gut_R105_SP222	GCACGTCACCGACCTTGAATGCAATCTCGTCCACA	Gut_R105	GTCGCACCCCGCACGGGGTGCGTGAATTGAAAC
Gut_R105_SP223	TCGCCATTTGCCGTGATGGCAGACAAGACGGGCAAG	Gut_R105	GTCGCACCCCGCACGGGGTGCGTGAATTGAAAC
Gut_R105_SP224	CGCCTAGACGGACTTGGCGGTAAAGCTCCCAGCG	Gut_R105	GTCGCACCCCGCACGGGGTGCGTGAATTGAAAC
Gut_R105_SP225	CTCAAACATTCAGAATTAGTAATCCAATAAGCCA	Gut_R105	GTCGCACCCCGCACGGGGTGCGTGAATTGAAAC
Gut_R105_SP226	CTTGATGATCTGGTACAGCATCTCCTGTGCCGG	Gut_R105	GTCGCACCCCGCACGGGGTGCGTGAATTGAAAC
Gut_R105_SP227	CTTGATGCGATCGTGCATAAGCATCACTCCTCAC	Gut_R105	GTCGCACCCCGCACGGGGTGCGTGAATTGAAAC
Gut_R105_SP228	AGTAGCCGACTAATTTAAACAAGTGTGGGGGGGT	Gut_R105	GTCGCACCCCGCACGGGGTGCGTGAATTGAAAC
Gut_R105_SP229	GAGCGTGGCTGCATCACCATCTGCGACCGCTCCAC	Gut_R105	GTCGCACCCCGCACGGGGTGCGTGAATTGAAAC
Gut_R105_SP23	CTTCATTGTCTTCGATGCATACTGCAAATACATA	Gut_R105	GTCGCACCCCGCACGGGGTGCGTGAATTGAAAC
Gut_R105_SP230	GTCTCCAGCCTATGCTGTCTCCTCTGATGCATA	Gut_R105	GTCGCACCCCGCACGGGGTGCGTGAATTGAAAC
Gut_R105_SP231	GTTGAGGTCTTTGGCGATCCAATGCTCCTCGCTGA	Gut_R105	GTCGCACCCCGCACGGGGTGCGTGAATTGAAAC
Gut_R105_SP232	ATATGCTATCCCAGTGCTATTGCTGTTGCTTGCTA	Gut_R105	GTCGCACCCCGCACGGGGTGCGTGAATTGAAAC
Gut_R105_SP233	GTCCGCTGGCTCGTTATAATGGTAATGTTTTAAGCT	Gut_R105	GTCGCACCCCGCACGGGGTGCGTGAATTGAAAC
Gut_R105_SP234	TCTAAAATTGGAGAGGCTTTTGGCACCTGGGGGCC	Gut_R105	GTCGCACCCCGCACGGGGTGCGTGAATTGAAAC
Gut_R105_SP235	CCGTCTGAGAGGTCGGTGCGTCTTGTGGTCTCGC	Gut_R105	GTCGCACCCCGCACGGGGTGCGTGAATTGAAAC
Gut_R105_SP236	TTCTCAACTGCGAATGCCCTTGAAATATCATTAT	Gut_R105	GTCGCACCCCGCACGGGGTGCGTGAATTGAAAC
Gut_R105_SP237	ATCAGCCTGGACGTACCTGGCGATCCAAAGTAGAG	Gut_R105	GTCGCACCCCGCACGGGGTGCGTGAATTGAAAC
Gut_R105_SP238	ACTTGATCATGAGGTTCGTTCGAGTTTCGAAATGG	Gut_R105	GTCGCACCCCGCACGGGGTGCGTGAATTGAAAC
Gut_R105_SP239	ATCAAAGTGCCCTGCGGTACTTGTTACGCTTGTCA	Gut_R105	GTCGCACCCCGCACGGGGTGCGTGAATTGAAAC
Gut_R105_SP24	GACAATCGCCTTACCGCTGGAGAAGTCACGAGAT	Gut_R105	GTCGCACCCCGCACGGGGTGCGTGAATTGAAAC
Gut_R105_SP240	ATCAAAGTGCCCTGCGGTACTTGTTACGCTTGT	Gut_R105	GTCGCACCCCGCACGGGGTGCGTGAATTGAAAC
Gut_R105_SP241	GACTATATAACGATGTTGAAGAGCTCTATTTGCC	Gut_R105	GTCGCACCCCGCACGGGGTGCGTGAATTGAAAC
Gut_R105_SP242	AGTTGCGGGTACTGAGCAGATAATCTGCTTAGTT	Gut_R105	GTCGCACCCCGCACGGGGTGCGTGAATTGAAAC
Gut_R105_SP243	TCCAGTGGCAAGGCCATTGTCGAGGTGCCAGGGA	Gut_R105	GTCGCACCCCGCACGGGGTGCGTGAATTGAAAC
Gut_R105_SP244	GTTCAAGCTTTGAGATGGGTCAATTAGTCCCTTT	Gut_R105	GTCGCACCCCGCACGGGGTGCGTGAATTGAAAC
Gut_R105_SP245	GATCCGGAAAAATCATACAAAGAAACAGAAAGATGAGAA	Gut_R105	GTCGCACCCCGCACGGGGTGCGTGAATTGAAAC
Gut_R105_SP246	GCATAAAGGTCTCCTGACATTGCTCGGAGTTAGAG	Gut_R105	GTCGCACCCCGCACGGGGTGCGTGAATTGAAAC
Gut_R105_SP247	ACAGCGCACGCCACACCTTTGCGACGATGATGCT	Gut_R105	GTCGCACCCCGCACGGGGTGCGTGAATTGAAAC
Gut_R105_SP248	TTAGTGATGTCTGTCTTAGCGGTCGAGAGATCTTG	Gut_R105	GTCGCACCCCGCACGGGGTGCGTGAATTGAAAC
Gut_R105_SP249	ATTTACTGATCATTCTTTGGTTAATAATCACGTGT	Gut_R105	GTCGCACCCCGCACGGGGTGCGTGAATTGAAAC
Gut_R105_SP25	GATTTGTCCGCAGTTACTTGTGACTTATCAAGGG	Gut_R105	GTCGCACCCCGCACGGGGTGCGTGAATTGAAAC
Gut_R105_SP250	TTTGTTATTAGCGCGGATCGAAGCGGACATTCTG	Gut_R105	GTCGCACCCCGCACGGGGTGCGTGAATTGAAAC
Gut_R105_SP251	TTTGTTATTAGCGCGGATAGATTTAGACATACGGT	Gut_R105	GTCGCACCCCGCACGGGGTGCGTGAATTGAAAC
Gut_R105_SP252	GGGTCGCCAACTGGTGACCGCACGCTGATACGA	Gut_R105	GTCGCACCCCGCACGGGGTGCGTGAATTGAAAC
Gut_R105_SP253	CTTGCCGTCTGTTAGGTTGTAGATGGCTATTTGCT	Gut_R105	GTCGCACCCCGCACGGGGTGCGTGAATTGAAAC
Gut_R105_SP254	AAGTCTCTAGAGAAGGGAGTAGCTGAAGCAACAAA	Gut_R105	GTCGCACCCCGCACGGGGTGCGTGAATTGAAAC
Gut_R105_SP255	ACGTATCTCAGCACTAGAGAAATTCTCGGGACGC	Gut_R105	GTCGCACCCCGCACGGGGTGCGTGAATTGAAAC
Gut_R105_SP256	TCGCCCCTAGCCGTTATGGCGGACAAGACGGGCA	Gut_R105	GTCGCACCCCGCACGGGGTGCGTGAATTGAAAC
Gut_R105_SP257	GATTATCGGTCTTCATTTTGTACGCCCGAGACCA	Gut_R105	GTCGCACCCCGCACGGGGTGCGTGAATTGAAAC
Gut_R105_SP258	ACTTAGAGAACTTAATAATCATGGAAAAAAGAAGTT	Gut_R105	GTCGCACCCCGCACGGGGTGCGTGAATTGAAAC
Gut_R105_SP259	AATAATACCAGACAAAGAAGAAGCCTCAGCATC	Gut_R105	GTCGCACCCCGCACGGGGTGCGTGAATTGAAAC
Gut_R105_SP26	ATCTGAGGATAGTTCGGATACCTTTGATAGTCCT	Gut_R105	GTCGCACCCCGCACGGGGTGCGTGAATTGAAAC
Gut_R105_SP260	AAGTGCAATCTCAAACAAATCATTACTAACAAAA	Gut_R105	GTCGCACCCCGCACGGGGTGCGTGAATTGAAAC
Gut_R105_SP261	AAAAGCGCCACGGATATACTGCTCAGCCTCGTCC	Gut_R105	GTCGCACCCCGCACGGGGTGCGTGAATTGAAAC
Gut_R105_SP262	TTAATGTATCAGATGTTGATCAGACAGCTCCCT	Gut_R105	GTCGCACCCCGCACGGGGTGCGTGAATTGAAAC
Gut_R105_SP263	TTCCGATACTCTAGATACTCCAGACATTACTAAG	Gut_R105	GTCGCACCCCGCACGGGGTGCGTGAATTGAAAC
Gut_R105_SP264	ATCATATTAACGAGCGGGGGGGCGGTCCAAAGGAC	Gut_R105	GTCGCACCCCGCACGGGGTGCGTGAATTGAAAC
Gut_R105_SP265	AGGTTCTTATTCTAAGTTCAAAAATAACTCTGT	Gut_R105	GTCGCACCCCGCACGGGGTGCGTGAATTGAAAC
Gut_R105_SP266	GCCATTGCAGAGCTCTGCTGAGGAGCAACTCTGT	Gut_R105	GTCGCACCCCGCACGGGGTGCGTGAATTGAAAC
Gut_R105_SP267	TTAAGATAATACTCAACTATATAGCGATGCTGAA	Gut_R105	GTCGCACCCCGCACGGGGTGCGTGAATTGAAAC
Gut_R105_SP268	ATACGTCTATCAATTATATCATTGTGCATCTTCG	Gut_R105	GTCGCACCCCGCACGGGGTGCGTGAATTGAAAC
Gut_R105_SP269	ATACGTCGCTCTATTATATCATTGTGCATCTTAG	Gut_R105	GTCGCACCCCGCACGGGGTGCGTGAATTGAAAC
Gut_R105_SP27	TGTACTCTTACATACAATGATACTGCCTTGCTGGG	Gut_R105	GTCGCACCCCGCACGGGGTGCGTGAATTGAAAC
Gut_R105_SP270	CTTGTGCCACGAGTACGGAGATGAGTCTCTACGGT	Gut_R105	GTCGCACCCCGCACGGGGTGCGTGAATTGAAAC
Gut_R105_SP271	CCTTTGCACTGGTTAATCTGTAGAGGGTGGAGCG	Gut_R105	GTCGCACCCCGCACGGGGTGCGTGAATTGAAAC
Gut_R105_SP272	AAGAGCGTAACGACCGCCAAGCGTGCTGAGGTCGA	Gut_R105	GTCGCACCCCGCACGGGGTGCGTGAATTGAAAC
Gut_R105_SP273	GTCACATCCAGCCCATCGCCCTATCCATGGACT	Gut_R105	GTCGCACCCCGCACGGGGTGCGTGAATTGAAAC
Gut_R105_SP274	ATCTTTCGGGCGAGTAACGTCAAGCTCTCTAGAC	Gut_R105	GTCGCACCCCGCACGGGGTGCGTGAATTGAAAC
Gut_R105_SP275	ATCTTTCGGACGTGCAACATCAAGTTCACGAGCT	Gut_R105	GTCGCACCCCGCACGGGGTGCGTGAATTGAAAC
Gut_R105_SP276	CACGTTGCGGAACTGCTTAGTAACATACTTAGAT	Gut_R105	GTCGCACCCCGCACGGGGTGCGTGAATTGAAAC
Gut_R105_SP277	ACGGAGGGGCTGGCGATGGCGCTGGAGGACGAC	Gut_R105	GTCGCACCCCGCACGGGGTGCGTGAATTGAAAC
Gut_R105_SP278	GCGCCGACACCGCTGATAAGGTGCGCCGCGCCGC	Gut_R105	GTCGCACCCCGCACGGGGTGCGTGAATTGAAAC
Gut_R105_SP279	GAGACGGAGACCAATATGAGCGTCATCTGTGAGGA	Gut_R105	GTCGCACCCCGCACGGGGTGCGTGAATTGAAAC
Gut_R105_SP28	ATCGCTGAGCAGTACACGCACTACGCTACAAGGC	Gut_R105	GTCGCACCCCGCACGGGGTGCGTGAATTGAAAC
Gut_R105_SP280	TTAAGAGCCTGACCATCCATCAATTGCCTAACAAG	Gut_R105	GTCGCACCCCGCACGGGGTGCGTGAATTGAAAC
Gut_R105_SP281	GGGTGCGTCCTCTAATCGTAGCTCCTCCTTAAC	Gut_R105	GTCGCACCCCGCACGGGGTGCGTGAATTGAAAC
Gut_R105_SP282	AATGTTTCTGATGTAGATCAAACTGCACCTTCAGAG	Gut_R105	GTCGCACCCCGCACGGGGTGCGTGAATTGAAAC
Gut_R105_SP283	ATGATTCAACTGCCTATCATACAACAATAAAGC	Gut_R105	GTCGCACCCCGCACGGGGTGCGTGAATTGAAAC
Gut_R105_SP284	CACATACTATATAATAGTATAAGATACTCCAAAG	Gut_R105	GTCGCACCCCGCACGGGGTGCGTGAATTGAAAC
Gut_R105_SP285	TTAGATTCCGAAATCTCCTTATCAGCAGTAATC	Gut_R105	GTCGCACCCCGCACGGGGTGCGTGAATTGAAAC
Gut_R105_SP286	CATCTCCTTTGCCTGCTATAATTGGTGCTGGTG	Gut_R105	GTCGCACCCCGCACGGGGTGCGTGAATTGAAAC
Gut_R105_SP287	TCCGACTTTGGGGTGCTGGGGCGTACAAGATTG	Gut_R105	GTCGCACCCCGCACGGGGTGCGTGAATTGAAAC
Gut_R105_SP288	CACCCAACAAGAGACGAGGCGCAAAACGAGTGGCA	Gut_R105	GTCGCACCCCGCACGGGGTGCGTGAATTGAAAC
Gut_R105_SP289	GTATTTAACGCTAGCGTATGTCCTAAAGTTAGA	Gut_R105	GTCGCACCCCGCACGGGGTGCGTGAATTGAAAC
Gut_R105_SP29	GAAGAGGGGTGTATCGCCACTCTTGACGAAGGTCGC	Gut_R105	GTCGCACCCCGCACGGGGTGCGTGAATTGAAAC
Gut_R105_SP290	GCATAGCTCGTCATCATCGATATCGTCGATGACGA	Gut_R105	GTCGCACCCCGCACGGGGTGCGTGAATTGAAAC
Gut_R105_SP291	GTGATGATTTGGAGCAATTCGTTCCAAACGAAG	Gut_R105	GTCGCACCCCGCACGGGGTGCGTGAATTGAAAC
Gut_R105_SP292	CAGCACTAGCCACGGGGCGGGAGCTACACTACT	Gut_R105	GTCGCACCCCGCACGGGGTGCGTGAATTGAAAC
Gut_R105_SP293	AGCCATCGTGACACCTCACGGAGGTTGTCCGAGG	Gut_R105	GTCGCACCCCGCACGGGGTGCGTGAATTGAAAC
Gut_R105_SP294	TTAATTTGATAAGAACCGATTAAACGATCAAGA	Gut_R105	GTCGCACCCCGCACGGGGTGCGTGAATTGAAAC
Gut_R105_SP295	ATCAAGATCCGACCTCATATAGTAGTGATTATAT	Gut_R105	GTCGCACCCCGCACGGGGTGCGTGAATTGAAAC
Gut_R105_SP296	GCCCTCAAGCAGGCACGCATCTCAGCGCAGGAGGA	Gut_R105	GTCGCACCCCGCACGGGGTGCGTGAATTGAAAC
Gut_R105_SP297	CAGGCGATAAGTATCGCGTACAATCTAGTACGCT	Gut_R105	GTCGCACCCCGCACGGGGTGCGTGAATTGAAAC
Gut_R105_SP298	TTGCAAGGTCTATATGTCGTATTATTAAACAATT	Gut_R105	GTCGCACCCCGCACGGGGTGCGTGAATTGAAAC
Gut_R105_SP299	TGCACTTACAGCACCTCCTCACTGATTGCGTCCGC	Gut_R105	GTCGCACCCCGCACGGGGTGCGTGAATTGAAAC
Gut_R105_SP3	TTCACGCTCCCGTGGCAGGAGATGCGCACCCAGC	Gut_R105	GTCGCACCCCGCACGGGGTGCGTGAATTGAAAC
Gut_R105_SP30	GACACGCAGGGCGGTATTTTGATGCACAACAAGGC	Gut_R105	GTCGCACCCCGCACGGGGTGCGTGAATTGAAAC
Gut_R105_SP300	GCGAAGATGATCAAGGACGCAGAGGAGACGCACC	Gut_R105	GTCGCACCCCGCACGGGGTGCGTGAATTGAAAC
Gut_R105_SP301	CTGCAATGCCGTCACACGCTTTGAGACGGGAGTC	Gut_R105	GTCGCACCCCGCACGGGGTGCGTGAATTGAAAC
Gut_R105_SP302	GCAACTTATGAGGAGTTCAGAGTAGTAGCTAAT	Gut_R105	GTCGCACCCCGCACGGGGTGCGTGAATTGAAAC
Gut_R105_SP303	GTTGGAGTATTTTGGTCTTGCATCGTCATTAGA	Gut_R105	GTCGCACCCCGCACGGGGTGCGTGAATTGAAAC
Gut_R105_SP304	TTATGCGCGAGGTCGAAAAAAATGTGGTTTTTCAG	Gut_R105	GTCGCACCCCGCACGGGGTGCGTGAATTGAAAC
Gut_R105_SP305	TCCGCAGTTACCTATCTGCTCTATATGCCAGGAC	Gut_R105	GTCGCACCCCGCACGGGGTGCGTGAATTGAAAC
Gut_R105_SP306	TCCGATGTCACGTCCGAGTGGGTGCAGGGCTTCC	Gut_R105	GTCGCACCCCGCACGGGGTGCGTGAATTGAAAC
Gut_R105_SP307	TAGTCGCCTAACGATCTCGTAGTCCAAATCTCTA	Gut_R105	GTCGCACCCCGCACGGGGTGCGTGAATTGAAAC
Gut_R105_SP308	CTCAGGTAATTGCCGTTGCGACTGAGTGCCCACT	Gut_R105	GTCGCACCCCGCACGGGGTGCGTGAATTGAAAC
Gut_R105_SP309	AAATTGTATCTTGTTTTCTTGTATTCTCAGTTCAG	Gut_R105	GTCGCACCCCGCACGGGGTGCGTGAATTGAAAC
Gut_R105_SP31	GATGAGGCACCTTATGATGTATATAAGCCCGTGGAT	Gut_R105	GTCGCACCCCGCACGGGGTGCGTGAATTGAAAC
Gut_R105_SP310	TGCTTTTATGGCGCGCGAGGCTAGAGAACTAGCC	Gut_R105	GTCGCACCCCGCACGGGGTGCGTGAATTGAAAC
Gut_R105_SP311	ACGTTGTGATCGATCGGCTTTTGGGGCAAGCATCT	Gut_R105	GTCGCACCCCGCACGGGGTGCGTGAATTGAAAC
Gut_R105_SP312	ACGTTGTTGAGTCGCTTATCTAGGTCATCAAGG	Gut_R105	GTCGCACCCCGCACGGGGTGCGTGAATTGAAAC
Gut_R105_SP313	TCGTCCATTGCTAGTATCGTAGATAGTATTCTCTCG	Gut_R105	GTCGCACCCCGCACGGGGTGCGTGAATTGAAAC
Gut_R105_SP314	ACCTCGAGAAATGGGACGGTGTCCATTTGGTTGG	Gut_R105	GTCGCACCCCGCACGGGGTGCGTGAATTGAAAC
Gut_R105_SP315	TTTAGGCACCCAATATCGTATTATATCACGAGGA	Gut_R105	GTCGCACCCCGCACGGGGTGCGTGAATTGAAAC
Gut_R105_SP316	TCAGGGCGAAGCTGATCAACATACCGCTTATC	Gut_R105	GTCGCACCCCGCACGGGGTGCGTGAATTGAAAC
Gut_R105_SP317	CTCTGTACGAGCATCAGACCAAGCATTATTTATA	Gut_R105	GTCGCACCCCGCACGGGGTGCGTGAATTGAAAC
Gut_R105_SP318	GCCACGAAGAAAATGCGGTTAAGTTGCGTATTAG	Gut_R105	GTCGCACCCCGCACGGGGTGCGTGAATTGAAAC
Gut_R105_SP319	ATTTTATCCTGCATCTCATTCATCTGCTTATACTGC	Gut_R105	GTCGCACCCCGCACGGGGTGCGTGAATTGAAAC
Gut_R105_SP32	GCGCTTGTTGTAACACATATTATATACTGTCTAA	Gut_R105	GTCGCACCCCGCACGGGGTGCGTGAATTGAAAC
Gut_R105_SP320	ATTTTATCTTGCATCTCGTTCATTCGGCGCCAC	Gut_R105	GTCGCACCCCGCACGGGGTGCGTGAATTGAAAC
Gut_R105_SP321	AGATGGTGCAGACGATTGTCGGCGGTATGCTTG	Gut_R105	GTCGCACCCCGCACGGGGTGCGTGAATTGAAAC
Gut_R105_SP322	TCAGTCTTATTACGTTCAGTAGCAATATCTTTATT	Gut_R105	GTCGCACCCCGCACGGGGTGCGTGAATTGAAAC
Gut_R105_SP323	CCGTCTATGGCTGCACTAGAGGCGCAGTTCGTAGG	Gut_R105	GTCGCACCCCGCACGGGGTGCGTGAATTGAAAC
Gut_R105_SP324	ACATTACGGAACTGCTTAGTAACGTACTTAGATAGA	Gut_R105	GTCGCACCCCGCACGGGGTGCGTGAATTGAAAC
Gut_R105_SP325	GTGCTAGAAGCAGATAACGCTTGATAGTTAAGA	Gut_R105	GTCGCACCCCGCACGGGGTGCGTGAATTGAAAC
Gut_R105_SP326	GTCTCTCAGCTTTTGAATGAAGATGAGGATATA	Gut_R105	GTCGCACCCCGCACGGGGTGCGTGAATTGAAAC
Gut_R105_SP327	GCGTCACGATTGTGCCATCCTCCCAAAGGATAA	Gut_R105	GTCGCACCCCGCACGGGGTGCGTGAATTGAAAC
Gut_R105_SP328	GACCAGGGAGATGACAGCTACCTCTCTGAGGAGA	Gut_R105	GTCGCACCCCGCACGGGGTGCGTGAATTGAAAC
Gut_R105_SP329	CTTATCAAGGGTGAAACGTCAATAAAACCTCGTC	Gut_R105	GTCGCACCCCGCACGGGGTGCGTGAATTGAAAC
Gut_R105_SP33	AGCTCGACCCATAGCGTCTTGCCGTGGGGCATCAA	Gut_R105	GTCGCACCCCGCACGGGGTGCGTGAATTGAAAC
Gut_R105_SP330	TTCCAATACCTATCAGATGTAATTGCCCGCCACCT	Gut_R105	GTCGCACCCCGCACGGGGTGCGTGAATTGAAAC
Gut_R105_SP331	CCTTTCCATGGTTCAAGTATACGCCGTGTGGCCG	Gut_R105	GTCGCACCCCGCACGGGGTGCGTGAATTGAAAC
Gut_R105_SP332	CTTTAGAGTGTGCGCAGTATATTGTAGATACTTA	Gut_R105	GTCGCACCCCGCACGGGGTGCGTGAATTGAAAC
Gut_R105_SP333	ATTGATAAGCTGTGCGACAAAATTGATGTACGCT	Gut_R105	GTCGCACCCCGCACGGGGTGCGTGAATTGAAAC
Gut_R105_SP334	TTTTGGCTTGGATAGTCTAGCGCTGTGAGTTATG	Gut_R105	GTCGCACCCCGCACGGGGTGCGTGAATTGAAAC
Gut_R105_SP335	TTATGCGCAAGGTCAAAAAAAATGTGGTTTTTCAA	Gut_R105	GTCGCACCCCGCACGGGGTGCGTGAATTGAAAC
Gut_R105_SP336	TGGATTGGCTACCAGCATCAGCGTGGAGCGTTAA	Gut_R105	GTCGCACCCCGCACGGGGTGCGTGAATTGAAAC
Gut_R105_SP337	ATCTGCTTATACTGCTTATCTGTACGAGAATCAG	Gut_R105	GTCGCACCCCGCACGGGGTGCGTGAATTGAAAC
Gut_R105_SP338	GGTGTTGAACCTCTTGATGCTAGAGTACAGATA	Gut_R105	GTCGCACCCCGCACGGGGTGCGTGAATTGAAAC
Gut_R105_SP339	GACCTTATGGGTGCCGTAGTGGCGCAGAGGTTATT	Gut_R105	GTCGCACCCCGCACGGGGTGCGTGAATTGAAAC
Gut_R105_SP34	TCTAGTGGCAAGGCGATAGTCGAGGTGCCCGGTA	Gut_R105	GTCGCACCCCGCACGGGGTGCGTGAATTGAAAC
Gut_R105_SP340	AGCGAGGAGCACTGGATCGCTAAAGATCTCAAC	Gut_R105	GTCGCACCCCGCACGGGGTGCGTGAATTGAAAC
Gut_R105_SP341	CTAGCCTGTGCCGACGCATCCAAGGGTGTCGTAG	Gut_R105	GTCGCACCCCGCACGGGGTGCGTGAATTGAAAC
Gut_R105_SP342	GACAAGGGCAAGGTACACTACCAAGGCGACGCAATCA	Gut_R105	GTCGCACCCCGCACGGGGTGCGTGAATTGAAAC
Gut_R105_SP343	GAGCAAATCATAGACTGGCGTGATGCCGTGGAG	Gut_R105	GTCGCACCCCGCACGGGGTGCGTGAATTGAAAC
Gut_R105_SP344	CACTCCAAGAGACCTCCAACGCACTGCAGAAGTG	Gut_R105	GTCGCACCCCGCACGGGGTGCGTGAATTGAAAC
Gut_R105_SP345	CAGTTAGATTAGCGTCAGACGCGCGATCAGACAAG	Gut_R105	GTCGCACCCCGCACGGGGTGCGTGAATTGAAAC
Gut_R105_SP346	CTTGAATAGTGATTCTTGCATAGTGTTAGGTTGT	Gut_R105	GTCGCACCCCGCACGGGGTGCGTGAATTGAAAC
Gut_R105_SP347	CAGCCGTTGGGAGGGAAAGCGGTGTCCCAGAAG	Gut_R105	GTCGCACCCCGCACGGGGTGCGTGAATTGAAAC
Gut_R105_SP348	TTCACACAGCTTCAGCTCCCCGACTGGAGATAC	Gut_R105	GTCGCACCCCGCACGGGGTGCGTGAATTGAAAC
Gut_R105_SP349	ACAAAGTGCGTTTTTTTTGACTCTTACGTACAATGA	Gut_R105	GTCGCACCCCGCACGGGGTGCGTGAATTGAAAC
Gut_R105_SP35	TCTAGTGGCAAGGCGATAGTGGAGGTGCCAGGCAC	Gut_R105	GTCGCACCCCGCACGGGGTGCGTGAATTGAAAC
Gut_R105_SP350	GAGTACCGCAAAGAGGATTTAGCACTCAGCACTG	Gut_R105	GTCGCACCCCGCACGGGGTGCGTGAATTGAAAC
Gut_R105_SP351	ACGTAGAGGTAGTAGTCGCTGCCTAGGTAGACGT	Gut_R105	GTCGCACCCCGCACGGGGTGCGTGAATTGAAAC
Gut_R105_SP352	CTTTAACCCGCATTTTTCTGCTCTCGGTTATCAAG	Gut_R105	GTCGCACCCCGCACGGGGTGCGTGAATTGAAAC
Gut_R105_SP353	CTAAGATAGATACGCGGTAACGTATAGGAGTGAC	Gut_R105	GTCGCACCCCGCACGGGGTGCGTGAATTGAAAC
Gut_R105_SP354	TTTGATGCGTCTTCCGTTTCACGCTTCGTCCAAG	Gut_R105	GTCGCACCCCGCACGGGGTGCGTGAATTGAAAC
Gut_R105_SP355	GTCCAGATCCTAGAATACGCAATTAAATAAGGC	Gut_R105	GTCGCACCCCGCACGGGGTGCGTGAATTGAAAC
Gut_R105_SP356	TAGCCGTTAGCTAGCTAAAAGCCAACAGCTACATT	Gut_R105	GTCGCACCCCGCACGGGGTGCGTGAATTGAAAC
Gut_R105_SP357	TCGGGACGCAATTGATCTACATAACGACTATCTA	Gut_R105	GTCGCACCCCGCACGGGGTGCGTGAATTGAAAC
Gut_R105_SP358	GCATCAGAAAGGGGAGGACAAAAGCTCCCTTGGG	Gut_R105	GTCGCACCCCGCACGGGGTGCGTGAATTGAAAC
Gut_R105_SP359	GTACTGCCCCCCGCTCAGTGATTGGTCGGAGGGCT	Gut_R105	GTCGCACCCCGCACGGGGTGCGTGAATTGAAAC
Gut_R105_SP36	CTCTGTCACGAGTATGGCGATGAGTCGTTCCGC	Gut_R105	GTCGCACCCCGCACGGGGTGCGTGAATTGAAAC
Gut_R105_SP360	CTGAGCTTGAATCTTATCCTTTTCAAGCATAGCA	Gut_R105	GTCGCACCCCGCACGGGGTGCGTGAATTGAAAC
Gut_R105_SP361	ACCTCCGTCCCCAGCGCGTCTACAAGCCTTCTGCG	Gut_R105	GTCGCACCCCGCACGGGGTGCGTGAATTGAAAC
Gut_R105_SP362	GCCCATCTTATGGGCGGTCGTACTCTGGTGGG	Gut_R105	GTCGCACCCCGCACGGGGTGCGTGAATTGAAAC
Gut_R105_SP363	AGTATGATGTATATGAGCATGGTCTTATAATTGGT	Gut_R105	GTCGCACCCCGCACGGGGTGCGTGAATTGAAAC
Gut_R105_SP364	CATCAACTCGTTTGGAGCAAGAGCTAAGCAACAA	Gut_R105	GTCGCACCCCGCACGGGGTGCGTGAATTGAAAC
Gut_R105_SP365	CAGTATTGCCCAGCGATGCTAGAGTGCGCTTGA	Gut_R105	GTCGCACCCCGCACGGGGTGCGTGAATTGAAAC
Gut_R105_SP366	TTGCGCAAAAGCAGGAAATCCTCGCCGGGTCGA	Gut_R105	GTCGCACCCCGCACGGGGTGCGTGAATTGAAAC
Gut_R105_SP367	TATCTATCGTAGTTTGTGCAGCGATAACGCTCCCC	Gut_R105	GTCGCACCCCGCACGGGGTGCGTGAATTGAAAC
Gut_R105_SP368	CCGACTGGTCGTACGAGTCGATGAAGTCCACCCCA	Gut_R105	GTCGCACCCCGCACGGGGTGCGTGAATTGAAAC
Gut_R105_SP369	TCTAAGTCAGTAACTGAAATCTCATACGGACGAGA	Gut_R105	GTCGCACCCCGCACGGGGTGCGTGAATTGAAAC
Gut_R105_SP37	CTCTGTCACGAGTATGGCGATGAGTCGTTCCGCCGT	Gut_R105	GTCGCACCCCGCACGGGGTGCGTGAATTGAAAC
Gut_R105_SP370	TCTTATTAAAAAGATTAGTGGCGAAGTAGTTACC	Gut_R105	GTCGCACCCCGCACGGGGTGCGTGAATTGAAAC
Gut_R105_SP371	GTGGTTGCCTGCTTGCTGGTATATCCTCTTATT	Gut_R105	GTCGCACCCCGCACGGGGTGCGTGAATTGAAAC
Gut_R105_SP372	CATCTAGTGCATCTCTTAGCCACTCCTCGTAGAT	Gut_R105	GTCGCACCCCGCACGGGGTGCGTGAATTGAAAC
Gut_R105_SP373	TTGTTACTTGTTACTTGTGCTTGCCAGCCCTCCC	Gut_R105	GTCGCACCCCGCACGGGGTGCGTGAATTGAAAC
Gut_R105_SP374	ACGAGATAAGCTACGCCAACCTCATACTCCTCTC	Gut_R105	GTCGCACCCCGCACGGGGTGCGTGAATTGAAAC
Gut_R105_SP375	TTGGAAGAGGCGGTAGACCTCGTCGTAGTTACCA	Gut_R105	GTCGCACCCCGCACGGGGTGCGTGAATTGAAAC
Gut_R105_SP376	TTTCCTGCTCCGTCTAGGCGGAAGACGTTACAGCT	Gut_R105	GTCGCACCCCGCACGGGGTGCGTGAATTGAAAC
Gut_R105_SP377	TCCTTAGAAATATCACGCGACAGATGCCAATAATT	Gut_R105	GTCGCACCCCGCACGGGGTGCGTGAATTGAAAC
Gut_R105_SP38	AGTCTTCGGAGGAAGCGAAAGTGTTTTTATAAA	Gut_R105	GTCGCACCCCGCACGGGGTGCGTGAATTGAAAC
Gut_R105_SP39	TTTGATAATCTTGTAACGATCAGCTTGAGACATTT	Gut_R105	GTCGCACCCCGCACGGGGTGCGTGAATTGAAAC
Gut_R105_SP4	TCAAAGGGAACGCCTATCTCCTCCCCCATTGGCG	Gut_R105	GTCGCACCCCGCACGGGGTGCGTGAATTGAAAC
Gut_R105_SP40	GTCGGGCGTCAGGTCGCAGGCTAGATCGTCCACC	Gut_R105	GTCGCACCCCGCACGGGGTGCGTGAATTGAAAC
Gut_R105_SP41	GTTACTATATTCGATGTATATAGTATCGTAATTA	Gut_R105	GTCGCACCCCGCACGGGGTGCGTGAATTGAAAC
Gut_R105_SP42	GTTACGTGTTGGCGGTAAGTATGTTAATTATATC	Gut_R105	GTCGCACCCCGCACGGGGTGCGTGAATTGAAAC
Gut_R105_SP43	CTCCTAGGACTACTCATCGGCTACCTCACCGGC	Gut_R105	GTCGCACCCCGCACGGGGTGCGTGAATTGAAAC
Gut_R105_SP44	GCAAAACGAAAAGTACAATCCTACAAAACGAAAA	Gut_R105	GTCGCACCCCGCACGGGGTGCGTGAATTGAAAC
Gut_R105_SP45	TCCGCGTTAGGATATCAGGAGATAGAGGATCGC	Gut_R105	GTCGCACCCCGCACGGGGTGCGTGAATTGAAAC
Gut_R105_SP46	GGCGTACACCCCGAGATGGTGTTTGTCAGCGGT	Gut_R105	GTCGCACCCCGCACGGGGTGCGTGAATTGAAAC
Gut_R105_SP47	TGTGCGAGAACCTCCAGCGCACCAGCCGTCTCTT	Gut_R105	GTCGCACCCCGCACGGGGTGCGTGAATTGAAAC
Gut_R105_SP48	ATCTGTACGAGCATCAGACCAAGCATTATTAAT	Gut_R105	GTCGCACCCCGCACGGGGTGCGTGAATTGAAAC
Gut_R105_SP49	ACCACAGCGCAAGGGGTTGTCACCCCGTCTGCAA	Gut_R105	GTCGCACCCCGCACGGGGTGCGTGAATTGAAAC
Gut_R105_SP5	TAAACCCTAAGACGGGAAAATTTATCAAAGTGC	Gut_R105	GTCGCACCCCGCACGGGGTGCGTGAATTGAAAC
Gut_R105_SP50	CTCCTCGTCTATAACTATCGTAATTTGCACGATGC	Gut_R105	GTCGCACCCCGCACGGGGTGCGTGAATTGAAAC
Gut_R105_SP51	AGTCCATCTCGTGTCATAGTCTCTAACTTCTAAA	Gut_R105	GTCGCACCCCGCACGGGGTGCGTGAATTGAAAC
Gut_R105_SP52	AGGTATAGCTAAATATTTGTCTATCCCTGCTACTTA	Gut_R105	GTCGCACCCCGCACGGGGTGCGTGAATTGAAAC
Gut_R105_SP53	TTGAACTTGTCGAAGTTTACTTGCGATAGGTAGTT	Gut_R105	GTCGCACCCCGCACGGGGTGCGTGAATTGAAAC
Gut_R105_SP54	CGTGATACGGAAGACCTAACAACGATTCATCGT	Gut_R105	GTCGCACCCCGCACGGGGTGCGTGAATTGAAAC
Gut_R105_SP55	GATAATGTTAAGAATCAAGTGTTATGCGCTTCT	Gut_R105	GTCGCACCCCGCACGGGGTGCGTGAATTGAAAC
Gut_R105_SP56	ATGGTGTGGGGGCTGTTGGCTCTTGGCTGTTAGC	Gut_R105	GTCGCACCCCGCACGGGGTGCGTGAATTGAAAC
Gut_R105_SP57	GTGAATCTCAATGATAGTATTTCTATCCAAATCA	Gut_R105	GTCGCACCCCGCACGGGGTGCGTGAATTGAAAC
Gut_R105_SP58	GGCTATTGCCATTGCCCCCACCTCAAAAGAGGGGAG	Gut_R105	GTCGCACCCCGCACGGGGTGCGTGAATTGAAAC
Gut_R105_SP59	GGTTGTCGTCTTGTTACCTCATTGCTCGCAGTGCC	Gut_R105	GTCGCACCCCGCACGGGGTGCGTGAATTGAAAC
Gut_R105_SP6	GTCCACGCTGTCTTGGCTGGCGGTCGCTATGCC	Gut_R105	GTCGCACCCCGCACGGGGTGCGTGAATTGAAAC
Gut_R105_SP60	GAATTTGACTCAGACCCCGACAGCCAGGCCGTCA	Gut_R105	GTCGCACCCCGCACGGGGTGCGTGAATTGAAAC
Gut_R105_SP61	TTCGGTGTCGAACCCTTGGACGCTAGAGTTCAAAT	Gut_R105	GTCGCACCCCGCACGGGGTGCGTGAATTGAAAC
Gut_R105_SP62	GACCTCCATCACTACGACATACAGCTCGACAGC	Gut_R105	GTCGCACCCCGCACGGGGTGCGTGAATTGAAAC
Gut_R105_SP63	CAGGTGATAAATACCGTGTGCAGTCTAGTACGCTT	Gut_R105	GTCGCACCCCGCACGGGGTGCGTGAATTGAAAC
Gut_R105_SP64	CTAGCGGGGCAACTCAGAGTGACGCCAGACTGGGC	Gut_R105	GTCGCACCCCGCACGGGGTGCGTGAATTGAAAC
Gut_R105_SP65	TCGTGGGACGATAACGCACGTCCCGCACACCGCA	Gut_R105	GTCGCACCCCGCACGGGGTGCGTGAATTGAAAC
Gut_R105_SP66	TTAGGGGTTGCTTGGTGCCTTGAAATTGCTGTCG	Gut_R105	GTCGCACCCCGCACGGGGTGCGTGAATTGAAAC
Gut_R105_SP67	TCTTTACTTATATCCCTAGACATATGCCAATAATCA	Gut_R105	GTCGCACCCCGCACGGGGTGCGTGAATTGAAAC
Gut_R105_SP68	ATGTGACTGGGATTTACGCTCTACCTGCTCCTCCT	Gut_R105	GTCGCACCCCGCACGGGGTGCGTGAATTGAAAC
Gut_R105_SP69	AGCGCCTACGTAACGGACGCAACAGCCGAGCAGGC	Gut_R105	GTCGCACCCCGCACGGGGTGCGTGAATTGAAAC
Gut_R105_SP7	TTCTGCACTCTCACGTACAACGATGAATCGTTGTTA	Gut_R105	GTCGCACCCCGCACGGGGTGCGTGAATTGAAAC
Gut_R105_SP70	ATCAGCGACGGCAAGCTACCACAGAGCAAGCCACA	Gut_R105	GTCGCACCCCGCACGGGGTGCGTGAATTGAAAC
Gut_R105_SP71	TGTGCGGTCTCGGTCGTCTCTTGGAGCTTGTCCG	Gut_R105	GTCGCACCCCGCACGGGGTGCGTGAATTGAAAC
Gut_R105_SP72	TTAAGGTAGTACTCAACTATATATCGATGTTGAA	Gut_R105	GTCGCACCCCGCACGGGGTGCGTGAATTGAAAC
Gut_R105_SP73	CTGCCTCGCTTGGCGTTTGTCGTAGCTCCTTAAGGT	Gut_R105	GTCGCACCCCGCACGGGGTGCGTGAATTGAAAC
Gut_R105_SP74	TCTGCCTCGCTTGGCGTTTGTCGTAGCTCCTTAAGGT	Gut_R105	GTCGCACCCCGCACGGGGTGCGTGAATTGAAAC
Gut_R105_SP75	TTAAGGTAATACTCAACGATATAGCGATTCTGGAG	Gut_R105	GTCGCACCCCGCACGGGGTGCGTGAATTGAAAC
Gut_R105_SP76	GTTTGCTCTACCTCGTATATACCTGCGTAAGTTGGT	Gut_R105	GTCGCACCCCGCACGGGGTGCGTGAATTGAAAC
Gut_R105_SP77	AACCGTATTGCGAAACATCCAAGATGATCGTTTGT	Gut_R105	GTCGCACCCCGCACGGGGTGCGTGAATTGAAAC
Gut_R105_SP78	AGTAGCAGGTTACGTCCTCCAACTCGGGGGGTG	Gut_R105	GTCGCACCCCGCACGGGGTGCGTGAATTGAAAC
Gut_R105_SP79	GCTCATCAAAGGCGGAGTTGTCCACGGGAACGCA	Gut_R105	GTCGCACCCCGCACGGGGTGCGTGAATTGAAAC
Gut_R105_SP8	GCTGACTGGAGCCGAGCCACCGAGACGCTACGAG	Gut_R105	GTCGCACCCCGCACGGGGTGCGTGAATTGAAAC
Gut_R105_SP80	TTGTTATTAGCGCGGATGATTTGAGACTTTCTGTC	Gut_R105	GTCGCACCCCGCACGGGGTGCGTGAATTGAAAC
Gut_R105_SP81	CTTAAAAGCTCCCACACCATGCAGAGAGCGGTCA	Gut_R105	GTCGCACCCCGCACGGGGTGCGTGAATTGAAAC
Gut_R105_SP82	TACCCCGACCGCATCGACCTCGGTAAGGTCACGGT	Gut_R105	GTCGCACCCCGCACGGGGTGCGTGAATTGAAAC
Gut_R105_SP83	TTCTTGCCCCGCTTGATCCTCTGCACGGCTTCGG	Gut_R105	GTCGCACCCCGCACGGGGTGCGTGAATTGAAAC
Gut_R105_SP84	TCTTGCTTGTGCTTTCTGGGTTATTGTGACATTGACG	Gut_R105	GTCGCACCCCGCACGGGGTGCGTGAATTGAAAC
Gut_R105_SP85	GTCCTCCTGCTTCTTCGCTTCGGCCTGCTCCTGCAGC	Gut_R105	GTCGCACCCCGCACGGGGTGCGTGAATTGAAAC
Gut_R105_SP86	TAGCTATTGGCTGTTGGCTAGCTAACGGCTAAGGG	Gut_R105	GTCGCACCCCGCACGGGGTGCGTGAATTGAAAC
Gut_R105_SP87	GGTTGTCGTTGCGCTTGTTGCGCTGTCCTTTGCA	Gut_R105	GTCGCACCCCGCACGGGGTGCGTGAATTGAAAC
Gut_R105_SP88	ATCTCCTCCTCCTTGGCTACCTGCCAGCCCCCCTTG	Gut_R105	GTCGCACCCCGCACGGGGTGCGTGAATTGAAAC
Gut_R105_SP89	AACTGTATTACGAAACATCCAAGATGATCGCTTA	Gut_R105	GTCGCACCCCGCACGGGGTGCGTGAATTGAAAC
Gut_R105_SP9	TCGTACAAATAAACAGTATAGGCAGATGAATGAGA	Gut_R105	GTCGCACCCCGCACGGGGTGCGTGAATTGAAAC
Gut_R105_SP90	ATCGTGGAGACGTGCGAGGGGTATATCTCCTCGT	Gut_R105	GTCGCACCCCGCACGGGGTGCGTGAATTGAAAC
Gut_R105_SP91	TGCTGTACTCAATGTGGCACGTTGAACAAGGTTGG	Gut_R105	GTCGCACCCCGCACGGGGTGCGTGAATTGAAAC
Gut_R105_SP92	GTCCGCATCAGCTACCAACGTCACTGCGACTATCT	Gut_R105	GTCGCACCCCGCACGGGGTGCGTGAATTGAAAC
Gut_R105_SP93	ATATTAATGGGTGCGGGGGCTGAAGGCTTGTCCT	Gut_R105	GTCGCACCCCGCACGGGGTGCGTGAATTGAAAC
Gut_R105_SP94	ATCATAACGAGGCACATAACCGAAAACACTATCT	Gut_R105	GTCGCACCCCGCACGGGGTGCGTGAATTGAAAC
Gut_R105_SP95	ATCCTTAGGACGAGCAACATCGAGTTCACGCGC	Gut_R105	GTCGCACCCCGCACGGGGTGCGTGAATTGAAAC
Gut_R105_SP96	CGTGAGCGTTTGTTACGTGTTGGCGGTAAGTATGT	Gut_R105	GTCGCACCCCGCACGGGGTGCGTGAATTGAAAC
Gut_R105_SP97	CGTAATGTCAAGGTCTCAGGTCGCTCAGTGGATTA	Gut_R105	GTCGCACCCCGCACGGGGTGCGTGAATTGAAAC
Gut_R105_SP98	TTATATAGACTTTGTGGCTCAGCTTATCAATGAA	Gut_R105	GTCGCACCCCGCACGGGGTGCGTGAATTGAAAC
Gut_R105_SP99	GCTCGCTTGCGTCGTTTCCGCATTCCTGTAATCC	Gut_R105	GTCGCACCCCGCACGGGGTGCGTGAATTGAAAC
Gut_R1050_SP1	CAAAGTATTATCGTAGCATTGGCTATAATGCT	Gut_R1050	AATTTCAATCCACACGGCCCGCAAGCCGTGAC
Gut_R1050_SP2	ATCCTTATGCTGGACTGACGACCGAAGAATTA	Gut_R1050	AATTTCAATCCACACGGCCCGCAAGCCGTGAC
Gut_R1050_SP3	ATTTCCCCGTATACCTTCGCTCTGTTGTAATGC	Gut_R1050	AATTTCAATCCACACGGCCCGCAAGCCGTGAC
Gut_R1050_SP4	GTGGAACTTGGGTCCTTTATGCAGAGTATCAG	Gut_R1050	AATTTCAATCCACACGGCCCGCAAGCCGTGAC
Gut_R1051_SP1	GGTCTGAGCTGAAGGCGGCGGACTTCTCG	Gut_R1051	AAATTTCAATCCACACGGCCCGCAAGCCGTGACGT
Gut_R1051_SP2	GGAACTTGGGTCCTTTATGCAGAGTATCA	Gut_R1051	AAATTTCAATCCACACGGCCCGCAAGCCGTGACGT
Gut_R1051_SP3	CCTTATGCTGGACTGACGACCGAAGAATT	Gut_R1051	AAATTTCAATCCACACGGCCCGCAAGCCGTGACGT
Gut_R1051_SP4	CCCGCAAAAATGGCTGATTCACGGCTTTTTC	Gut_R1051	AAATTTCAATCCACACGGCCCGCAAGCCGTGACGT
Gut_R1052_SP1	GATGTAGGCTCGTGCTATCTCAATACCAGAA	Gut_R1052	AACCGTCGAGGCTTTCACGGCCTCGTGGATTGAAAT
Gut_R1052_SP2	ATTACAAACCTTTAACAATATGTTAAATGGT	Gut_R1052	AACCGTCGAGGCTTTCACGGCCTCGTGGATTGAAAT
Gut_R1052_SP3	CATCCTGTATGAGCCCATCAAAAATGCTTGA	Gut_R1052	AACCGTCGAGGCTTTCACGGCCTCGTGGATTGAAAT
Gut_R1052_SP4	CCCACCGCCAGAAGGAAGAGATGCCAGGA	Gut_R1052	AACCGTCGAGGCTTTCACGGCCTCGTGGATTGAAAT
Gut_R1052_SP5	ATCTCAGGGCACTTTTTTTTAGCGTTACTT	Gut_R1052	AACCGTCGAGGCTTTCACGGCCTCGTGGATTGAAAT
Gut_R1052_SP6	CTCTTCCATTTTCCCGGCGCATCCTCCCG	Gut_R1052	AACCGTCGAGGCTTTCACGGCCTCGTGGATTGAAAT
Gut_R1052_SP7	TCTGTGTGCTTTGTAATATACGCCTCACGC	Gut_R1052	AACCGTCGAGGCTTTCACGGCCTCGTGGATTGAAAT
Gut_R1053_SP1	ATCCAGTGACGCTTTATCCCGCATTTTGGTA	Gut_R1053	AGCGTCGAGGCTTTCACGGCCTCGTGGATTGAAAT
Gut_R1053_SP2	TATTCCAGTCCGATAGAGTTCTCCAGGAATGG	Gut_R1053	AGCGTCGAGGCTTTCACGGCCTCGTGGATTGAAAT
Gut_R1053_SP3	TCTGTGTGCTTTGTAATATACGCCTCACGCT	Gut_R1053	AGCGTCGAGGCTTTCACGGCCTCGTGGATTGAAAT
Gut_R1053_SP4	GATGTAGGCTCGTGCTATCTCAATACCAGAAA	Gut_R1053	AGCGTCGAGGCTTTCACGGCCTCGTGGATTGAAAT
Gut_R1053_SP5	ATTACAAACCTTTAACAATATGTTAAATGGTA	Gut_R1053	AGCGTCGAGGCTTTCACGGCCTCGTGGATTGAAAT
Gut_R1053_SP6	CATCCTGTATGAGCCCATCAAAAATGCTTGAC	Gut_R1053	AGCGTCGAGGCTTTCACGGCCTCGTGGATTGAAAT
Gut_R1054_SP1	TCGTGAGGCAGACGGCA	Gut_R1054	TGCGCGACCGTGCCTTTTGCAAAAAAACGTCAAAGGCACGGTCGAAA
Gut_R1054_SP2	AGTGCGCCCAGACGGTT	Gut_R1054	TGCGCGACCGTGCCTTTTGCAAAAAAACGTCAAAGGCACGGTCGAAA
Gut_R1054_SP3	AGTGCACCCAGATGGGT	Gut_R1054	TGCGCGACCGTGCCTTTTGCAAAAAAACGTCAAAGGCACGGTCGAAA
Gut_R1054_SP4	TCGGAGCTTGAGGGTCG	Gut_R1054	TGCGCGACCGTGCCTTTTGCAAAAAAACGTCAAAGGCACGGTCGAAA
Gut_R1054_SP5	AGCGGGGGCGAGGGTCG	Gut_R1054	TGCGCGACCGTGCCTTTTGCAAAAAAACGTCAAAGGCACGGTCGAAA
Gut_R1054_SP6	AGCGGAGGCGAGGGTCG	Gut_R1054	TGCGCGACCGTGCCTTTTGCAAAAAAACGTCAAAGGCACGGTCGAAA
Gut_R1054_SP7	CCGGAGCGAAGAGGTCG	Gut_R1054	TGCGCGACCGTGCCTTTTGCAAAAAAACGTCAAAGGCACGGTCGAAA
Gut_R1055_SP1	CATCCAATGTGGTTAGTTGATTGTAGTA	Gut_R1055	GCACCCAAGCTTTGTCAACGCGGTGTTGTGGGAGA
Gut_R1055_SP2	GATCCAATGCGGTCAGTTGATTGTCTTT	Gut_R1055	GCACCCAAGCTTTGTCAACGCGGTGTTGTGGGAGA
Gut_R1055_SP3	TATCCAATGTGGTCAGCTGATTGTATTT	Gut_R1055	GCACCCAAGCTTTGTCAACGCGGTGTTGTGGGAGA
Gut_R1056_SP1	CTGTAATAAAAGCGACAGTGGAAAATTCGGCTATAA	Gut_R1056	ATTTCAAAACATCATATGTTGATATTAAAC
Gut_R1056_SP2	GAATGATTCACTTAGTCGTTCACGTCAATCTCTTAT	Gut_R1056	ATTTCAAAACATCATATGTTGATATTAAAC
Gut_R1056_SP3	AATGAAGAAACGTAATTATAACTGTATGTCTATTAA	Gut_R1056	ATTTCAAAACATCATATGTTGATATTAAAC
Gut_R1057_SP1	GCCACAAGGTGGTGGACGATTACCGCCTT	Gut_R1057	GTTTGAGACGGATTGGATATGACACTACTCTCAAAC
Gut_R1057_SP10	TTAGTAACTGATAGTCTCTCTATATCTATA	Gut_R1057	GTTTGAGACGGATTGGATATGACACTACTCTCAAAC
Gut_R1057_SP11	TAGCAACGTACATCACCCATGAAAAAATAC	Gut_R1057	GTTTGAGACGGATTGGATATGACACTACTCTCAAAC
Gut_R1057_SP12	TGGATATGGGAACGGGTAAGACCTTAACGG	Gut_R1057	GTTTGAGACGGATTGGATATGACACTACTCTCAAAC
Gut_R1057_SP13	TGGACATGGGAACGGGTAAGACCTTAACGG	Gut_R1057	GTTTGAGACGGATTGGATATGACACTACTCTCAAAC
Gut_R1057_SP14	TACACCGACGATCACCTCTCTCTCCGCGTC	Gut_R1057	GTTTGAGACGGATTGGATATGACACTACTCTCAAAC
Gut_R1057_SP15	GCGAAAGCGGCTCCGGTGACGTTGACGGCG	Gut_R1057	GTTTGAGACGGATTGGATATGACACTACTCTCAAAC
Gut_R1057_SP16	TGATGTTTTTAAGCGAAGGAGCGGCAAAAG	Gut_R1057	GTTTGAGACGGATTGGATATGACACTACTCTCAAAC
Gut_R1057_SP17	AAGGAGCGTAAATCGTGAATAAAGCAATCA	Gut_R1057	GTTTGAGACGGATTGGATATGACACTACTCTCAAAC
Gut_R1057_SP18	TCGCGCACCGGCTTTGACGGCTTCATTAGC	Gut_R1057	GTTTGAGACGGATTGGATATGACACTACTCTCAAAC
Gut_R1057_SP19	CGCCGTTCGCTCATGTACTCCATTAGCAAT	Gut_R1057	GTTTGAGACGGATTGGATATGACACTACTCTCAAAC
Gut_R1057_SP2	ACCGAAGATGTGTCTACCATTTTGAAAGTG	Gut_R1057	GTTTGAGACGGATTGGATATGACACTACTCTCAAAC
Gut_R1057_SP20	TCGACTACCGCCATATCGAACGGCCAGCGC	Gut_R1057	GTTTGAGACGGATTGGATATGACACTACTCTCAAAC
Gut_R1057_SP21	TGCGTGTAGTTATTGTCATTTTTCCATTTA	Gut_R1057	GTTTGAGACGGATTGGATATGACACTACTCTCAAAC
Gut_R1057_SP22	GGTCAGCGGCCGCACTCGTTTATCGTTGCA	Gut_R1057	GTTTGAGACGGATTGGATATGACACTACTCTCAAAC
Gut_R1057_SP23	TTGCGCAGGATCATATCGATCGTTGCGGAG	Gut_R1057	GTTTGAGACGGATTGGATATGACACTACTCTCAAAC
Gut_R1057_SP24	TCTCCGGATGAAGAAGAAAGGCTGGGTCGA	Gut_R1057	GTTTGAGACGGATTGGATATGACACTACTCTCAAAC
Gut_R1057_SP25	CACTAACATCGTATCACAACTTTAAGTCTC	Gut_R1057	GTTTGAGACGGATTGGATATGACACTACTCTCAAAC
Gut_R1057_SP26	TTAATAAGGCAGGTGTTCAGGACAACAAGG	Gut_R1057	GTTTGAGACGGATTGGATATGACACTACTCTCAAAC
Gut_R1057_SP27	AAACACGTGTTGAGTAAAGAGGAACGGAAC	Gut_R1057	GTTTGAGACGGATTGGATATGACACTACTCTCAAAC
Gut_R1057_SP28	TAATGGATTTACCTTCACAAAGATTCATTA	Gut_R1057	GTTTGAGACGGATTGGATATGACACTACTCTCAAAC
Gut_R1057_SP29	AAGAATTCGCTACGTACGTAGACGTTGACG	Gut_R1057	GTTTGAGACGGATTGGATATGACACTACTCTCAAAC
Gut_R1057_SP3	TTCGTGTACAAGCGTGGAGAGGATTGCGTT	Gut_R1057	GTTTGAGACGGATTGGATATGACACTACTCTCAAAC
Gut_R1057_SP30	TCACTGTATCTTTGCTTGATCTGACAGTG	Gut_R1057	GTTTGAGACGGATTGGATATGACACTACTCTCAAAC
Gut_R1057_SP31	ACATTCACTTGATAGTGATCCGTGTTATAG	Gut_R1057	GTTTGAGACGGATTGGATATGACACTACTCTCAAAC
Gut_R1057_SP32	AGCGACATGTGAGTATGCAGCAGACGTTTC	Gut_R1057	GTTTGAGACGGATTGGATATGACACTACTCTCAAAC
Gut_R1057_SP33	ATGGGGCGAATTCTATGGTTAAAGAGATAA	Gut_R1057	GTTTGAGACGGATTGGATATGACACTACTCTCAAAC
Gut_R1057_SP34	GCAGGACTACTGAAACTCATTCACTGGCTC	Gut_R1057	GTTTGAGACGGATTGGATATGACACTACTCTCAAAC
Gut_R1057_SP35	GGTTAAGACGCGCACCATTACTCTTAAAAA	Gut_R1057	GTTTGAGACGGATTGGATATGACACTACTCTCAAAC
Gut_R1057_SP36	ATGGTTGATCCTCCCTAAATCCGCTAATTA	Gut_R1057	GTTTGAGACGGATTGGATATGACACTACTCTCAAAC
Gut_R1057_SP37	GTTCCGCGCGCCATCGTGTTAAATGAGTT	Gut_R1057	GTTTGAGACGGATTGGATATGACACTACTCTCAAAC
Gut_R1057_SP38	TTGATTTCCCAAATCGAAGAGGGAGACGTG	Gut_R1057	GTTTGAGACGGATTGGATATGACACTACTCTCAAAC
Gut_R1057_SP39	CACGACAGCAACGCGCGAAATAGCGAAAAG	Gut_R1057	GTTTGAGACGGATTGGATATGACACTACTCTCAAAC
Gut_R1057_SP4	GCGTGTACAAGCTTGGGTTCGAGTGCGTTT	Gut_R1057	GTTTGAGACGGATTGGATATGACACTACTCTCAAAC
Gut_R1057_SP40	TGCGCGGGCGTATTTGCTGATGCTTTGATG	Gut_R1057	GTTTGAGACGGATTGGATATGACACTACTCTCAAAC
Gut_R1057_SP41	AGGAGATGGGTCAAGACATACAAGAATTGA	Gut_R1057	GTTTGAGACGGATTGGATATGACACTACTCTCAAAC
Gut_R1057_SP42	TTATTTTGTGATTGTTTTCGTGGTCAAAA	Gut_R1057	GTTTGAGACGGATTGGATATGACACTACTCTCAAAC
Gut_R1057_SP5	GCGCTTTTTGCTTACTTTGCTTTTCACCGA	Gut_R1057	GTTTGAGACGGATTGGATATGACACTACTCTCAAAC
Gut_R1057_SP6	ATTGTCAACTCAACCCCTTTCTACTCCGCC	Gut_R1057	GTTTGAGACGGATTGGATATGACACTACTCTCAAAC
Gut_R1057_SP7	GTACCGTTCACGTTGTACACTTTTGTTTCA	Gut_R1057	GTTTGAGACGGATTGGATATGACACTACTCTCAAAC
Gut_R1057_SP8	ATAAAACCGGCTTATGTTTAACGACGCGGA	Gut_R1057	GTTTGAGACGGATTGGATATGACACTACTCTCAAAC
Gut_R1057_SP9	CGCTTGGCGATCATGTCCCACATATCGCCC	Gut_R1057	GTTTGAGACGGATTGGATATGACACTACTCTCAAAC
Gut_R1058_SP1	ACGGACTATGCCCTCTACCTATTAACCTT	Gut_R1058	GTTTGAGAGTAGTGTCATATCCAATCCATCTCAAAC
Gut_R1058_SP10	TCGTCCGGAGTTAGTTCAATTACTCCGTTA	Gut_R1058	GTTTGAGAGTAGTGTCATATCCAATCCATCTCAAAC
Gut_R1058_SP100	CCAATCAGGAGTTGACCTCCATCCGATCTA	Gut_R1058	GTTTGAGAGTAGTGTCATATCCAATCCATCTCAAAC
Gut_R1058_SP101	CAAGCTGATTGCAGATGAACTAAAAGCATT	Gut_R1058	GTTTGAGAGTAGTGTCATATCCAATCCATCTCAAAC
Gut_R1058_SP102	ATTAGCAATGTCACGCACTTCCTGCATTAA	Gut_R1058	GTTTGAGAGTAGTGTCATATCCAATCCATCTCAAAC
Gut_R1058_SP103	GTCAATACATCCAACTTATATGTAGCACG	Gut_R1058	GTTTGAGAGTAGTGTCATATCCAATCCATCTCAAAC
Gut_R1058_SP104	ACCTCATCAAGAGTTAGACCAACTTGTATT	Gut_R1058	GTTTGAGAGTAGTGTCATATCCAATCCATCTCAAAC
Gut_R1058_SP105	TACTGACTTGACTGTTCCTAATCCAGTCAT	Gut_R1058	GTTTGAGAGTAGTGTCATATCCAATCCATCTCAAAC
Gut_R1058_SP106	ATGGTGAATACGTACTGCGCTCGTCGGCGG	Gut_R1058	GTTTGAGAGTAGTGTCATATCCAATCCATCTCAAAC
Gut_R1058_SP107	CCGGCACCGGAGCGGAGACCCACGGCATCC	Gut_R1058	GTTTGAGAGTAGTGTCATATCCAATCCATCTCAAAC
Gut_R1058_SP11	TGCGTATGATTCACGAGCGAAATGCCGTTC	Gut_R1058	GTTTGAGAGTAGTGTCATATCCAATCCATCTCAAAC
Gut_R1058_SP12	ATGTTGAGCGGCGCACTACTCGACGCGGAA	Gut_R1058	GTTTGAGAGTAGTGTCATATCCAATCCATCTCAAAC
Gut_R1058_SP13	GCGTGAACGTTCACGTGACCTATACTACGG	Gut_R1058	GTTTGAGAGTAGTGTCATATCCAATCCATCTCAAAC
Gut_R1058_SP14	AGGTATTCAAGGCGTTAAGGGTGATCCGGG	Gut_R1058	GTTTGAGAGTAGTGTCATATCCAATCCATCTCAAAC
Gut_R1058_SP15	ACGTTGCTCGCCCATCATTTGAGGTACTGA	Gut_R1058	GTTTGAGAGTAGTGTCATATCCAATCCATCTCAAAC
Gut_R1058_SP16	GCGCCGCTCTTCGATTGACGGATCCATACT	Gut_R1058	GTTTGAGAGTAGTGTCATATCCAATCCATCTCAAAC
Gut_R1058_SP17	CACAGGGACTATTTTAATAAGTCATACGGA	Gut_R1058	GTTTGAGAGTAGTGTCATATCCAATCCATCTCAAAC
Gut_R1058_SP18	ACGGTAGGTTAAGAGTGAGGATGGGAGTGT	Gut_R1058	GTTTGAGAGTAGTGTCATATCCAATCCATCTCAAAC
Gut_R1058_SP19	GATATTAGCCTAAAGGCGTGGCCGCTAACG	Gut_R1058	GTTTGAGAGTAGTGTCATATCCAATCCATCTCAAAC
Gut_R1058_SP2	CAATATTTGGTGGATACCAACATCGGCAAA	Gut_R1058	GTTTGAGAGTAGTGTCATATCCAATCCATCTCAAAC
Gut_R1058_SP20	GGTATTCACGGAGTAGTGGATTTCTAAAAG	Gut_R1058	GTTTGAGAGTAGTGTCATATCCAATCCATCTCAAAC
Gut_R1058_SP21	AATCGACCAATCCCGAGAATCACGCTGTGC	Gut_R1058	GTTTGAGAGTAGTGTCATATCCAATCCATCTCAAAC
Gut_R1058_SP22	AGTCCAGCTTGAAGGTGTACCGATTTCTGC	Gut_R1058	GTTTGAGAGTAGTGTCATATCCAATCCATCTCAAAC
Gut_R1058_SP23	TTGAGCAAAAAAGGCAACGCGGCAAAACA	Gut_R1058	GTTTGAGAGTAGTGTCATATCCAATCCATCTCAAAC
Gut_R1058_SP24	ACGCCGTGACCTCGATATGCTGTTCACGGT	Gut_R1058	GTTTGAGAGTAGTGTCATATCCAATCCATCTCAAAC
Gut_R1058_SP25	TCATCAAGTGTCATGGCTTTTCCTTAATAG	Gut_R1058	GTTTGAGAGTAGTGTCATATCCAATCCATCTCAAAC
Gut_R1058_SP26	TTGAGGGCACGACGCTAAACGGATCAACGC	Gut_R1058	GTTTGAGAGTAGTGTCATATCCAATCCATCTCAAAC
Gut_R1058_SP27	AATAGAAGATTTCTACGCCTCCTGTGTAGA	Gut_R1058	GTTTGAGAGTAGTGTCATATCCAATCCATCTCAAAC
Gut_R1058_SP28	CTTCACTCTCAAGAAGTTCTGCCAATGCGC	Gut_R1058	GTTTGAGAGTAGTGTCATATCCAATCCATCTCAAAC
Gut_R1058_SP29	TAAGTATCAAGCATAGCCCGCTCTTGTATG	Gut_R1058	GTTTGAGAGTAGTGTCATATCCAATCCATCTCAAAC
Gut_R1058_SP3	AACGGCGCGTTTATCTTCCTGATGTAGTC	Gut_R1058	GTTTGAGAGTAGTGTCATATCCAATCCATCTCAAAC
Gut_R1058_SP30	CTTCTACTCTCCCACTACCGCCAACGCCAT	Gut_R1058	GTTTGAGAGTAGTGTCATATCCAATCCATCTCAAAC
Gut_R1058_SP31	CCCCGGAAGCTCCAAAAGGCGTTCATACGG	Gut_R1058	GTTTGAGAGTAGTGTCATATCCAATCCATCTCAAAC
Gut_R1058_SP32	AACGCACTCGTCCCCACGCTTGTACACGCA	Gut_R1058	GTTTGAGAGTAGTGTCATATCCAATCCATCTCAAAC
Gut_R1058_SP33	CCGGGAAATACCGTTTCGCTACAAAGGCAA	Gut_R1058	GTTTGAGAGTAGTGTCATATCCAATCCATCTCAAAC
Gut_R1058_SP34	TTTTTTATTGGAGCAAATTATGTTGAAAGA	Gut_R1058	GTTTGAGAGTAGTGTCATATCCAATCCATCTCAAAC
Gut_R1058_SP35	TTCGTCCGTCCTGATCATTTCCCTATATCC	Gut_R1058	GTTTGAGAGTAGTGTCATATCCAATCCATCTCAAAC
Gut_R1058_SP36	GTCAGGCCGCATCTGGCTAATCACAAGAGA	Gut_R1058	GTTTGAGAGTAGTGTCATATCCAATCCATCTCAAAC
Gut_R1058_SP37	AGCCCTCATCGGCGAAATGTTGCGCAAGTT	Gut_R1058	GTTTGAGAGTAGTGTCATATCCAATCCATCTCAAAC
Gut_R1058_SP38	CTTGCGCCTTGCTTCTCCGGCTCTACAACA	Gut_R1058	GTTTGAGAGTAGTGTCATATCCAATCCATCTCAAAC
Gut_R1058_SP39	TAAGGCTTGAATGGCGGTCTGTGAATCCAT	Gut_R1058	GTTTGAGAGTAGTGTCATATCCAATCCATCTCAAAC
Gut_R1058_SP4	TAGTCGCGTTATTAGCGTCACGAACAAGGA	Gut_R1058	GTTTGAGAGTAGTGTCATATCCAATCCATCTCAAAC
Gut_R1058_SP40	CGCTCCGGCGTTGATGTCGACTCTCGTATT	Gut_R1058	GTTTGAGAGTAGTGTCATATCCAATCCATCTCAAAC
Gut_R1058_SP41	GCTATAATTTAGTTATGCGTGGGCACTCTG	Gut_R1058	GTTTGAGAGTAGTGTCATATCCAATCCATCTCAAAC
Gut_R1058_SP42	TATGAATTGACGGAAATGTACAAAGGGCTA	Gut_R1058	GTTTGAGAGTAGTGTCATATCCAATCCATCTCAAAC
Gut_R1058_SP43	GTTACGATTATCGAATATTTCATTGCCGAT	Gut_R1058	GTTTGAGAGTAGTGTCATATCCAATCCATCTCAAAC
Gut_R1058_SP44	TTGGCAGAAAACGGGACGGAGTGGGTGATC	Gut_R1058	GTTTGAGAGTAGTGTCATATCCAATCCATCTCAAAC
Gut_R1058_SP45	CAAGTGAAGGAAAGTGGTTACTACATCAGA	Gut_R1058	GTTTGAGAGTAGTGTCATATCCAATCCATCTCAAAC
Gut_R1058_SP46	AATCTATTCCGGATTTATAGACAACTTGGA	Gut_R1058	GTTTGAGAGTAGTGTCATATCCAATCCATCTCAAAC
Gut_R1058_SP47	GAATTAGTCGAGCAGTTGAAACGTGAAGAG	Gut_R1058	GTTTGAGAGTAGTGTCATATCCAATCCATCTCAAAC
Gut_R1058_SP48	GCTATATGATTCATCACCGTGACGATACGG	Gut_R1058	GTTTGAGAGTAGTGTCATATCCAATCCATCTCAAAC
Gut_R1058_SP49	TAACCAATCGGCGCACCATAGCGATTCAGC	Gut_R1058	GTTTGAGAGTAGTGTCATATCCAATCCATCTCAAAC
Gut_R1058_SP5	GAATGCGCGCGCAAGTGGGCAGGATTTAAC	Gut_R1058	GTTTGAGAGTAGTGTCATATCCAATCCATCTCAAAC
Gut_R1058_SP50	CGAGTGCTCATGAAAGGCGGCGGCATTCCT	Gut_R1058	GTTTGAGAGTAGTGTCATATCCAATCCATCTCAAAC
Gut_R1058_SP51	GAAAGTATAGGCATAGCGCAGAACTCATTA	Gut_R1058	GTTTGAGAGTAGTGTCATATCCAATCCATCTCAAAC
Gut_R1058_SP52	CTCGGCATTCGTATAGCCTTTGAAAAACTA	Gut_R1058	GTTTGAGAGTAGTGTCATATCCAATCCATCTCAAAC
Gut_R1058_SP53	GTTAAGATTGTATTGCGCCACAACTTCTTT	Gut_R1058	GTTTGAGAGTAGTGTCATATCCAATCCATCTCAAAC
Gut_R1058_SP54	GTTTGCCCGACTTGACGCTGGCGCGGAAGT	Gut_R1058	GTTTGAGAGTAGTGTCATATCCAATCCATCTCAAAC
Gut_R1058_SP55	GATGTTCCATTAATACGTCACCTCTTGCTC	Gut_R1058	GTTTGAGAGTAGTGTCATATCCAATCCATCTCAAAC
Gut_R1058_SP56	TCGATAAAAGATTTCTAACGTTTTCAATGA	Gut_R1058	GTTTGAGAGTAGTGTCATATCCAATCCATCTCAAAC
Gut_R1058_SP57	AATGGGCCAACACGCATCTATTCAAATTAA	Gut_R1058	GTTTGAGAGTAGTGTCATATCCAATCCATCTCAAAC
Gut_R1058_SP58	CGCCGTCAACGTCACCGGAGCCGCTTTCGC	Gut_R1058	GTTTGAGAGTAGTGTCATATCCAATCCATCTCAAAC
Gut_R1058_SP59	ACGGTCGACCGACTCAGATTAAAAAGATAA	Gut_R1058	GTTTGAGAGTAGTGTCATATCCAATCCATCTCAAAC
Gut_R1058_SP6	TTCCCGATGTGCCGTTAACCTTCACGCTTC	Gut_R1058	GTTTGAGAGTAGTGTCATATCCAATCCATCTCAAAC
Gut_R1058_SP60	TTTGACCACCTCTCCATTCTCTAAACATTT	Gut_R1058	GTTTGAGAGTAGTGTCATATCCAATCCATCTCAAAC
Gut_R1058_SP61	TCTGTCCGCGTCGCCGTTTCTGCATCTCCT	Gut_R1058	GTTTGAGAGTAGTGTCATATCCAATCCATCTCAAAC
Gut_R1058_SP62	TGCAACGATAAACGAGTGCGGCCGCTGACC	Gut_R1058	GTTTGAGAGTAGTGTCATATCCAATCCATCTCAAAC
Gut_R1058_SP63	GTGTTGTATTGCCCTCGTACAAGTCCTTCG	Gut_R1058	GTTTGAGAGTAGTGTCATATCCAATCCATCTCAAAC
Gut_R1058_SP64	GCTTGCTCGCGTGTTTGTATGAGATATTTA	Gut_R1058	GTTTGAGAGTAGTGTCATATCCAATCCATCTCAAAC
Gut_R1058_SP65	TCAACTAGCTTTTTACGCTTACTCATCTTC	Gut_R1058	GTTTGAGAGTAGTGTCATATCCAATCCATCTCAAAC
Gut_R1058_SP66	CGTTTTAGTCGAATTGGCGTTCATTGATAA	Gut_R1058	GTTTGAGAGTAGTGTCATATCCAATCCATCTCAAAC
Gut_R1058_SP67	TCGCCTGTTCGTCGAGAACGTCGTTCTCAT	Gut_R1058	GTTTGAGAGTAGTGTCATATCCAATCCATCTCAAAC
Gut_R1058_SP68	TTATCTTTTCTTTGATGTATTCTTTAGGT	Gut_R1058	GTTTGAGAGTAGTGTCATATCCAATCCATCTCAAAC
Gut_R1058_SP69	GTTCCCTCTTTTACTTCTTTTTGATACGCG	Gut_R1058	GTTTGAGAGTAGTGTCATATCCAATCCATCTCAAAC
Gut_R1058_SP7	CAACGGCATGAATAATTCTTTCATCTCCGA	Gut_R1058	GTTTGAGAGTAGTGTCATATCCAATCCATCTCAAAC
Gut_R1058_SP70	CGTTCTGCCCGCATAATCCACCCATTGAAT	Gut_R1058	GTTTGAGAGTAGTGTCATATCCAATCCATCTCAAAC
Gut_R1058_SP71	TACTGCCGCACGACATCAACGAAGATGAC	Gut_R1058	GTTTGAGAGTAGTGTCATATCCAATCCATCTCAAAC
Gut_R1058_SP72	AAAAGATACACGGAGGTGAACAGTGATGTG	Gut_R1058	GTTTGAGAGTAGTGTCATATCCAATCCATCTCAAAC
Gut_R1058_SP73	GTCATATCTTCCTCGTTTATGATTAATTCC	Gut_R1058	GTTTGAGAGTAGTGTCATATCCAATCCATCTCAAAC
Gut_R1058_SP74	TCGACTCTAATCGACTGCAACGTAACAACC	Gut_R1058	GTTTGAGAGTAGTGTCATATCCAATCCATCTCAAAC
Gut_R1058_SP75	GACGCAGCCATCAACAATTTATACATCATT	Gut_R1058	GTTTGAGAGTAGTGTCATATCCAATCCATCTCAAAC
Gut_R1058_SP76	CCGAAGGGCGTGTGTCTTCCCGCTTTTGT	Gut_R1058	GTTTGAGAGTAGTGTCATATCCAATCCATCTCAAAC
Gut_R1058_SP77	GCGCCATCGTGTTAAACGCGTTACAGTGAA	Gut_R1058	GTTTGAGAGTAGTGTCATATCCAATCCATCTCAAAC
Gut_R1058_SP78	CGCATATTTCGCTCAAACTGTCCGACTGG	Gut_R1058	GTTTGAGAGTAGTGTCATATCCAATCCATCTCAAAC
Gut_R1058_SP79	TTATGTTGTGAATTTCAACAACAAAAGTTG	Gut_R1058	GTTTGAGAGTAGTGTCATATCCAATCCATCTCAAAC
Gut_R1058_SP8	AAGAATGTCCAGTGTGCCATGAAGGAAAGT	Gut_R1058	GTTTGAGAGTAGTGTCATATCCAATCCATCTCAAAC
Gut_R1058_SP80	TAAACCGGGGTTAGTATATTCTTTAACGGC	Gut_R1058	GTTTGAGAGTAGTGTCATATCCAATCCATCTCAAAC
Gut_R1058_SP81	GCAAGAATTGTTTGAAAACACAAGGAACTT	Gut_R1058	GTTTGAGAGTAGTGTCATATCCAATCCATCTCAAAC
Gut_R1058_SP82	TTAAGTGGGAAGCCCGAAGATGCAGAGCGC	Gut_R1058	GTTTGAGAGTAGTGTCATATCCAATCCATCTCAAAC
Gut_R1058_SP83	CGTCGGGCTCGAATGGACAACAACCAAATA	Gut_R1058	GTTTGAGAGTAGTGTCATATCCAATCCATCTCAAAC
Gut_R1058_SP84	ATTTAGAGTACTTATACGGCGATAAGCGCT	Gut_R1058	GTTTGAGAGTAGTGTCATATCCAATCCATCTCAAAC
Gut_R1058_SP85	CCATGGTGAGGCATTTCGGCAAAGAACCGG	Gut_R1058	GTTTGAGAGTAGTGTCATATCCAATCCATCTCAAAC
Gut_R1058_SP86	AGCGTCGGCGAGCTTCGTCATCGCCTCCGA	Gut_R1058	GTTTGAGAGTAGTGTCATATCCAATCCATCTCAAAC
Gut_R1058_SP87	GGCAACAATAACTGGGAAGAAGGTAACCGC	Gut_R1058	GTTTGAGAGTAGTGTCATATCCAATCCATCTCAAAC
Gut_R1058_SP88	TTGGCAACGGCGAAATACGCGGGCACGCGC	Gut_R1058	GTTTGAGAGTAGTGTCATATCCAATCCATCTCAAAC
Gut_R1058_SP89	CCGGCGGCTGGAACATGACCGGGACAGTGT	Gut_R1058	GTTTGAGAGTAGTGTCATATCCAATCCATCTCAAAC
Gut_R1058_SP9	TAAACGCTTACCGCGCGCTCCATATCCGGC	Gut_R1058	GTTTGAGAGTAGTGTCATATCCAATCCATCTCAAAC
Gut_R1058_SP90	ACATATTCGGGGAAGGTGATAGGTCAGAAT	Gut_R1058	GTTTGAGAGTAGTGTCATATCCAATCCATCTCAAAC
Gut_R1058_SP91	TGACCAATTCAAGATTATTCCGCTTGCCGA	Gut_R1058	GTTTGAGAGTAGTGTCATATCCAATCCATCTCAAAC
Gut_R1058_SP92	CATTAGAAATTAGCAGAAGCGGGTTTACTG	Gut_R1058	GTTTGAGAGTAGTGTCATATCCAATCCATCTCAAAC
Gut_R1058_SP93	TATTCAGAACGTGCAAACGATTGTAACGAC	Gut_R1058	GTTTGAGAGTAGTGTCATATCCAATCCATCTCAAAC
Gut_R1058_SP94	CCCGTCGGTCAAGGACGAAGAATCAATGTA	Gut_R1058	GTTTGAGAGTAGTGTCATATCCAATCCATCTCAAAC
Gut_R1058_SP95	TTTACAAAGACATCGCCTAGCAGTACCCGG	Gut_R1058	GTTTGAGAGTAGTGTCATATCCAATCCATCTCAAAC
Gut_R1058_SP96	AAATCAAGCCGTATCTGGCTAATTACAAGA	Gut_R1058	GTTTGAGAGTAGTGTCATATCCAATCCATCTCAAAC
Gut_R1058_SP97	AACAGTATTTGATCTTTACGATGTTCATTA	Gut_R1058	GTTTGAGAGTAGTGTCATATCCAATCCATCTCAAAC
Gut_R1058_SP98	AGAGTGTGCGGAGTACCGCGCCCCTGATGT	Gut_R1058	GTTTGAGAGTAGTGTCATATCCAATCCATCTCAAAC
Gut_R1058_SP99	GCTCCAGTCCGACAGTTTGAGCGAAATATG	Gut_R1058	GTTTGAGAGTAGTGTCATATCCAATCCATCTCAAAC
Gut_R1059_SP1	CATTTTTCCACTCCGTGTATCCGTCTG	Gut_R1059	ATTACATCATACCAAAAATTGTTAGGGAACTACAGCTAA
Gut_R1059_SP2	TAAAAGTTTCACTACTTGCGGAATAA	Gut_R1059	ATTACATCATACCAAAAATTGTTAGGGAACTACAGCTAA
Gut_R1059_SP3	GAGCTTCCGAAAAAGTCATTTTCATA	Gut_R1059	ATTACATCATACCAAAAATTGTTAGGGAACTACAGCTAA
Gut_R1059_SP4	TCGTTTCTTTCATCACGACACTAATTG	Gut_R1059	ATTACATCATACCAAAAATTGTTAGGGAACTACAGCTAA
Gut_R1059_SP5	CTCTTTAGATTTAGCTTATCTGCAAGT	Gut_R1059	ATTACATCATACCAAAAATTGTTAGGGAACTACAGCTAA
Gut_R106_SP1	ACTTTTTGAACAATGCTCCCAACAGCTATATCGT	Gut_R106	GTCGTACCTTATATAGGTACGTGGATTGAAAC
Gut_R106_SP10	CGCTCTTACTGCTCCGCAGCAAGGCATTGCGCC	Gut_R106	GTCGTACCTTATATAGGTACGTGGATTGAAAC
Gut_R106_SP100	TTATGACAAGGCGATGAAGATGTACCAGCTTTTC	Gut_R106	GTCGTACCTTATATAGGTACGTGGATTGAAAC
Gut_R106_SP101	TAACAATTGATGTCGGGGAACCTAACCTTGAAA	Gut_R106	GTCGTACCTTATATAGGTACGTGGATTGAAAC
Gut_R106_SP102	ACCCATGGTCTCCTTTTACCCCTCGCAGGCTTTG	Gut_R106	GTCGTACCTTATATAGGTACGTGGATTGAAAC
Gut_R106_SP103	CTTCGTCCACCGCCACGAATGGTAGCGATCATC	Gut_R106	GTCGTACCTTATATAGGTACGTGGATTGAAAC
Gut_R106_SP104	AAAACCACCGTATTTTTCTAAAGCTATTGATCT	Gut_R106	GTCGTACCTTATATAGGTACGTGGATTGAAAC
Gut_R106_SP105	TCGTGGTTATTGGCGTTATCAGTCTTTAGGCTC	Gut_R106	GTCGTACCTTATATAGGTACGTGGATTGAAAC
Gut_R106_SP106	CCTATCGTATAATACCGAGAAGCGTCTATAAGA	Gut_R106	GTCGTACCTTATATAGGTACGTGGATTGAAAC
Gut_R106_SP107	CCGTGTCAGGAAGGGGAGGTGAGAGTATGAGTA	Gut_R106	GTCGTACCTTATATAGGTACGTGGATTGAAAC
Gut_R106_SP108	TGCTCATCATCTGTCGAGAAAAACTCAACAAAT	Gut_R106	GTCGTACCTTATATAGGTACGTGGATTGAAAC
Gut_R106_SP109	CTTTGTTGATTGCGTTATACAGGTTATTTTGCTGC	Gut_R106	GTCGTACCTTATATAGGTACGTGGATTGAAAC
Gut_R106_SP11	TTCTGTTCCTCCTGCTGACGTTGCGAGCCCTATC	Gut_R106	GTCGTACCTTATATAGGTACGTGGATTGAAAC
Gut_R106_SP110	AAGAATACATCCAAAGGAACGCCCAGCATTAACG	Gut_R106	GTCGTACCTTATATAGGTACGTGGATTGAAAC
Gut_R106_SP111	CGGGTAGCAGAGAACGGCTATACAGATGGTACA	Gut_R106	GTCGTACCTTATATAGGTACGTGGATTGAAAC
Gut_R106_SP112	ATTTGTTTAGGGTACGCGCGTCTAATGTTAGG	Gut_R106	GTCGTACCTTATATAGGTACGTGGATTGAAAC
Gut_R106_SP113	GTCTGGATAGGGAACATCATAGGCATGAACCGAA	Gut_R106	GTCGTACCTTATATAGGTACGTGGATTGAAAC
Gut_R106_SP114	TTGTGATGATTTTATTTTGCATCATGTTAAACA	Gut_R106	GTCGTACCTTATATAGGTACGTGGATTGAAAC
Gut_R106_SP115	ACCGGATGCGGACCACTTAAAAAGCGTACAAAA	Gut_R106	GTCGTACCTTATATAGGTACGTGGATTGAAAC
Gut_R106_SP116	CAAATCTCCTTTAGTGATAATGACGGAGGGCATGGAG	Gut_R106	GTCGTACCTTATATAGGTACGTGGATTGAAAC
Gut_R106_SP117	AACAGGAGTAGGAGATGTAGAATAAATAATACG	Gut_R106	GTCGTACCTTATATAGGTACGTGGATTGAAAC
Gut_R106_SP118	TCTTCGGACAGGCTGATCACGGGAGGAAAATATT	Gut_R106	GTCGTACCTTATATAGGTACGTGGATTGAAAC
Gut_R106_SP119	GCTCATGACTCATCTCTTTTTAATTGTTATTTA	Gut_R106	GTCGTACCTTATATAGGTACGTGGATTGAAAC
[truncated: 158,594 more rows]
