# Supplementary material for: Metagenomic analysis with strain-level resolution reveals fine-scale variation in the human pregnancy microbiome
Source: HighWire-hosted journal article supplement (doi:10.1101/gr.236000.118), 2018-09-19
Supplement: Supplemental_Table_S3.xlsx [file Supplemental_Table_S3.xlsx]

## Sheet: final_table (2)
Supplementary Table S3. Frequency of spacer matches to pregnancy scaffolds separated by body site (Vagina, Saliva, and Gut) and individual (Term1-Pre4). Cells in the table are colored different shades of bluet, with the darkest blue indicating the maximum numbers of matches.
and white (no color) as the minimum value. Note that the numbers represent the frequency of spacer matches (non-unique) rather than an unique number of spacers that matched pregnancy scaffolds.
	Term1			Term2			Term3			Term4			Term5			Term6			Pre1			Pre2			Pre3		Pre4
	Vagina	Saliva	Gut	Vagina	Saliva	Gut	Vagina	Saliva	Gut	Vagina	Saliva	Gut	Vagina	Saliva	Gut	Vagina	Saliva	Gut	Vagina	Saliva	Gut	Vagina	Saliva	Gut	Vagina	Saliva	Vagina	Saliva	Gut
Term1 Vag Spacers	40	20	4	24	0	1	40	0	1	9	20	4	20	0	2	27	0	2	51	8	2	47	1	4	43	22	1	20	1
Term1 Sal Spacers	1	414	43	14	352	59	5	419	41	12	314	57	0	314	48	1	358	40	11	498	35	3	346	25	0	321	7	101	11
Term1 Gut Spacers	2	47	682	16	44	336	3	66	416	24	52	492	6	34	326	1	43	307	7	62	542	4	41	350	1	42	8	20	39
Term2 Vag Spacers	0	11	7	47	13	163	7	11	53	61	10	112	5	14	125	0	18	220	1	13	38	1	15	19	0	12	33	2	81
Term2 Sal Spacers	0	344	34	5	390	45	1	467	31	6	338	40	1	342	38	0	413	32	17	405	46	2	355	17	0	318	1	134	12
Term2 Gut Spacers	2	62	327	182	57	1157	21	79	474	157	50	1193	14	59	807	2	73	1275	8	82	382	16	71	321	2	68	171	23	541
Term3 Vag Spacers	0	2	2	8	1	22	4	1	7	8	1	11	0	1	11	0	0	27	1	0	2	0	1	3	0	1	12	1	10
Term3 Sal Spacers	0	704	143	27	774	169	2	1362	122	15	795	165	4	788	112	1	937	103	37	1204	137	6	903	111	1	838	13	243	40
Term3 Gut Spacers	1	38	469	45	22	463	10	34	488	54	33	537	4	26	429	0	24	453	8	35	400	5	31	346	0	27	28	13	102
Term4 Vag Spacers	30	13	17	81	6	171	90	7	54	147	31	94	69	41	94	33	39	157	43	13	37	32	27	25	35	32	70	7	70
Term4 Sal Spacers	2	423	46	6	443	65	1	575	50	8	470	41	1	443	46	1	548	70	20	667	47	4	463	46	1	383	5	184	12
Term4 Gut Spacers	0	80	677	108	68	621	13	107	479	80	76	833	14	55	421	0	76	606	5	114	555	11	81	403	0	83	43	43	158
Term5 Vag Spacers	52	31	2	46	28	49	46	2	9	47	18	41	40	22	27	38	14	44	46	26	8	55	11	6	50	20	36	31	26
Term5 Sal Spacers	1	346	27	10	333	45	1	445	36	15	384	32	1	461	38	0	422	38	21	537	21	1	302	12	0	299	5	156	14
Term5 Gut Spacers	0	31	296	133	21	812	4	40	438	181	29	705	11	24	786	1	31	936	5	51	383	17	44	300	0	34	85	9	215
Term6 Vag Spacers	0	0	0	1	0	1	0	1	0	0	0	0	4	0	6	1	0	1	3	0	0	0	1	0	0	1	1	0	0
Term6 Sal Spacers	0	667	57	19	661	89	5	968	74	11	551	92	0	715	82	0	1136	70	24	996	59	11	815	57	0	550	8	174	42
Term6 Gut Spacers	1	40	231	195	35	993	15	54	392	233	34	786	20	31	802	2	43	1188	5	60	433	21	37	291	1	39	107	23	328
Pre1 Vag Spacers	13	71	21	17	93	19	11	101	22	5	74	51	12	64	44	19	77	35	22	128	45	13	59	21	13	79	17	39	18
Pre1 Sal Spacers	0	892	69	43	628	83	4	959	46	28	798	72	6	603	70	0	828	86	17	1445	53	21	798	49	1	693	17	233	28
Pre1 Gut Spacers	1	32	497	24	20	383	6	32	348	37	24	482	2	17	319	0	21	255	10	34	514	2	27	360	1	31	14	14	57
Pre2 Vag Spacers	0	3	2	4	3	22	22	7	7	8	3	11	0	5	3	0	1	27	0	6	1	23	4	2	0	2	10	2	15
Pre2 Sal Spacers	0	437	61	15	441	91	1	644	39	16	503	76	2	494	67	0	645	69	18	640	59	1	660	65	0	460	4	174	19
Pre2 Gut Spacers	0	28	348	42	24	315	7	38	312	43	14	397	10	11	249	0	26	278	0	27	345	34	30	390	0	21	33	4	46
Pre3 Vag Spacers	61	31	0	65	1	0	69	1	0	58	15	1	70	1	2	68	1	0	102	7	1	99	1	3	82	16	29	15	1
Pre3 Sal Spacers	0	475	29	19	437	63	3	752	36	12	336	43	2	517	48	0	517	44	10	602	35	4	794	35	0	768	7	168	18
Pre4 Vag Spacers	1	4	9	36	6	129	18	5	33	44	6	64	3	2	64	1	7	112	1	4	12	4	8	20	1	6	36	2	64
Pre4 Sal Spacers	0	128	18	9	189	31	0	175	8	4	179	25	0	134	24	0	180	24	3	257	21	0	185	10	0	175	2	89	7
Pre4 Gut Spacers	0	12	32	67	17	299	10	13	97	83	13	208	10	15	152	2	30	304	2	24	64	2	29	60	0	12	49	6	170
