# Supplementary material for: Metagenomic analysis with strain-level resolution reveals fine-scale variation in the human pregnancy microbiome
Source: HighWire-hosted journal article supplement (doi:10.1101/gr.236000.118), 2018-09-19
Supplement: Supplemental_Table_S4.xlsx [file Supplemental_Table_S4.xlsx]

## Sheet: Sheet1
Supplemental Table S4. Frequency of typical vaginal taxa in gut samples in a 16S rRNA amplicon dataset.
Of 49 subjects analyzed in DiGiulio et al. (2015), 41 provided both vaginal and gut (stool and rectal swabs) samples.
Gut samples were surveyed for the vaginal bacterial species, L. iners, L. crispatus, L. gasseri, L. jensenii,
and G. vaginalis, and the number of taxa shared between body sites and the number of samples in which they were
shared within subjects were estimated.
	Total number time points	Vaginal taxa in gut	Number of samples shared	Number of taxa shared
10001	20	no	0	0
10002	1	no	0	0
10003	9	no	0	0
10007	1	no	0	0
10010	1	no	0	0
10016	1	no	0	0
10024	23	yes	0	0
10039	36	no	0	0
10008	15	yes	1	1
10022	25	yes	1	1
10028	34	yes	1	1
19006	7	yes	1	1
19007	2	yes	1	1
19009	4	yes	1	1
19010	2	yes	1	1
10004	5	yes	2	1
10101	47	yes	2	1
10006	18	yes	3	2
10013	17	yes	3	2
10021	21	yes	3	1
10031	26	yes	3	1
10009	9	yes	4	5
10020	14	yes	4	2
10023	18	yes	4	3
19004	24	yes	4	1
10017	9	yes	5	2
10025	9	yes	5	3
10029	8	yes	6	2
10043	23	yes	6	3
10045	31	yes	7	2
10005	9	yes	8	2
10034	34	yes	8	1
10040	28	yes	8	2
10014	21	yes	9	2
10055	19	yes	11	2
19005	17	yes	11	3
10047	29	yes	13	1
10032	33	yes	18	2
10018	24	yes	19	3
10046	30	yes	22	2
10044	32	yes	25	2
