# Supplementary material for: Metagenomic analysis with strain-level resolution reveals fine-scale variation in the human pregnancy microbiome
Source: HighWire-hosted journal article supplement (doi:10.1101/gr.236000.118), 2018-09-19
Supplement: Supplemental_Table_S5.xlsx [file Supplemental_Table_S5.xlsx]

## Sheet: Sheet1
Supplemental Tables S5. BioSample accession numbers for the 292 samples reported in this study.
BioSample Accession	Files
SAMN03843448	mod1_wohuman_screen100.1.fq (fastq)
	mod1_S_wohuman_clip.fastq (fastq)
	mod1_wohuman_screen100.2.fq (fastq)
SAMN03843450	mod2_wohuman_screen100.1.fq (fastq)
	mod2_S_wohuman_clip.fastq (fastq)
	mod2_wohuman_screen100.2.fq (fastq)
SAMN03843453	mod3_wohuman_screen100.1.fq (fastq)
	mod3_S_wohuman_clip.fastq (fastq)
	mod3_wohuman_screen100.2.fq (fastq)
SAMN03843444	mod4_wohuman_screen100.1.fq (fastq)
	mod4_S_wohuman_clip.fastq (fastq)
	mod4_wohuman_screen100.2.fq (fastq)
SAMN03843432	mod5_wohuman_screen100.1.fq (fastq)
	mod5_S_wohuman_clip.fastq (fastq)
	mod5_wohuman_screen100.2.fq (fastq)
SAMN03843435	mod6_wohuman_screen100.1.fq (fastq)
	mod6_S_wohuman_clip.fastq (fastq)
	mod6_wohuman_screen100.2.fq (fastq)
SAMN03843430	mod7_wohuman_screen100.1.fq (fastq)
	mod7_S_wohuman_clip.fastq (fastq)
	mod7_wohuman_screen100.2.fq (fastq)
SAMN03843426	mod8_wohuman_screen100.1.fq (fastq)
	mod8_S_wohuman_clip.fastq (fastq)
	mod8_wohuman_screen100.2.fq (fastq)
SAMN03843422	mod9_wohuman_screen100.1.fq (fastq)
	mod9_S_wohuman_clip.fastq (fastq)
	mod9_wohuman_screen100.2.fq (fastq)
SAMN03843457	mod10_wohuman_screen100.1.fq (fastq)
	mod10_S_wohuman_clip.fastq (fastq)
	mod10_wohuman_screen100.2.fq (fastq)
SAMN03843421	mod11_wohuman_screen100.1.fq (fastq)
	mod11_S_wohuman_clip.fastq (fastq)
	mod11_wohuman_screen100.2.fq (fastq)
SAMN03843568	mod12_wohuman_screen100.1.fq (fastq)
	mod12_S_wohuman_clip.fastq (fastq)
	mod12_wohuman_screen100.2.fq (fastq)
SAMN03843586	mod13_wohuman_screen100.1.fq (fastq)
	mod13_S_wohuman_clip.fastq (fastq)
	mod13_wohuman_screen100.2.fq (fastq)
SAMN03843573	mod14_wohuman_screen100.1.fq (fastq)
	mod14_S_wohuman_clip.fastq (fastq)
	mod14_wohuman_screen100.2.fq (fastq)
SAMN03843576	mod15_wohuman_screen100.1.fq (fastq)
	mod15_S_wohuman_clip.fastq (fastq)
	mod15_wohuman_screen100.2.fq (fastq)
SAMN03843579	mod16_wohuman_screen100.1.fq (fastq)
	mod16_S_wohuman_clip.fastq (fastq)
	mod16_wohuman_screen100.2.fq (fastq)
SAMN03843582	mod17_wohuman_screen100.1.fq (fastq)
	mod17_S_wohuman_clip.fastq (fastq)
	mod17_wohuman_screen100.2.fq (fastq)
SAMN03843585	mod18_wohuman_screen100.1.fq (fastq)
	mod18_S_wohuman_clip.fastq (fastq)
	mod18_wohuman_screen100.2.fq (fastq)
SAMN03843589	mod19_wohuman_screen100.1.fq (fastq)
	mod19_S_wohuman_clip.fastq (fastq)
	mod19_wohuman_screen100.2.fq (fastq)
SAMN03843592	mod20_wohuman_screen100.1.fq (fastq)
	mod20_S_wohuman_clip.fastq (fastq)
	mod20_wohuman_screen100.2.fq (fastq)
SAMN03843595	mod21_wohuman_screen100.1.fq (fastq)
	mod21_S_wohuman_clip.fastq (fastq)
	mod21_wohuman_screen100.2.fq (fastq)
SAMN03843598	mod22_wohuman_screen100.1.fq (fastq)
	mod22_S_wohuman_clip.fastq (fastq)
	mod22_wohuman_screen100.2.fq (fastq)
SAMN03844207	mod23_wohuman_screen100.1.fq (fastq)
	mod23_S_wohuman_clip.fastq (fastq)
	mod23_wohuman_screen100.2.fq (fastq)
SAMN03844210	mod24_wohuman_screen100.1.fq (fastq)
	mod24_S_wohuman_clip.fastq (fastq)
	mod24_wohuman_screen100.2.fq (fastq)
SAMN03844213	mod25_wohuman_screen100.1.fq (fastq)
	mod25_S_wohuman_clip.fastq (fastq)
	mod25_wohuman_screen100.2.fq (fastq)
SAMN03844216	mod26_wohuman_screen100.1.fq (fastq)
	mod26_S_wohuman_clip.fastq (fastq)
	mod26_wohuman_screen100.2.fq (fastq)
SAMN03844219	mod27_wohuman_screen100.1.fq (fastq)
	mod27_S_wohuman_clip.fastq (fastq)
	mod27_wohuman_screen100.2.fq (fastq)
SAMN03844222	mod28_wohuman_screen100.1.fq (fastq)
	mod28_S_wohuman_clip.fastq (fastq)
	mod28_wohuman_screen100.2.fq (fastq)
SAMN03844225	mod29_wohuman_screen100.1.fq (fastq)
	mod29_S_wohuman_clip.fastq (fastq)
	mod29_wohuman_screen100.2.fq (fastq)
SAMN03844228	mod30_wohuman_screen100.1.fq (fastq)
	mod30_S_wohuman_clip.fastq (fastq)
	mod30_wohuman_screen100.2.fq (fastq)
SAMN03844234	mod31_wohuman_screen100.1.fq (fastq)
	mod31_S_wohuman_clip.fastq (fastq)
	mod31_wohuman_screen100.2.fq (fastq)
SAMN03844236	mod32_wohuman_screen100.1.fq (fastq)
	mod32_S_wohuman_clip.fastq (fastq)
	mod32_wohuman_screen100.2.fq (fastq)
SAMN03844237	mod33_wohuman_screen100.1.fq (fastq)
	mod33_S_wohuman_clip.fastq (fastq)
	mod33_wohuman_screen100.2.fq (fastq)
SAMN03844364	mod34_wohuman_screen100.1.fq (fastq)
	mod34_S_wohuman_clip.fastq (fastq)
	mod34_wohuman_screen100.2.fq (fastq)
SAMN03844367	mod35_wohuman_screen100.1.fq (fastq)
	mod35_S_wohuman_clip.fastq (fastq)
	mod35_wohuman_screen100.2.fq (fastq)
SAMN03844370	mod36_wohuman_screen100.1.fq (fastq)
	mod36_S_wohuman_clip.fastq (fastq)
	mod36_wohuman_screen100.2.fq (fastq)
SAMN03844373	mod37_wohuman_screen100.1.fq (fastq)
	mod37_S_wohuman_clip.fastq (fastq)
	mod37_wohuman_screen100.2.fq (fastq)
SAMN03844376	mod38_wohuman_screen100.1.fq (fastq)
	mod38_S_wohuman_clip.fastq (fastq)
	mod38_wohuman_screen100.2.fq (fastq)
SAMN03844379	mod39_wohuman_screen100.1.fq (fastq)
	mod39_S_wohuman_clip.fastq (fastq)
	mod39_wohuman_screen100.2.fq (fastq)
SAMN03844382	mod40_wohuman_screen100.1.fq (fastq)
	mod40_S_wohuman_clip.fastq (fastq)
	mod40_wohuman_screen100.2.fq (fastq)
SAMN03844385	mod41_wohuman_screen100.1.fq (fastq)
	mod41_S_wohuman_clip.fastq (fastq)
	mod41_wohuman_screen100.2.fq (fastq)
SAMN03844388	mod42_wohuman_screen100.1.fq (fastq)
	mod42_S_wohuman_clip.fastq (fastq)
	mod42_wohuman_screen100.2.fq (fastq)
SAMN03844391	mod43_wohuman_screen100.1.fq (fastq)
	mod43_S_wohuman_clip.fastq (fastq)
	mod43_wohuman_screen100.2.fq (fastq)
SAMN03844394	mod44_wohuman_screen100.1.fq (fastq)
	mod44_S_wohuman_clip.fastq (fastq)
	mod44_wohuman_screen100.2.fq (fastq)
SAMN03845187	mod45_wohuman_screen100.1.fq (fastq)
	mod45_S_wohuman_clip.fastq (fastq)
	mod45_wohuman_screen100.2.fq (fastq)
SAMN03845190	mod46_wohuman_screen100.1.fq (fastq)
	mod46_S_wohuman_clip.fastq (fastq)
	mod46_wohuman_screen100.2.fq (fastq)
SAMN03845196	mod47_wohuman_screen100.1.fq (fastq)
	mod47_S_wohuman_clip.fastq (fastq)
	mod47_wohuman_screen100.2.fq (fastq)
SAMN03845195	mod48_wohuman_screen100.1.fq (fastq)
	mod48_S_wohuman_clip.fastq (fastq)
	mod48_wohuman_screen100.2.fq (fastq)
SAMN03845199	mod49_wohuman_screen100.1.fq (fastq)
	mod49_S_wohuman_clip.fastq (fastq)
	mod49_wohuman_screen100.2.fq (fastq)
SAMN03845202	mod50_wohuman_screen100.1.fq (fastq)
	mod50_S_wohuman_clip.fastq (fastq)
	mod50_wohuman_screen100.2.fq (fastq)
SAMN03845204	mod51_wohuman_screen100.1.fq (fastq)
	mod51_S_wohuman_clip.fastq (fastq)
	mod51_wohuman_screen100.2.fq (fastq)
SAMN03845207	mod52_wohuman_screen100.1.fq (fastq)
	mod52_S_wohuman_clip.fastq (fastq)
	mod52_wohuman_screen100.2.fq (fastq)
SAMN03845209	mod53_wohuman_screen100.1.fq (fastq)
	mod53_S_wohuman_clip.fastq (fastq)
	mod53_wohuman_screen100.2.fq (fastq)
SAMN03845183	mod54_wohuman_screen100.1.fq (fastq)
	mod54_S_wohuman_clip.fastq (fastq)
	mod54_wohuman_screen100.2.fq (fastq)
SAMN03845186	mod55_wohuman_screen100.1.fq (fastq)
	mod55_S_wohuman_clip.fastq (fastq)
	mod55_wohuman_screen100.2.fq (fastq)
SAMN03845365	mod56_wohuman_screen100.1.fq (fastq)
	mod56_S_wohuman_clip.fastq (fastq)
	mod56_wohuman_screen100.2.fq (fastq)
SAMN03845368	mod57_wohuman_screen100.1.fq (fastq)
	mod57_S_wohuman_clip.fastq (fastq)
	mod57_wohuman_screen100.2.fq (fastq)
SAMN03845371	mod58_wohuman_screen100.1.fq (fastq)
	mod58_S_wohuman_clip.fastq (fastq)
	mod58_wohuman_screen100.2.fq (fastq)
SAMN03845374	mod59_wohuman_screen100.1.fq (fastq)
	mod59_S_wohuman_clip.fastq (fastq)
	mod59_wohuman_screen100.2.fq (fastq)
SAMN03845377	mod60_wohuman_screen100.1.fq (fastq)
	mod60_S_wohuman_clip.fastq (fastq)
	mod60_wohuman_screen100.2.fq (fastq)
SAMN03845380	mod61_wohuman_screen100.1.fq (fastq)
	mod61_S_wohuman_clip.fastq (fastq)
	mod61_wohuman_screen100.2.fq (fastq)
SAMN03845383	mod62_wohuman_screen100.1.fq (fastq)
	mod62_S_wohuman_clip.fastq (fastq)
	mod62_wohuman_screen100.2.fq (fastq)
SAMN03845386	mod63_wohuman_screen100.1.fq (fastq)
	mod63_S_wohuman_clip.fastq (fastq)
	mod63_wohuman_screen100.2.fq (fastq)
SAMN03845389	mod64_wohuman_screen100.1.fq (fastq)
	mod64_S_wohuman_clip.fastq (fastq)
	mod64_wohuman_screen100.2.fq (fastq)
SAMN03845392	mod65_wohuman_screen100.1.fq (fastq)
	mod65_S_wohuman_clip.fastq (fastq)
	mod65_wohuman_screen100.2.fq (fastq)
SAMN03845395	mod66_wohuman_screen100.1.fq (fastq)
	mod66_S_wohuman_clip.fastq (fastq)
	mod66_wohuman_screen100.2.fq (fastq)
SAMN03843163	mod67_wohuman_screen100.1.fq (fastq)
	mod67_S_wohuman_clip.fastq (fastq)
	mod67_wohuman_screen100.2.fq (fastq)
SAMN03843393	mod68_wohuman_screen100.1.fq (fastq)
	mod68_S_wohuman_clip.fastq (fastq)
	mod68_wohuman_screen100.2.fq (fastq)
SAMN03843396	mod69_wohuman_screen100.1.fq (fastq)
	mod69_S_wohuman_clip.fastq (fastq)
	mod69_wohuman_screen100.2.fq (fastq)
SAMN03843399	mod70_wohuman_screen100.1.fq (fastq)
	mod70_S_wohuman_clip.fastq (fastq)
	mod70_wohuman_screen100.2.fq (fastq)
SAMN03843402	mod71_wohuman_screen100.1.fq (fastq)
	mod71_S_wohuman_clip.fastq (fastq)
	mod71_wohuman_screen100.2.fq (fastq)
SAMN03843405	mod72_wohuman_screen100.1.fq (fastq)
	mod72_S_wohuman_clip.fastq (fastq)
	mod72_wohuman_screen100.2.fq (fastq)
SAMN03843408	mod73_wohuman_screen100.1.fq (fastq)
	mod73_S_wohuman_clip.fastq (fastq)
	mod73_wohuman_screen100.2.fq (fastq)
SAMN03843411	mod74_wohuman_screen100.1.fq (fastq)
	mod74_S_wohuman_clip.fastq (fastq)
	mod74_wohuman_screen100.2.fq (fastq)
SAMN03843437	mod75_wohuman_screen100.1.fq (fastq)
	mod75_S_wohuman_clip.fastq (fastq)
	mod75_wohuman_screen100.2.fq (fastq)
SAMN03843440	mod76_wohuman_screen100.1.fq (fastq)
	mod76_S_wohuman_clip.fastq (fastq)
	mod76_wohuman_screen100.2.fq (fastq)
SAMN03843418	mod77_wohuman_screen100.1.fq (fastq)
	mod77_S_wohuman_clip.fastq (fastq)
	mod77_wohuman_screen100.2.fq (fastq)
SAMN03843368	mod78_wohuman_screen100.1.fq (fastq)
	mod78_S_wohuman_clip.fastq (fastq)
	mod78_wohuman_screen100.2.fq (fastq)
SAMN03843369	mod79_wohuman_screen100.1.fq (fastq)
	mod79_S_wohuman_clip.fastq (fastq)
	mod79_wohuman_screen100.2.fq (fastq)
SAMN03843373	mod80_wohuman_screen100.1.fq (fastq)
	mod80_S_wohuman_clip.fastq (fastq)
	mod80_wohuman_screen100.2.fq (fastq)
SAMN03843376	mod81_wohuman_screen100.1.fq (fastq)
	mod81_S_wohuman_clip.fastq (fastq)
	mod81_wohuman_screen100.2.fq (fastq)
SAMN03843378	mod82_wohuman_screen100.1.fq (fastq)
	mod82_S_wohuman_clip.fastq (fastq)
	mod82_wohuman_screen100.2.fq (fastq)
SAMN03843381	mod83_wohuman_screen100.1.fq (fastq)
	mod83_S_wohuman_clip.fastq (fastq)
	mod83_wohuman_screen100.2.fq (fastq)
SAMN03843384	mod84_wohuman_screen100.1.fq (fastq)
	mod84_S_wohuman_clip.fastq (fastq)
	mod84_wohuman_screen100.2.fq (fastq)
SAMN03843385	mod85_wohuman_screen100.1.fq (fastq)
	mod85_S_wohuman_clip.fastq (fastq)
	mod85_wohuman_screen100.2.fq (fastq)
SAMN03843388	mod86_wohuman_screen100.1.fq (fastq)
	mod86_S_wohuman_clip.fastq (fastq)
	mod86_wohuman_screen100.2.fq (fastq)
SAMN03843391	mod87_wohuman_screen100.1.fq (fastq)
	mod87_S_wohuman_clip.fastq (fastq)
	mod87_wohuman_screen100.2.fq (fastq)
SAMN03844112	mod88_wohuman_screen100.1.fq (fastq)
	mod88_S_wohuman_clip.fastq (fastq)
	mod88_wohuman_screen100.2.fq (fastq)
SAMN03844115	mod89_wohuman_screen100.1.fq (fastq)
	mod89_S_wohuman_clip.fastq (fastq)
	mod89_wohuman_screen100.2.fq (fastq)
SAMN03844118	mod90_wohuman_screen100.1.fq (fastq)
	mod90_S_wohuman_clip.fastq (fastq)
	mod90_wohuman_screen100.2.fq (fastq)
SAMN03844121	mod91_wohuman_screen100.1.fq (fastq)
	mod91_S_wohuman_clip.fastq (fastq)
	mod91_wohuman_screen100.2.fq (fastq)
SAMN03844124	mod92_wohuman_screen100.1.fq (fastq)
	mod92_S_wohuman_clip.fastq (fastq)
	mod92_wohuman_screen100.2.fq (fastq)
SAMN03844127	mod93_wohuman_screen100.1.fq (fastq)
	mod93_S_wohuman_clip.fastq (fastq)
	mod93_wohuman_screen100.2.fq (fastq)
SAMN03844130	mod94_wohuman_screen100.1.fq (fastq)
	mod94_S_wohuman_clip.fastq (fastq)
	mod94_wohuman_screen100.2.fq (fastq)
SAMN03844133	mod95_wohuman_screen100.1.fq (fastq)
	mod95_S_wohuman_clip.fastq (fastq)
	mod95_wohuman_screen100.2.fq (fastq)
SAMN03844136	mod96_wohuman_screen100.1.fq (fastq)
	mod96_S_wohuman_clip.fastq (fastq)
	mod96_wohuman_screen100.2.fq (fastq)
SAMN03844139	mod97_wohuman_screen100.1.fq (fastq)
	mod97_S_wohuman_clip.fastq (fastq)
	mod97_wohuman_screen100.2.fq (fastq)
SAMN03844141	mod98_wohuman_screen100.1.fq (fastq)
	mod98_S_wohuman_clip.fastq (fastq)
	mod98_wohuman_screen100.2.fq (fastq)
SAMN03844230	mod99_wohuman_screen100.1.fq (fastq)
	mod99_S_wohuman_clip.fastq (fastq)
	mod99_wohuman_screen100.2.fq (fastq)
SAMN03844233	mod100_wohuman_screen100.1.fq (fastq)
	mod100_S_wohuman_clip.fastq (fastq)
	mod100_wohuman_screen100.2.fq (fastq)
SAMN03844187	mod101_wohuman_screen100.1.fq (fastq)
	mod101_S_wohuman_clip.fastq (fastq)
	mod101_wohuman_screen100.2.fq (fastq)
SAMN03844190	mod102_wohuman_screen100.1.fq (fastq)
	mod102_S_wohuman_clip.fastq (fastq)
	mod102_wohuman_screen100.2.fq (fastq)
SAMN03844192	mod103_wohuman_screen100.1.fq (fastq)
	mod103_S_wohuman_clip.fastq (fastq)
	mod103_wohuman_screen100.2.fq (fastq)
SAMN03844195	mod104_wohuman_screen100.1.fq (fastq)
	mod104_S_wohuman_clip.fastq (fastq)
	mod104_wohuman_screen100.2.fq (fastq)
SAMN03844198	mod105_wohuman_screen100.1.fq (fastq)
	mod105_S_wohuman_clip.fastq (fastq)
	mod105_wohuman_screen100.2.fq (fastq)
SAMN03844199	mod106_wohuman_screen100.1.fq (fastq)
	mod106_S_wohuman_clip.fastq (fastq)
	mod106_wohuman_screen100.2.fq (fastq)
SAMN03844202	mod107_wohuman_screen100.1.fq (fastq)
	mod107_S_wohuman_clip.fastq (fastq)
	mod107_wohuman_screen100.2.fq (fastq)
SAMN03844205	mod108_wohuman_screen100.1.fq (fastq)
	mod108_S_wohuman_clip.fastq (fastq)
	mod108_wohuman_screen100.2.fq (fastq)
SAMN03845224	mod109_wohuman_screen100.1.fq (fastq)
	mod109_S_wohuman_clip.fastq (fastq)
	mod109_wohuman_screen100.2.fq (fastq)
SAMN03845091	mod110_wohuman_screen100.1.fq (fastq)
	mod110_S_wohuman_clip.fastq (fastq)
	mod110_wohuman_screen100.2.fq (fastq)
SAMN03845094	mod111_wohuman_screen100.1.fq (fastq)
	mod111_S_wohuman_clip.fastq (fastq)
	mod111_wohuman_screen100.2.fq (fastq)
SAMN03845097	mod112_wohuman_screen100.1.fq (fastq)
	mod112_S_wohuman_clip.fastq (fastq)
	mod112_wohuman_screen100.2.fq (fastq)
SAMN03845100	mod113_wohuman_screen100.1.fq (fastq)
	mod113_S_wohuman_clip.fastq (fastq)
	mod113_wohuman_screen100.2.fq (fastq)
SAMN03845103	mod114_wohuman_screen100.1.fq (fastq)
	mod114_S_wohuman_clip.fastq (fastq)
	mod114_wohuman_screen100.2.fq (fastq)
SAMN03845106	mod115_wohuman_screen100.1.fq (fastq)
	mod115_S_wohuman_clip.fastq (fastq)
	mod115_wohuman_screen100.2.fq (fastq)
SAMN03845108	mod116_wohuman_screen100.1.fq (fastq)
	mod116_S_wohuman_clip.fastq (fastq)
	mod116_wohuman_screen100.2.fq (fastq)
SAMN03845111	mod117_wohuman_screen100.1.fq (fastq)
	mod117_S_wohuman_clip.fastq (fastq)
	mod117_wohuman_screen100.2.fq (fastq)
SAMN03845114	mod118_wohuman_screen100.1.fq (fastq)
	mod118_S_wohuman_clip.fastq (fastq)
	mod118_wohuman_screen100.2.fq (fastq)
SAMN03845088	mod119_wohuman_screen100.1.fq (fastq)
	mod119_S_wohuman_clip.fastq (fastq)
	mod119_wohuman_screen100.2.fq (fastq)
SAMN03845225	mod120_wohuman_screen100.1.fq (fastq)
	mod120_S_wohuman_clip.fastq (fastq)
	mod120_wohuman_screen100.2.fq (fastq)
SAMN03845146	mod121_wohuman_screen100.1.fq (fastq)
	mod121_S_wohuman_clip.fastq (fastq)
	mod121_wohuman_screen100.2.fq (fastq)
SAMN03845139	mod122_wohuman_screen100.1.fq (fastq)
	mod122_S_wohuman_clip.fastq (fastq)
	mod122_wohuman_screen100.2.fq (fastq)
SAMN03845142	mod123_wohuman_screen100.1.fq (fastq)
	mod123_S_wohuman_clip.fastq (fastq)
	mod123_wohuman_screen100.2.fq (fastq)
SAMN03845132	mod124_wohuman_screen100.1.fq (fastq)
	mod124_S_wohuman_clip.fastq (fastq)
	mod124_wohuman_screen100.2.fq (fastq)
SAMN03845147	mod125_wohuman_screen100.1.fq (fastq)
	mod125_S_wohuman_clip.fastq (fastq)
	mod125_wohuman_screen100.2.fq (fastq)
SAMN03845150	mod126_wohuman_screen100.1.fq (fastq)
	mod126_S_wohuman_clip.fastq (fastq)
	mod126_wohuman_screen100.2.fq (fastq)
SAMN03845133	mod127_wohuman_screen100.1.fq (fastq)
	mod127_S_wohuman_clip.fastq (fastq)
	mod127_wohuman_screen100.2.fq (fastq)
SAMN03845152	mod128_wohuman_screen100.1.fq (fastq)
	mod128_S_wohuman_clip.fastq (fastq)
	mod128_wohuman_screen100.2.fq (fastq)
SAMN03845155	mod129_wohuman_screen100.1.fq (fastq)
	mod129_S_wohuman_clip.fastq (fastq)
	mod129_wohuman_screen100.2.fq (fastq)
SAMN03843626	mod130_wohuman_screen100.1.fq (fastq)
	mod130_S_wohuman_clip.fastq (fastq)
	mod130_wohuman_screen100.2.fq (fastq)
SAMN03843629	mod131_wohuman_screen100.1.fq (fastq)
	mod131_S_wohuman_clip.fastq (fastq)
	mod131_wohuman_screen100.2.fq (fastq)
SAMN03843633	mod132_wohuman_screen100.1.fq (fastq)
	mod132_S_wohuman_clip.fastq (fastq)
	mod132_wohuman_screen100.2.fq (fastq)
SAMN03843635	mod133_wohuman_screen100.1.fq (fastq)
	mod133_S_wohuman_clip.fastq (fastq)
	mod133_wohuman_screen100.2.fq (fastq)
SAMN03843638	mod134_wohuman_screen100.1.fq (fastq)
	mod134_S_wohuman_clip.fastq (fastq)
	mod134_wohuman_screen100.2.fq (fastq)
SAMN03843640	mod135_wohuman_screen100.1.fq (fastq)
	mod135_S_wohuman_clip.fastq (fastq)
	mod135_wohuman_screen100.2.fq (fastq)
SAMN03843643	mod136_wohuman_screen100.1.fq (fastq)
	mod136_S_wohuman_clip.fastq (fastq)
	mod136_wohuman_screen100.2.fq (fastq)
SAMN03843646	mod137_wohuman_screen100.1.fq (fastq)
	mod137_S_wohuman_clip.fastq (fastq)
	mod137_wohuman_screen100.2.fq (fastq)
SAMN03843654	mod138_wohuman_screen100.1.fq (fastq)
	mod138_S_wohuman_clip.fastq (fastq)
	mod138_wohuman_screen100.2.fq (fastq)
SAMN03843651	mod139_wohuman_screen100.1.fq (fastq)
	mod139_S_wohuman_clip.fastq (fastq)
	mod139_wohuman_screen100.2.fq (fastq)
SAMN03843652	mod140_wohuman_screen100.1.fq (fastq)
	mod140_S_wohuman_clip.fastq (fastq)
	mod140_wohuman_screen100.2.fq (fastq)
SAMN03843655	mod141_wohuman_screen100.1.fq (fastq)
	mod141_S_wohuman_clip.fastq (fastq)
	mod141_wohuman_screen100.2.fq (fastq)
SAMN03843658	mod142_wohuman_screen100.1.fq (fastq)
	mod142_S_wohuman_clip.fastq (fastq)
	mod142_wohuman_screen100.2.fq (fastq)
SAMN03843661	mod143_wohuman_screen100.1.fq (fastq)
	mod143_S_wohuman_clip.fastq (fastq)
	mod143_wohuman_screen100.2.fq (fastq)
SAMN03843665	mod144_wohuman_screen100.1.fq (fastq)
	mod144_S_wohuman_clip.fastq (fastq)
	mod144_wohuman_screen100.2.fq (fastq)
SAMN03843667	mod145_wohuman_screen100.1.fq (fastq)
	mod145_S_wohuman_clip.fastq (fastq)
	mod145_wohuman_screen100.2.fq (fastq)
SAMN03843670	mod146_wohuman_screen100.1.fq (fastq)
	mod146_S_wohuman_clip.fastq (fastq)
	mod146_wohuman_screen100.2.fq (fastq)
SAMN03843673	mod147_wohuman_screen100.1.fq (fastq)
	mod147_S_wohuman_clip.fastq (fastq)
	mod147_wohuman_screen100.2.fq (fastq)
SAMN03843676	mod148_wohuman_screen100.1.fq (fastq)
	mod148_S_wohuman_clip.fastq (fastq)
	mod148_wohuman_screen100.2.fq (fastq)
SAMN03843680	mod149_wohuman_screen100.1.fq (fastq)
	mod149_S_wohuman_clip.fastq (fastq)
	mod149_wohuman_screen100.2.fq (fastq)
SAMN03843683	mod150_wohuman_screen100.1.fq (fastq)
	mod150_S_wohuman_clip.fastq (fastq)
	mod150_wohuman_screen100.2.fq (fastq)
SAMN03844423	mod151_wohuman_screen100.1.fq (fastq)
	mod151_S_wohuman_clip.fastq (fastq)
	mod151_wohuman_screen100.2.fq (fastq)
SAMN03844426	mod152_wohuman_screen100.1.fq (fastq)
	mod152_S_wohuman_clip.fastq (fastq)
	mod152_wohuman_screen100.2.fq (fastq)
SAMN03844429	mod153_wohuman_screen100.1.fq (fastq)
	mod153_S_wohuman_clip.fastq (fastq)
	mod153_wohuman_screen100.2.fq (fastq)
SAMN03844431	mod154_wohuman_screen100.1.fq (fastq)
	mod154_S_wohuman_clip.fastq (fastq)
	mod154_wohuman_screen100.2.fq (fastq)
SAMN03844434	mod155_wohuman_screen100.1.fq (fastq)
	mod155_S_wohuman_clip.fastq (fastq)
	mod155_wohuman_screen100.2.fq (fastq)
SAMN03844436	mod156_wohuman_screen100.1.fq (fastq)
	mod156_S_wohuman_clip.fastq (fastq)
	mod156_wohuman_screen100.2.fq (fastq)
SAMN03844439	mod157_wohuman_screen100.1.fq (fastq)
	mod157_S_wohuman_clip.fastq (fastq)
	mod157_wohuman_screen100.2.fq (fastq)
SAMN03844442	mod158_wohuman_screen100.1.fq (fastq)
	mod158_S_wohuman_clip.fastq (fastq)
	mod158_wohuman_screen100.2.fq (fastq)
SAMN03844445	mod159_wohuman_screen100.1.fq (fastq)
	mod159_S_wohuman_clip.fastq (fastq)
	mod159_wohuman_screen100.2.fq (fastq)
SAMN03844448	mod160_wohuman_screen100.1.fq (fastq)
	mod160_S_wohuman_clip.fastq (fastq)
	mod160_wohuman_screen100.2.fq (fastq)
SAMN03844460	mod161_wohuman_screen100.1.fq (fastq)
	mod161_S_wohuman_clip.fastq (fastq)
	mod161_wohuman_screen100.2.fq (fastq)
SAMN03844463	mod162_wohuman_screen100.1.fq (fastq)
	mod162_S_wohuman_clip.fastq (fastq)
	mod162_wohuman_screen100.2.fq (fastq)
SAMN03844466	mod163_wohuman_screen100.1.fq (fastq)
	mod163_S_wohuman_clip.fastq (fastq)
	mod163_wohuman_screen100.2.fq (fastq)
SAMN03844470	mod164_wohuman_screen100.1.fq (fastq)
	mod164_S_wohuman_clip.fastq (fastq)
	mod164_wohuman_screen100.2.fq (fastq)
SAMN03844472	mod165_wohuman_screen100.1.fq (fastq)
	mod165_S_wohuman_clip.fastq (fastq)
	mod165_wohuman_screen100.2.fq (fastq)
SAMN03844475	mod166_wohuman_screen100.1.fq (fastq)
	mod166_S_wohuman_clip.fastq (fastq)
	mod166_wohuman_screen100.2.fq (fastq)
SAMN03844477	mod167_wohuman_screen100.1.fq (fastq)
	mod167_S_wohuman_clip.fastq (fastq)
	mod167_wohuman_screen100.2.fq (fastq)
SAMN03844480	mod168_wohuman_screen100.1.fq (fastq)
	mod168_S_wohuman_clip.fastq (fastq)
	mod168_wohuman_screen100.2.fq (fastq)
SAMN03844483	mod169_wohuman_screen100.1.fq (fastq)
	mod169_S_wohuman_clip.fastq (fastq)
	mod169_wohuman_screen100.2.fq (fastq)
SAMN03844486	mod170_wohuman_screen100.1.fq (fastq)
	mod170_S_wohuman_clip.fastq (fastq)
	mod170_wohuman_screen100.2.fq (fastq)
SAMN03845477	mod171_wohuman_screen100.1.fq (fastq)
	mod171_S_wohuman_clip.fastq (fastq)
	mod171_wohuman_screen100.2.fq (fastq)
SAMN03845480	mod172_wohuman_screen100.1.fq (fastq)
	mod172_S_wohuman_clip.fastq (fastq)
	mod172_wohuman_screen100.2.fq (fastq)
SAMN03845483	mod173_wohuman_screen100.1.fq (fastq)
	mod173_S_wohuman_clip.fastq (fastq)
	mod173_wohuman_screen100.2.fq (fastq)
SAMN03845485	mod174_wohuman_screen100.1.fq (fastq)
	mod174_S_wohuman_clip.fastq (fastq)
	mod174_wohuman_screen100.2.fq (fastq)
SAMN03845488	mod175_wohuman_screen100.1.fq (fastq)
	mod175_S_wohuman_clip.fastq (fastq)
	mod175_wohuman_screen100.2.fq (fastq)
SAMN03845490	mod176_wohuman_screen100.1.fq (fastq)
	mod176_S_wohuman_clip.fastq (fastq)
	mod176_wohuman_screen100.2.fq (fastq)
SAMN03845493	mod177_wohuman_screen100.1.fq (fastq)
	mod177_S_wohuman_clip.fastq (fastq)
	mod177_wohuman_screen100.2.fq (fastq)
SAMN03845496	mod178_wohuman_screen100.1.fq (fastq)
	mod178_S_wohuman_clip.fastq (fastq)
	mod178_wohuman_screen100.2.fq (fastq)
SAMN03845499	mod179_wohuman_screen100.1.fq (fastq)
	mod179_S_wohuman_clip.fastq (fastq)
	mod179_wohuman_screen100.2.fq (fastq)
SAMN03845502	mod180_wohuman_screen100.1.fq (fastq)
	mod180_S_wohuman_clip.fastq (fastq)
	mod180_wohuman_screen100.2.fq (fastq)
SAMN03845503	mod181_wohuman_screen100.1.fq (fastq)
	mod181_S_wohuman_clip.fastq (fastq)
	mod181_wohuman_screen100.2.fq (fastq)
SAMN03845448	mod182_wohuman_screen100.1.fq (fastq)
	mod182_S_wohuman_clip.fastq (fastq)
	mod182_wohuman_screen100.2.fq (fastq)
SAMN03845451	mod183_wohuman_screen100.1.fq (fastq)
	mod183_S_wohuman_clip.fastq (fastq)
	mod183_wohuman_screen100.2.fq (fastq)
SAMN03845454	mod184_wohuman_screen100.1.fq (fastq)
	mod184_S_wohuman_clip.fastq (fastq)
	mod184_wohuman_screen100.2.fq (fastq)
SAMN03845458	mod185_wohuman_screen100.1.fq (fastq)
	mod185_S_wohuman_clip.fastq (fastq)
	mod185_wohuman_screen100.2.fq (fastq)
SAMN03845460	mod186_wohuman_screen100.1.fq (fastq)
	mod186_S_wohuman_clip.fastq (fastq)
	mod186_wohuman_screen100.2.fq (fastq)
SAMN03845463	mod187_wohuman_screen100.1.fq (fastq)
	mod187_S_wohuman_clip.fastq (fastq)
	mod187_wohuman_screen100.2.fq (fastq)
SAMN03845466	mod188_wohuman_screen100.1.fq (fastq)
	mod188_S_wohuman_clip.fastq (fastq)
	mod188_wohuman_screen100.2.fq (fastq)
SAMN03845469	mod189_wohuman_screen100.1.fq (fastq)
	mod189_S_wohuman_clip.fastq (fastq)
	mod189_wohuman_screen100.2.fq (fastq)
SAMN03845472	mod190_wohuman_screen100.1.fq (fastq)
	mod190_S_wohuman_clip.fastq (fastq)
	mod190_wohuman_screen100.2.fq (fastq)
SAMN03845475	mod191_wohuman_screen100.1.fq (fastq)
	mod191_S_wohuman_clip.fastq (fastq)
	mod191_wohuman_screen100.2.fq (fastq)
SAMN03843155	mod192_wohuman_screen100.1.fq (fastq)
	mod192_S_wohuman_clip.fastq (fastq)
	mod192_wohuman_screen100.2.fq (fastq)
SAMN03843480	mod193_wohuman_screen100.1.fq (fastq)
	mod193_S_wohuman_clip.fastq (fastq)
	mod193_wohuman_screen100.2.fq (fastq)
SAMN03843490	mod194_wohuman_screen100.1.fq (fastq)
	mod194_S_wohuman_clip.fastq (fastq)
	mod194_wohuman_screen100.2.fq (fastq)
SAMN03843492	mod195_wohuman_screen100.1.fq (fastq)
	mod195_S_wohuman_clip.fastq (fastq)
	mod195_wohuman_screen100.2.fq (fastq)
SAMN03843495	mod196_wohuman_screen100.1.fq (fastq)
	mod196_S_wohuman_clip.fastq (fastq)
	mod196_wohuman_screen100.2.fq (fastq)
SAMN03843477	mod197_wohuman_screen100.1.fq (fastq)
	mod197_S_wohuman_clip.fastq (fastq)
	mod197_wohuman_screen100.2.fq (fastq)
SAMN03843471	mod198_wohuman_screen100.1.fq (fastq)
	mod198_S_wohuman_clip.fastq (fastq)
	mod198_wohuman_screen100.2.fq (fastq)
SAMN03843468	mod199_wohuman_screen100.1.fq (fastq)
	mod199_S_wohuman_clip.fastq (fastq)
	mod199_wohuman_screen100.2.fq (fastq)
SAMN03843464	mod200_wohuman_screen100.1.fq (fastq)
	mod200_S_wohuman_clip.fastq (fastq)
	mod200_wohuman_screen100.2.fq (fastq)
SAMN03843461	mod201_wohuman_screen100.1.fq (fastq)
	mod201_S_wohuman_clip.fastq (fastq)
	mod201_wohuman_screen100.2.fq (fastq)
SAMN03843463	mod202_wohuman_screen100.1.fq (fastq)
	mod202_S_wohuman_clip.fastq (fastq)
	mod202_wohuman_screen100.2.fq (fastq)
SAMN03843458	mod203_wohuman_screen100.1.fq (fastq)
	mod203_S_wohuman_clip.fastq (fastq)
	mod203_wohuman_screen100.2.fq (fastq)
SAMN03843497	mod204_wohuman_screen100.1.fq (fastq)
	mod204_S_wohuman_clip.fastq (fastq)
	mod204_wohuman_screen100.2.fq (fastq)
SAMN03843174	mod205_wohuman_screen100.1.fq (fastq)
	mod205_S_wohuman_clip.fastq (fastq)
	mod205_wohuman_screen100.2.fq (fastq)
SAMN03843149	mod206_wohuman_screen100.1.fq (fastq)
	mod206_S_wohuman_clip.fastq (fastq)
	mod206_wohuman_screen100.2.fq (fastq)
SAMN03843177	mod207_wohuman_screen100.1.fq (fastq)
	mod207_S_wohuman_clip.fastq (fastq)
	mod207_wohuman_screen100.2.fq (fastq)
SAMN03843180	mod208_wohuman_screen100.1.fq (fastq)
	mod208_S_wohuman_clip.fastq (fastq)
	mod208_wohuman_screen100.2.fq (fastq)
SAMN03843183	mod209_wohuman_screen100.1.fq (fastq)
	mod209_S_wohuman_clip.fastq (fastq)
	mod209_wohuman_screen100.2.fq (fastq)
SAMN03843300	mod211_wohuman_screen100.1.fq (fastq)
	mod211_S_wohuman_clip.fastq (fastq)
	mod211_wohuman_screen100.2.fq (fastq)
SAMN03843233	mod212_wohuman_screen100.1.fq (fastq)
	mod212_S_wohuman_clip.fastq (fastq)
	mod212_wohuman_screen100.2.fq (fastq)
SAMN03843224	mod213_wohuman_screen100.1.fq (fastq)
	mod213_S_wohuman_clip.fastq (fastq)
	mod213_wohuman_screen100.2.fq (fastq)
SAMN03843225	mod214_wohuman_screen100.1.fq (fastq)
	mod214_S_wohuman_clip.fastq (fastq)
	mod214_wohuman_screen100.2.fq (fastq)
SAMN03843228	mod215_wohuman_screen100.1.fq (fastq)
	mod215_S_wohuman_clip.fastq (fastq)
	mod215_wohuman_screen100.2.fq (fastq)
SAMN03843303	mod216_wohuman_screen100.1.fq (fastq)
	mod216_S_wohuman_clip.fastq (fastq)
	mod216_wohuman_screen100.2.fq (fastq)
SAMN03843232	mod217_wohuman_screen100.1.fq (fastq)
	mod217_S_wohuman_clip.fastq (fastq)
	mod217_wohuman_screen100.2.fq (fastq)
SAMN03843317	mod218_wohuman_screen100.1.fq (fastq)
	mod218_S_wohuman_clip.fastq (fastq)
	mod218_wohuman_screen100.2.fq (fastq)
SAMN03843319	mod219_wohuman_screen100.1.fq (fastq)
	mod219_S_wohuman_clip.fastq (fastq)
	mod219_wohuman_screen100.2.fq (fastq)
SAMN03843322	mod220_wohuman_screen100.1.fq (fastq)
	mod220_S_wohuman_clip.fastq (fastq)
	mod220_wohuman_screen100.2.fq (fastq)
SAMN03843323	mod221_wohuman_screen100.1.fq (fastq)
	mod221_S_wohuman_clip.fastq (fastq)
	mod221_wohuman_screen100.2.fq (fastq)
SAMN03843326	mod222_wohuman_screen100.1.fq (fastq)
	mod222_S_wohuman_clip.fastq (fastq)
	mod222_wohuman_screen100.2.fq (fastq)
SAMN03843329	mod223_wohuman_screen100.1.fq (fastq)
	mod223_S_wohuman_clip.fastq (fastq)
	mod223_wohuman_screen100.2.fq (fastq)
SAMN03843331	mod224_wohuman_screen100.1.fq (fastq)
	mod224_S_wohuman_clip.fastq (fastq)
	mod224_wohuman_screen100.2.fq (fastq)
SAMN03843345	mod225_wohuman_screen100.1.fq (fastq)
	mod225_S_wohuman_clip.fastq (fastq)
	mod225_wohuman_screen100.2.fq (fastq)
SAMN03843336	mod226_wohuman_screen100.1.fq (fastq)
	mod226_S_wohuman_clip.fastq (fastq)
	mod226_wohuman_screen100.2.fq (fastq)
SAMN03843339	mod227_wohuman_screen100.1.fq (fastq)
	mod227_S_wohuman_clip.fastq (fastq)
	mod227_wohuman_screen100.2.fq (fastq)
SAMN03843342	mod228_wohuman_screen100.1.fq (fastq)
	mod228_S_wohuman_clip.fastq (fastq)
	mod228_wohuman_screen100.2.fq (fastq)
SAMN03843344	mod229_wohuman_screen100.1.fq (fastq)
	mod229_S_wohuman_clip.fastq (fastq)
	mod229_wohuman_screen100.2.fq (fastq)
SAMN03844078	mod230_wohuman_screen100.1.fq (fastq)
	mod230_S_wohuman_clip.fastq (fastq)
	mod230_wohuman_screen100.2.fq (fastq)
SAMN03844079	mod231_wohuman_screen100.1.fq (fastq)
	mod231_S_wohuman_clip.fastq (fastq)
	mod231_wohuman_screen100.2.fq (fastq)
SAMN03844086	mod232_wohuman_screen100.1.fq (fastq)
	mod232_S_wohuman_clip.fastq (fastq)
	mod232_wohuman_screen100.2.fq (fastq)
SAMN03844082	mod233_wohuman_screen100.1.fq (fastq)
	mod233_S_wohuman_clip.fastq (fastq)
	mod233_wohuman_screen100.2.fq (fastq)
SAMN03844084	mod234_wohuman_screen100.1.fq (fastq)
	mod234_S_wohuman_clip.fastq (fastq)
	mod234_wohuman_screen100.2.fq (fastq)
SAMN03844090	mod235_wohuman_screen100.1.fq (fastq)
	mod235_S_wohuman_clip.fastq (fastq)
	mod235_wohuman_screen100.2.fq (fastq)
SAMN03844093	mod236_wohuman_screen100.1.fq (fastq)
	mod236_S_wohuman_clip.fastq (fastq)
	mod236_wohuman_screen100.2.fq (fastq)
SAMN03844096	mod237_wohuman_screen100.1.fq (fastq)
	mod237_S_wohuman_clip.fastq (fastq)
	mod237_wohuman_screen100.2.fq (fastq)
SAMN03844099	mod238_wohuman_screen100.1.fq (fastq)
	mod238_S_wohuman_clip.fastq (fastq)
	mod238_wohuman_screen100.2.fq (fastq)
SAMN03844102	mod239_wohuman_screen100.1.fq (fastq)
	mod239_S_wohuman_clip.fastq (fastq)
	mod239_wohuman_screen100.2.fq (fastq)
SAMN03844104	mod240_wohuman_screen100.1.fq (fastq)
	mod240_S_wohuman_clip.fastq (fastq)
	mod240_wohuman_screen100.2.fq (fastq)
SAMN03844107	mod241_wohuman_screen100.1.fq (fastq)
	mod241_S_wohuman_clip.fastq (fastq)
	mod241_wohuman_screen100.2.fq (fastq)
SAMN03844110	mod242_wohuman_screen100.1.fq (fastq)
	mod242_S_wohuman_clip.fastq (fastq)
	mod242_wohuman_screen100.2.fq (fastq)
SAMN03844055	mod243_wohuman_screen100.1.fq (fastq)
	mod243_S_wohuman_clip.fastq (fastq)
	mod243_wohuman_screen100.2.fq (fastq)
SAMN03844056	mod244_wohuman_screen100.1.fq (fastq)
	mod244_S_wohuman_clip.fastq (fastq)
	mod244_wohuman_screen100.2.fq (fastq)
SAMN03844059	mod245_wohuman_screen100.1.fq (fastq)
	mod245_S_wohuman_clip.fastq (fastq)
	mod245_wohuman_screen100.2.fq (fastq)
SAMN03844144	mod246_wohuman_screen100.1.fq (fastq)
	mod246_S_wohuman_clip.fastq (fastq)
	mod246_wohuman_screen100.2.fq (fastq)
SAMN03844147	mod247_wohuman_screen100.1.fq (fastq)
	mod247_S_wohuman_clip.fastq (fastq)
	mod247_wohuman_screen100.2.fq (fastq)
SAMN03844150	mod248_wohuman_screen100.1.fq (fastq)
	mod248_S_wohuman_clip.fastq (fastq)
	mod248_wohuman_screen100.2.fq (fastq)
SAMN03844152	mod249_wohuman_screen100.1.fq (fastq)
	mod249_S_wohuman_clip.fastq (fastq)
	mod249_wohuman_screen100.2.fq (fastq)
SAMN03844154	mod250_wohuman_screen100.1.fq (fastq)
	mod250_S_wohuman_clip.fastq (fastq)
	mod250_wohuman_screen100.2.fq (fastq)
SAMN03844156	mod251_wohuman_screen100.1.fq (fastq)
	mod251_S_wohuman_clip.fastq (fastq)
	mod251_wohuman_screen100.2.fq (fastq)
SAMN03845223	mod252_wohuman_screen100.1.fq (fastq)
	mod252_S_wohuman_clip.fastq (fastq)
	mod252_wohuman_screen100.2.fq (fastq)
SAMN03845036	mod253_wohuman_screen100.1.fq (fastq)
	mod253_S_wohuman_clip.fastq (fastq)
	mod253_wohuman_screen100.2.fq (fastq)
SAMN03845038	mod254_wohuman_screen100.1.fq (fastq)
	mod254_S_wohuman_clip.fastq (fastq)
	mod254_wohuman_screen100.2.fq (fastq)
SAMN03845029	mod255_wohuman_screen100.1.fq (fastq)
	mod255_S_wohuman_clip.fastq (fastq)
	mod255_wohuman_screen100.2.fq (fastq)
SAMN03845043	mod256_wohuman_screen100.1.fq (fastq)
	mod256_S_wohuman_clip.fastq (fastq)
	mod256_wohuman_screen100.2.fq (fastq)
SAMN03845046	mod257_wohuman_screen100.1.fq (fastq)
	mod257_S_wohuman_clip.fastq (fastq)
	mod257_wohuman_screen100.2.fq (fastq)
SAMN03845048	mod258_wohuman_screen100.1.fq (fastq)
	mod258_S_wohuman_clip.fastq (fastq)
	mod258_wohuman_screen100.2.fq (fastq)
SAMN03845030	mod259_wohuman_screen100.1.fq (fastq)
	mod259_S_wohuman_clip.fastq (fastq)
	mod259_wohuman_screen100.2.fq (fastq)
SAMN03845053	mod260_wohuman_screen100.1.fq (fastq)
	mod260_S_wohuman_clip.fastq (fastq)
	mod260_wohuman_screen100.2.fq (fastq)
SAMN03845056	mod261_wohuman_screen100.1.fq (fastq)
	mod261_S_wohuman_clip.fastq (fastq)
	mod261_wohuman_screen100.2.fq (fastq)
SAMN03845058	mod262_wohuman_screen100.1.fq (fastq)
	mod262_S_wohuman_clip.fastq (fastq)
	mod262_wohuman_screen100.2.fq (fastq)
SAMN03845033	mod263_wohuman_screen100.1.fq (fastq)
	mod263_S_wohuman_clip.fastq (fastq)
	mod263_wohuman_screen100.2.fq (fastq)
SAMN03845217	mod264_wohuman_screen100.1.fq (fastq)
	mod264_S_wohuman_clip.fastq (fastq)
	mod264_wohuman_screen100.2.fq (fastq)
SAMN03844005	mod265_wohuman_screen100.1.fq (fastq)
	mod265_S_wohuman_clip.fastq (fastq)
	mod265_wohuman_screen100.2.fq (fastq)
SAMN03843968	mod266_wohuman_screen100.1.fq (fastq)
	mod266_S_wohuman_clip.fastq (fastq)
	mod266_wohuman_screen100.2.fq (fastq)
SAMN03844177	mod267_wohuman_screen100.1.fq (fastq)
	mod267_S_wohuman_clip.fastq (fastq)
	mod267_wohuman_screen100.2.fq (fastq)
SAMN03844180	mod268_wohuman_screen100.1.fq (fastq)
	mod268_S_wohuman_clip.fastq (fastq)
	mod268_wohuman_screen100.2.fq (fastq)
SAMN03844183	mod269_wohuman_screen100.1.fq (fastq)
	mod269_S_wohuman_clip.fastq (fastq)
	mod269_wohuman_screen100.2.fq (fastq)
SAMN03845019	mod270_wohuman_screen100.1.fq (fastq)
	mod270_S_wohuman_clip.fastq (fastq)
	mod270_wohuman_screen100.2.fq (fastq)
SAMN03845027	mod271_wohuman_screen100.1.fq (fastq)
	mod271_S_wohuman_clip.fastq (fastq)
	mod271_wohuman_screen100.2.fq (fastq)
SAMN03845079	mod272_wohuman_screen100.1.fq (fastq)
	mod272_S_wohuman_clip.fastq (fastq)
	mod272_wohuman_screen100.2.fq (fastq)
SAMN03845082	mod273_wohuman_screen100.1.fq (fastq)
	mod273_S_wohuman_clip.fastq (fastq)
	mod273_wohuman_screen100.2.fq (fastq)
SAMN03845085	mod274_wohuman_screen100.1.fq (fastq)
	mod274_S_wohuman_clip.fastq (fastq)
	mod274_wohuman_screen100.2.fq (fastq)
SAMN03844957	mod275_wohuman_screen100.1.fq (fastq)
	mod275_S_wohuman_clip.fastq (fastq)
	mod275_wohuman_screen100.2.fq (fastq)
SAMN03845005	mod276_wohuman_screen100.1.fq (fastq)
	mod276_S_wohuman_clip.fastq (fastq)
	mod276_wohuman_screen100.2.fq (fastq)
SAMN03845061	mod277_wohuman_screen100.1.fq (fastq)
	mod277_S_wohuman_clip.fastq (fastq)
	mod277_wohuman_screen100.2.fq (fastq)
SAMN03845063	mod278_wohuman_screen100.1.fq (fastq)
	mod278_S_wohuman_clip.fastq (fastq)
	mod278_wohuman_screen100.2.fq (fastq)
SAMN03845066	mod279_wohuman_screen100.1.fq (fastq)
	mod279_S_wohuman_clip.fastq (fastq)
	mod279_wohuman_screen100.2.fq (fastq)
SAMN03845069	mod280_wohuman_screen100.1.fq (fastq)
	mod280_S_wohuman_clip.fastq (fastq)
	mod280_wohuman_screen100.2.fq (fastq)
SAMN03845071	mod281_wohuman_screen100.1.fq (fastq)
	mod281_S_wohuman_clip.fastq (fastq)
	mod281_wohuman_screen100.2.fq (fastq)
SAMN03845074	mod282_wohuman_screen100.1.fq (fastq)
	mod282_S_wohuman_clip.fastq (fastq)
	mod282_wohuman_screen100.2.fq (fastq)
SAMN03845076	mod283_wohuman_screen100.1.fq (fastq)
	mod283_S_wohuman_clip.fastq (fastq)
	mod283_wohuman_screen100.2.fq (fastq)
SAMN03845158	mod284_wohuman_screen100.1.fq (fastq)
	mod284_S_wohuman_clip.fastq (fastq)
	mod284_wohuman_screen100.2.fq (fastq)
SAMN03845159	mod285_wohuman_screen100.1.fq (fastq)
	mod285_S_wohuman_clip.fastq (fastq)
	mod285_wohuman_screen100.2.fq (fastq)
SAMN03845162	mod286_wohuman_screen100.1.fq (fastq)
	mod286_S_wohuman_clip.fastq (fastq)
	mod286_wohuman_screen100.2.fq (fastq)
SAMN03845165	mod287_wohuman_screen100.1.fq (fastq)
	mod287_S_wohuman_clip.fastq (fastq)
	mod287_wohuman_screen100.2.fq (fastq)
SAMN03845168	mod288_wohuman_screen100.1.fq (fastq)
	mod288_S_wohuman_clip.fastq (fastq)
	mod288_wohuman_screen100.2.fq (fastq)
SAMN03845171	mod289_wohuman_screen100.1.fq (fastq)
	mod289_S_wohuman_clip.fastq (fastq)
	mod289_wohuman_screen100.2.fq (fastq)
SAMN03845174	mod290_wohuman_screen100.1.fq (fastq)
	mod290_S_wohuman_clip.fastq (fastq)
	mod290_wohuman_screen100.2.fq (fastq)
SAMN03845176	mod291_wohuman_screen100.1.fq (fastq)
	mod291_S_wohuman_clip.fastq (fastq)
	mod291_wohuman_screen100.2.fq (fastq)
SAMN03845179	mod292_wohuman_screen100.1.fq (fastq)
	mod292_S_wohuman_clip.fastq (fastq)
	mod292_wohuman_screen100.2.fq (fastq)
SAMN03845181	mod293_wohuman_screen100.1.fq (fastq)
	mod293_S_wohuman_clip.fastq (fastq)
	mod293_wohuman_screen100.2.fq (fastq)
